# Supplementary material for: Electronic structure contributions to O–O bond cleavage reactions for MnIII-alkylperoxo complexes
Source: Royal Society of Chemistry journal article supplement (doi:10.1039/d3dt01672b), 2023-01-01
Supplement: d3dt01672b1.pdf [file d3dt01672b1.pdf]

**Supplementary Information for**  
**Electronic Structure Contributions to O—O Bond Cleavage**  
**Reactions for Mn<sup>III</sup>-alkylperoxo complexes**

Samuel A. Brunclik, Adedamola A. Opalade, and Timothy A. Jackson\*

*The University of Kansas, Department of Chemistry and Center for Environmentally Beneficial Catalysis,  
1567 Irving Hill Road, Lawrence, KS 66045, USA.*

\*To whom correspondence should be addressed:

Timothy A. Jackson  
Phone: (785) 864-3968  
taj@ku.edu

**Table S1.** Metric Parameters for  $[\text{Mn}^{\text{III}}(\text{OO}^t\text{Bu})(\text{N}_4\text{S})]^+$  and  $[\text{Mn}^{\text{III}}(\text{OOCm})(^6\text{Me}\text{dpaq})]^+$  from X-ray Crystallography and DFT Geometry Optimizations using a Variety of Density Functionals.

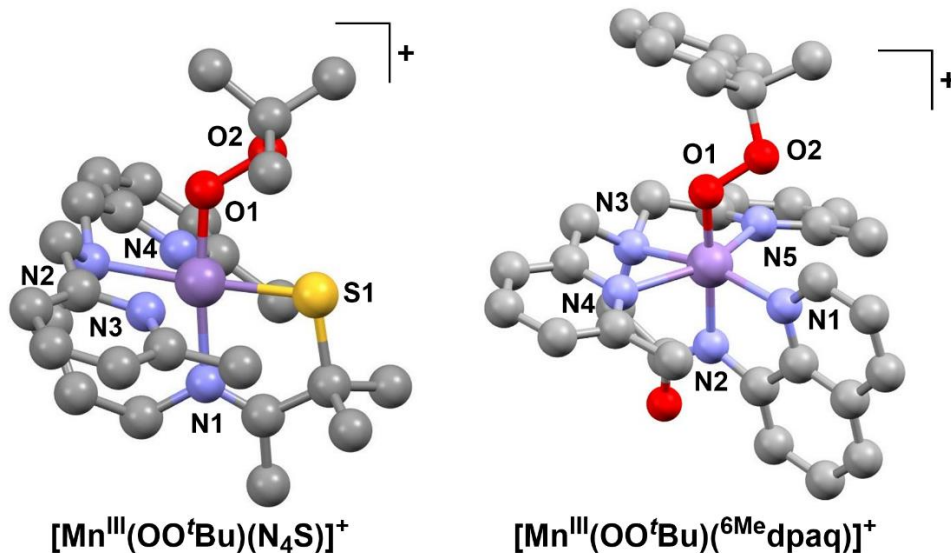

| Bond                                                                   | $[\text{Mn}^{\text{III}}(\text{OOCm})(^6\text{Me}\text{dpaq})]^+$ |        |         |          |        |          |        |
|------------------------------------------------------------------------|-------------------------------------------------------------------|--------|---------|----------|--------|----------|--------|
|                                                                        | XRD                                                               | TPSS   | TPSS-D3 | TPSSh-D3 | B3LYP  | B3LYP-D3 | M06-L  |
| Mn–O1                                                                  | 1.849(3)                                                          | 1.840  | 1.838   | 1.836    | 1.840  | 1.840    | 1.858  |
| Mn–N1                                                                  | 2.044(4)                                                          | 2.044  | 2.040   | 2.047    | 2.063  | 2.058    | 2.068  |
| Mn–N2                                                                  | 1.955(4)                                                          | 1.958  | 1.958   | 1.955    | 1.963  | 1.959    | 1.980  |
| Mn–N3                                                                  | 2.100(4)                                                          | 2.150  | 2.155   | 2.146    | 2.169  | 2.169    | 2.187  |
| Mn–N4                                                                  | 2.284(4)                                                          | 2.409  | 2.345   | 2.403    | 2.434  | 2.362    | 2.335  |
| Mn–N5                                                                  | 2.394(4)                                                          | 2.415  | 2.351   | 2.404    | 2.440  | 2.363    | 2.346  |
| Mn–N(py) <sub>avg</sub>                                                | 2.339                                                             | 2.412  | 2.348   | 2.404    | 2.437  | 2.362    | 2.340  |
| O1–O2                                                                  | 1.466(4)                                                          | 1.471  | 1.469   | 1.454    | 1.447  | 1.444    | 1.448  |
| Mn–O1–O2                                                               | 110.4(2)                                                          | 115.4  | 111.8   | 114.5    | 115.4  | 111.6    | 107.0  |
| $[\text{Mn}^{\text{III}}(\text{OO}^t\text{Bu})(\text{N}_4\text{S})]^+$ |                                                                   |        |         |          |        |          |        |
| Mn–O1                                                                  | 1.843(3)                                                          | 1.843  | 1.840   | 1.838    | 1.849  | 1.845    | 1.860  |
| Mn–S1                                                                  | 2.260(1)                                                          | 2.252  | 2.247   | 2.253    | 2.268  | 2.266    | 2.273  |
| Mn–N1                                                                  | 2.061(4)                                                          | 2.108  | 2.089   | 2.091    | 2.131  | 2.109    | 2.115  |
| Mn–N2                                                                  | 2.178(4)                                                          | 2.238  | 2.229   | 2.224    | 2.271  | 2.255    | 2.253  |
| Mn–N3                                                                  | 2.516(3)                                                          | 2.585  | 2.504   | 2.501    | 2.648  | 2.532    | 2.514  |
| Mn–N4                                                                  | 2.504(4)                                                          | 2.476  | 2.419   | 2.430    | 2.535  | 2.464    | 2.450  |
| Mn–N(py) <sub>avg</sub>                                                | 2.510                                                             | 2.531  | 2.460   | 2.466    | 2.591  | 2.498    | 2.482  |
| O1–O2                                                                  | 1.431(5)                                                          | 1.463  | 1.465   | 1.448    | 1.439  | 1.440    | 1.437  |
| Mn–O1–O2                                                               | 124.3(3)                                                          | 114.07 | 110.84  | 110.04   | 113.94 | 110.68   | 108.57 |

**Table S2.** Relative Single-Point Energies of Different Spin States of  $[\text{Mn}^{\text{III}}(\text{OO}'\text{Bu})(\text{N}_4\text{S})]^+$  and  $[\text{Mn}^{\text{III}}(\text{OO}'\text{Bu})(^6\text{Me}^{\text{d}}\text{paq})]^+$  Optimized using Different Density Functionals.

|                               | $[\text{Mn}^{\text{III}}(\text{OO}'\text{Bu})(^6\text{Me}^{\text{d}}\text{paq})]^+$ |         |         | $[\text{Mn}^{\text{III}}(\text{OO}'\text{Bu})(\text{N}_4\text{S})]^+$ |         |         |
|-------------------------------|-------------------------------------------------------------------------------------|---------|---------|-----------------------------------------------------------------------|---------|---------|
|                               | quintet                                                                             | triplet | singlet | quintet                                                               | triplet | singlet |
| <b>Optimization: TPSSh-D3</b> |                                                                                     |         |         |                                                                       |         |         |
| Energy: TPSSh-D3              | 0.0                                                                                 | 8.0     | 16.1    | 0.0                                                                   | 13.9    | 20.9    |
| B3LYP-D3                      | 0.0                                                                                 | 17.4    | 28.1    | 0.0                                                                   | 20.9    | 31.1    |
| <b>Optimization: TPSS-D3</b>  |                                                                                     |         |         |                                                                       |         |         |
| Energy: TPSSh-D3              | 0.0                                                                                 | 8.3     | 16.6    | 0.0                                                                   | 14.2    | 21.2    |
| B3LYP-D3                      | 0.0                                                                                 | 17.7    | 28.4    | 0.0                                                                   | 21.5    | 31.5    |
| <b>Optimization: B3LYP-D3</b> |                                                                                     |         |         |                                                                       |         |         |
| Energy: TPSSh-D3              | 0.0                                                                                 | 8.4     | 17.1    | 0.0                                                                   | 13.7    | 20.8    |
| B3LYP-D3                      | 0.0                                                                                 | 17.3    | 27.8    | 0.0                                                                   | 20.9    | 31.2    |

**Table S3.** Relative Single-Point Energies using Different Functionals for  $[\text{Mn}^{\text{III}}(\text{OO}'\text{Bu})(\text{N}_4\text{S})]^+$  and  $[\text{Mn}^{\text{III}}(\text{OO}'\text{Bu})(^6\text{Me}^{\text{d}}\text{paq})]^+$  in Various Spin States.<sup>a</sup>

| Functional        | $[\text{Mn}^{\text{III}}(\text{OO}'\text{Bu})(\text{N}_4\text{S})]^+$ |         |              | $[\text{Mn}^{\text{III}}(\text{OO}'\text{Bu})(^6\text{Me}^{\text{d}}\text{paq})]^+$ |         |         |
|-------------------|-----------------------------------------------------------------------|---------|--------------|-------------------------------------------------------------------------------------|---------|---------|
|                   | quintet                                                               | triplet | singlet      | quintet                                                                             | triplet | singlet |
| TPSS-D3           | 0.0                                                                   | 6.7     | 13.7         | 0.0                                                                                 | 2.1     | 8.4     |
| PBE               | 0.0                                                                   | 10.6    | 19.2         | 0.0                                                                                 | 2.8     | 16.8    |
| TPSSh-D3 (10%)    | 0.0                                                                   | 14.0    | 20.9         | 0.0                                                                                 | 8.2     | 16.3    |
| TPSS0 (25%)       | 0.0                                                                   | 24.6    | 31.6         | 0.0                                                                                 | 14.0    | 23.8    |
| B3LYP-D3          | 0.0                                                                   | 20.9    | 31.1         | 0.0                                                                                 | 17.5    | 28.1    |
| B3LYP (25%)       | 0.0                                                                   | 27.5    | 37.2         | 0.0                                                                                 | 14.9    | 25.3    |
| PBE0-D3           | 0.0                                                                   | 25.6    | 35.8         | 0.0                                                                                 | 18.1    | 29.8    |
| PBE0              | 0.0                                                                   | 27.4    | 37.6         | 0.0                                                                                 | 16.9    | 28.4    |
| M06L              | 0.0                                                                   | 25.2    | 38.9         | 0.0                                                                                 | 16.9    | 30.0    |
| M06 (27%)         | 0.0                                                                   | 37.7    | <sup>b</sup> | 0.0                                                                                 | 27.8    | 43.6    |
| M062X             | 0.0                                                                   | 39.5    | 53.9         | 0.0                                                                                 | 29.0    | 43.8    |
| wB97X             | 0.0                                                                   | 25.1    | 36.1         | 0.0                                                                                 | 15.1    | 43.6    |
| <i>def2-QZVPP</i> |                                                                       |         |              |                                                                                     |         |         |
| TPSSh-D3          | 0.0                                                                   | 14.3    | 21.1         | 0.0                                                                                 | 8.6     | 16.8    |
| B3LYP-D3          | 0.0                                                                   | 21.1    | 31.2         | 0.0                                                                                 | 17.7    | 28.3    |

<sup>a</sup> Structures used for all calculations were determined using the TPSSh-D3 functional. <sup>b</sup> We were unable to converge the SCF cycle for this calculation.

**Table S4.** Comparison of TPSSh and B3LYP DFT-computed Energies for Reactants, Transition States (TS), and Product Complexes (PC) involved in the Homolytic and Heterolytic Cleavage of the O–O Bond of  $[\text{Mn}^{\text{III}}(\text{OO}'\text{Bu})(\text{N4S})]^+$  and  $[\text{Mn}^{\text{III}}(\text{OO}'\text{Bu})(^6\text{Me}^{\text{d}}\text{paq})]^+$ .

|                                                                                                       | <sup>5</sup> reactant | <sup>3</sup> reactant | <sup>1</sup> reactant | <sup>5</sup> TS | <sup>3</sup> TS | <sup>1</sup> TS | <sup>5</sup> PC | <sup>3</sup> PC | <sup>1</sup> PC |
|-------------------------------------------------------------------------------------------------------|-----------------------|-----------------------|-----------------------|-----------------|-----------------|-----------------|-----------------|-----------------|-----------------|
| <b><math>[\text{Mn}^{\text{III}}(\text{OO}'\text{Bu})(\text{N4S})]^+</math></b>                       |                       |                       |                       |                 |                 |                 |                 |                 |                 |
| <i>TPSSh</i> <sup>a</sup>                                                                             |                       |                       |                       |                 |                 |                 |                 |                 |                 |
| <i>E</i>                                                                                              | 0                     | 13.9                  | 20.9                  | 24.9            | 21.8            | 32.8            | 19.1            | 19.0            | 30.6            |
| $\Delta H$                                                                                            | 0                     | 15.1                  | 19.7                  | 23.2            | 21.6            | 32.3            | 18.7            | 17.0            | 28.4            |
| T $\Delta S$                                                                                          | 0                     | -1.3                  | -1.3                  | 0.1             | -1.8            | -1.4            | 0.3             | -0.1            | 0.4             |
| $\Delta G$                                                                                            | 0                     | 16.3                  | 21.0                  | 23.1            | 23.3            | 33.6            | 18.4            | 17.1            | 28.0            |
| <i>B3LYP</i> <sup>b</sup>                                                                             |                       |                       |                       |                 |                 |                 |                 |                 |                 |
| <i>E</i>                                                                                              | 0                     | 20.9                  | 31.1                  | 27.5            | 32.1            | 45.7            | 26.7            | 27.2            | 41.2            |
| $\Delta H$                                                                                            | 0                     | 22.1                  | 29.9                  | 25.8            | 31.9            | 45.2            | 26.3            | 25.3            | 38.9            |
| T $\Delta S$                                                                                          | 0                     | -1.3                  | -1.3                  | 0.1             | -1.8            | -1.4            | 0.3             | -0.1            | 0.4             |
| $\Delta G$                                                                                            | 0                     | 23.3                  | 31.2                  | 25.7            | 33.7            | 46.6            | 25.9            | 25.4            | 38.5            |
| <b><math>[\text{Mn}^{\text{III}}(\text{OO}'\text{Bu})(^6\text{Me}^{\text{d}}\text{paq})]^+</math></b> |                       |                       |                       |                 |                 |                 |                 |                 |                 |
| <i>TPSSh</i> <sup>a</sup>                                                                             |                       |                       |                       |                 |                 |                 |                 |                 |                 |
| <i>E</i>                                                                                              | 0                     | 8.0                   | 16.1                  | 25.1            | 27.8            | 27.2            | 20.9            | 20.6            | 24.1            |
| $\Delta H$                                                                                            | 0                     | 8.6                   | 16.6                  | 23.4            | 26.7            | 26.3            | 20.6            | 20.8            | 24.8            |
| T $\Delta S$                                                                                          | 0                     | -2.1                  | -1.9                  | 0.4             | -1.7            | -2.0            | 0.4             | 0.3             | 0.1             |
| $\Delta G$                                                                                            | 0                     | 10.7                  | 18.5                  | 23.0            | 28.4            | 28.3            | 20.2            | 20.5            | 24.7            |
| <i>B3LYP</i> <sup>b</sup>                                                                             |                       |                       |                       |                 |                 |                 |                 |                 |                 |
| <i>E</i>                                                                                              | 0                     | 15.0                  | 25.6                  | 25.4            | 38.5            | 48.3            | 24.9            | 31.9            | 31.9            |
| $\Delta H$                                                                                            | 0                     | 15.6                  | 26.2                  | 23.6            | 37.6            | 47.6            | 24.5            | 32.4            | 32.5            |
| T $\Delta S$                                                                                          | 0                     | -2.1                  | -1.9                  | 0.4             | -2.2            | -2.4            | 0.4             | -0.1            | 0.1             |
| $\Delta G$                                                                                            | 0                     | 17.7                  | 28.1                  | 23.2            | 39.7            | 50.1            | 24.1            | 32.5            | 32.4            |

<sup>a</sup> Calculations used the TPSSh functional for geometry optimizations and single point energies. <sup>b</sup> Calculations used the TPSSh functional for geometry optimizations and the B3LYP functional for single point energies.

**Table S5.** Selected Structural Parameters, DFT-computed Energies, and Mulliken Spin Densities for Quintet and Triplet Reactants and Quintet-Triplet Minimum Energy Crossing Point (MECP) of  $[\text{Mn}^{\text{III}}(\text{OO}^t\text{Bu})(\text{N4S})]^+$ .

|                                                 | $^5\text{reactant}$ | $^3\text{reactant}$ | MECP    |         |
|-------------------------------------------------|---------------------|---------------------|---------|---------|
| <b><i>structural parameters<sup>a</sup></i></b> |                     |                     |         |         |
| Mn–O1                                           | 1.84                | 1.82                | 1.83    |         |
| O1–O2                                           | 1.45                | 1.46                | 1.46    |         |
| Mn–S1                                           | 2.25                | 2.22                | 2.21    |         |
| Mn–N1                                           | 2.09                | 2.12                | 2.1     |         |
| Mn–N2                                           | 2.22                | 2.16                | 2.12    |         |
| Mn–N3                                           | 2.5                 | 2.22                | 2.14    |         |
| Mn–N4                                           | 2.43                | 2.19                | 2.13    |         |
| Mn–O1–O2                                        | 110.0               | 114.2               | 114     |         |
| N1–Mn–O1                                        | 174.8               | 173.3               | 172     |         |
| <b><i>energies<sup>b</sup></i></b>              |                     |                     |         |         |
| <i>E</i>                                        | 0                   | 13.9                | 17.6    |         |
| $\Delta H$                                      | 0                   | 15.1                | 16.1    |         |
| $T\Delta S$                                     | 0                   | -1.3                | -0.7    |         |
| $\Delta G$                                      | 0                   | 16.3                | 16.8    |         |
| <b><i>spin densities</i></b>                    |                     |                     |         |         |
|                                                 |                     |                     | quintet | triplet |
| Mn                                              | 3.97                | 1.09                | 3.79    | 1.87    |
| O1                                              | 0.01                | 0.12                | 0.03    | 0.12    |
| O2                                              | 0.02                | 0.01                | 0.04    | 0.02    |
| S1                                              | -0.01               | 0.09                | 0.04    | 0.07    |

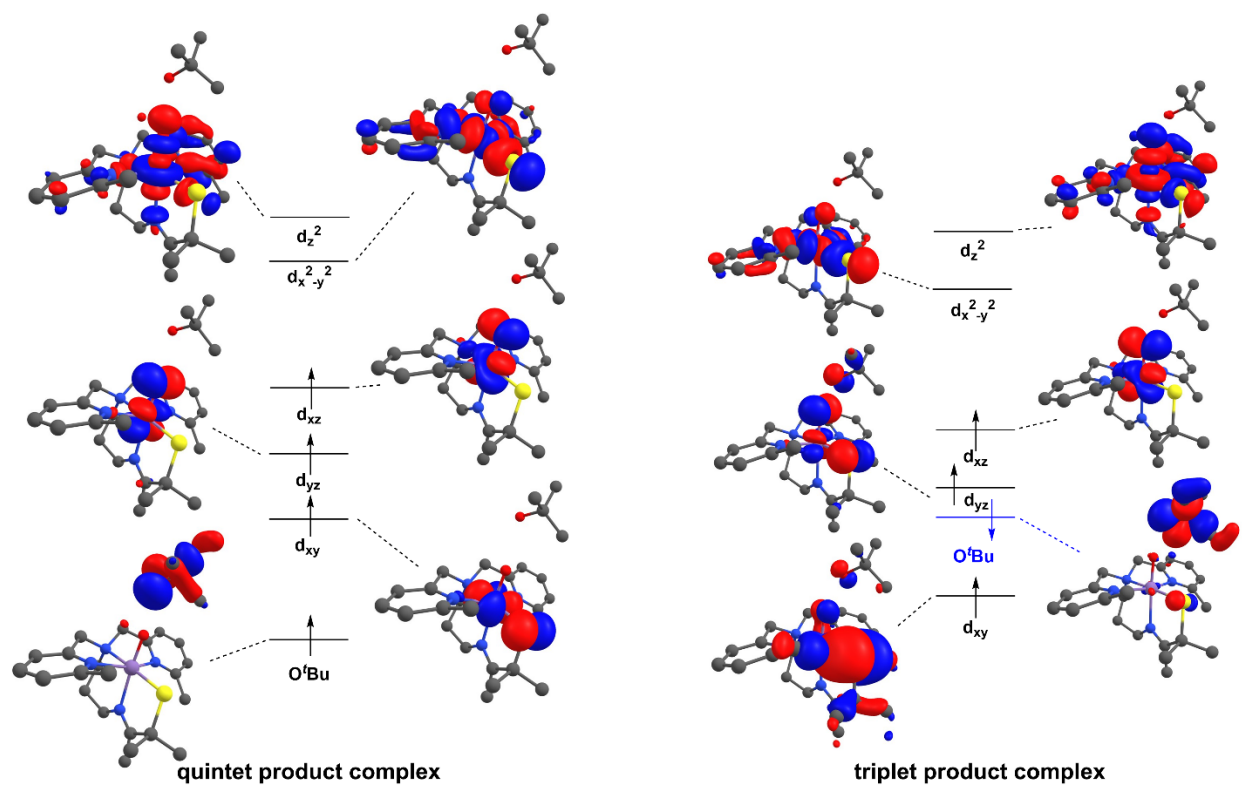

**Figure S1.** Surface contour plots (quasi-restricted MOs) and qualitative frontier MO splitting diagrams for the quintet (left) and triplet (right) product complexes of O–O bond homolysis of  $[\text{Mn}^{\text{III}}(\text{OO}'\text{Bu})(\text{N4S})]^+$ .

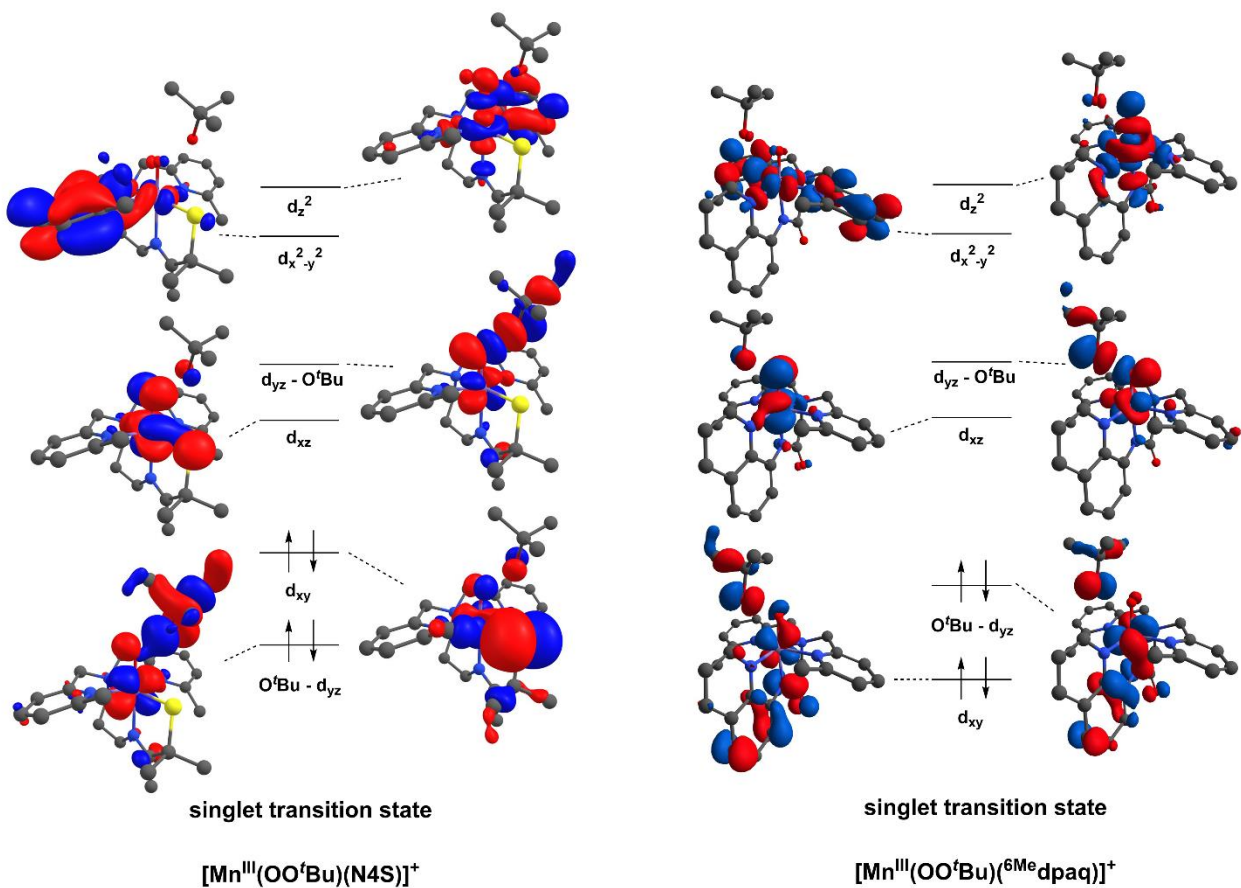

**Figure S2.** Surface contour plots (quasi-restricted MOs) and qualitative frontier MO splitting diagrams for the singlet transition states of  $[\text{Mn}^{\text{III}}(\text{OO}'\text{Bu})(\text{N4S})]^+$  (left) and  $[\text{Mn}^{\text{III}}(\text{OO}'\text{Bu})(^6\text{Me dpaq})]^+$  (right).

**[Mn<sup>III</sup>(OO<sup>t</sup>Bu)(<sup>6</sup>Me dpaq)]<sup>+</sup> - quintet reactant (TPSSh)**

|    |                   |                   |                   |
|----|-------------------|-------------------|-------------------|
| Mn | 5.00991100984683  | 1.09032551870600  | 2.94741555693639  |
| O  | 5.11387500492476  | 1.57127322545113  | 4.71479784592105  |
| O  | 5.34721161656063  | 3.00886668008999  | 4.77885516765633  |
| O  | 5.54661231019340  | -1.06252935221355 | -0.46611360343429 |
| N  | 3.28130440110176  | 2.07410545656571  | 2.48995035556188  |
| N  | 4.75093363015761  | 0.43067680629312  | 1.12573730934715  |
| N  | 6.69501072641384  | -0.25801314506156 | 2.88084864271184  |
| N  | 4.03807612894754  | -0.99658920015940 | 3.61233148067851  |
| N  | 6.81681364590229  | 2.37984305408677  | 2.41469053399371  |
| C  | 2.62196045997100  | 2.92638503031385  | 3.26494891098443  |
| C  | 1.38902728597141  | 3.47974946076245  | 2.86992331526009  |
| C  | 0.84486761951525  | 3.12422400165960  | 1.64755143474912  |
| C  | 1.52963842133758  | 2.21546224910854  | 0.79986706840323  |
| C  | 1.05960936905940  | 1.77802933763264  | -0.46719216520087 |
| C  | 1.81979017008654  | 0.88449256743715  | -1.19925792820789 |
| C  | 3.06107064126903  | 0.38460565391835  | -0.73364127845288 |
| C  | 3.55497297120064  | 0.79194358378023  | 0.50475441727427  |
| C  | 2.77582933218986  | 1.70932974727696  | 1.27001374597646  |
| C  | 5.64476898871441  | -0.45864269976253 | 0.59322544882433  |
| C  | 6.90804957782780  | -0.59265107036493 | 1.44226587379316  |
| C  | 6.38632503791810  | -1.46771537436652 | 3.67873726705448  |
| C  | 4.97999431722747  | -1.94232090066594 | 3.42985280260200  |
| C  | 4.67379198778679  | -3.26122739218412 | 3.11350898753038  |
| C  | 3.32504500641747  | -3.61823637351238 | 3.00706247247691  |
| C  | 2.35437989698286  | -2.65499855762520 | 3.25948074057525  |
| C  | 2.73899112816282  | -1.33893855554027 | 3.56958071064120  |
| C  | 7.84967718766304  | 0.46290672503808  | 3.45713317258728  |
| C  | 7.96342784428252  | 1.83860381690497  | 2.85343767399643  |
| C  | 9.18136775062390  | 2.51487485540901  | 2.79274792749908  |
| C  | 9.19432556659998  | 3.80668255597144  | 2.26539822844826  |
| C  | 8.00041849050982  | 4.36000934655923  | 1.80442379446912  |
| C  | 6.81433717094009  | 3.61936365890468  | 1.88607260841621  |
| C  | 1.71243046096509  | -0.29199172048885 | 3.89501081748889  |
| C  | 5.50587617948525  | 4.17142100243612  | 1.40742536329837  |
| C  | 5.76206391540533  | 3.36838791800464  | 6.12817596962551  |
| C  | 7.05899057234423  | 2.64385854800198  | 6.48793677133655  |
| C  | 5.98748002984978  | 4.87408738752899  | 5.98005894062776  |
| C  | 4.63837895070567  | 3.05163166095122  | 7.11434606509472  |
| H  | 3.09665123835458  | 3.17042512986900  | 4.21590112277643  |
| H  | 0.87885327190866  | 4.17727784318887  | 3.53503135403380  |
| H  | -0.11357587747556 | 3.53715120929490  | 1.32486422508365  |
| H  | 0.10698631765122  | 2.15200004551192  | -0.84611029445321 |
| H  | 1.46095115194081  | 0.54585283082490  | -2.17333060504105 |
| H  | 3.63621694138678  | -0.31683238231398 | -1.33323915166191 |
| H  | 7.31919765251645  | -1.60632211832691 | 1.33205199655136  |
| H  | 7.64175362574946  | 0.11363854156854  | 1.02753366859626  |
| H  | 6.46780499521885  | -1.18383066948159 | 4.73801477862110  |
| H  | 7.11994879257719  | -2.26320764201930 | 3.47230142151008  |
| H  | 5.46872560795998  | -3.99266370306220 | 2.96090904111017  |
| H  | 3.04029434017871  | -4.64024114444976 | 2.75009084018558  |
| H  | 1.29368163828482  | -2.90909631518557 | 3.22621361520452  |
| H  | 8.78464913544272  | -0.10519419649614 | 3.31674636598553  |
| H  | 7.66500846913262  | 0.56198234674253  | 4.53675843424565  |
| H  | 10.09525157310909 | 2.03662008691616  | 3.14877907407135  |
| H  | 10.12691408082356 | 4.37080376828013  | 2.20282578784363  |
| H  | 7.97901074581167  | 5.36110154814044  | 1.37195012475702  |
| H  | 2.14927466996124  | 0.48109274627718  | 4.53795163144517  |
| H  | 0.85456617517945  | -0.74693207960386 | 4.40944580767626  |
| H  | 1.33084812716969  | 0.18522936803397  | 2.97862855259933  |
| H  | 4.99666649946174  | 3.44860242667080  | 0.75417981799433  |
| H  | 5.65093199243919  | 5.10831772856117  | 0.85526142416944  |
| H  | 4.84945440091614  | 4.37104848280674  | 2.26761356517866  |
| H  | 7.42496455666032  | 2.98486646813546  | 7.46781248337093  |
| H  | 7.83569593868534  | 2.85316948578926  | 5.73660022259192  |
| H  | 6.89042037327718  | 1.55897684498306  | 6.54526432588155  |
| H  | 5.06196449687597  | 5.37693506261767  | 5.66252601469866  |
| H  | 6.77375006861457  | 5.07725576369088  | 5.23778925533756  |
| H  | 6.29847894015915  | 5.29999469817984  | 6.94536068274577  |



|   |                  |                  |                  |
|---|------------------|------------------|------------------|
| H | 4.92480840315590 | 3.35428064831986 | 8.13281285198817 |
| H | 4.42457567740538 | 1.97356631940404 | 7.11806202160643 |
| H | 3.72041017440445 | 3.59393835028405 | 6.84009809675089 |

**[Mn<sup>III</sup>(OO<sup>t</sup>Bu)(<sup>6</sup>Me<sup>2</sup>dpaq)]<sup>+</sup> - triplet reactant (TPSSh)**

|    |                  |                   |                   |
|----|------------------|-------------------|-------------------|
| Mn | 5.14075903555799 | 1.01556131226635  | 2.83498299479633  |
| O  | 5.28178449546600 | 1.44451333469604  | 4.61474959211128  |
| O  | 5.67304034928825 | 2.82512541046400  | 4.84849740198820  |
| O  | 5.70301439600802 | -1.10111765199745 | -0.56748572867423 |
| N  | 3.50326428521013 | 2.05146762255439  | 2.40881378819481  |
| N  | 4.85519026202856 | 0.35987618703788  | 1.03260400390191  |
| N  | 6.77790826935678 | -0.18835533544393 | 2.77417872579333  |
| N  | 4.15102208025007 | -0.74478293082366 | 3.48804688316247  |
| N  | 6.59399717963443 | 2.39238269403808  | 2.27194344237939  |
| C  | 2.92966987381796 | 2.98823484096542  | 3.15351812090127  |
| C  | 1.70757162768719 | 3.58599319602940  | 2.78315029951055  |
| C  | 1.07779426059936 | 3.19345384094092  | 1.61544200246180  |
| C  | 1.67876673192455 | 2.20615095431123  | 0.78923483867889  |
| C  | 1.14145428501479 | 1.73392377174251  | -0.43907924164159 |
| C  | 1.83698352770365 | 0.78703331890395  | -1.17034276309300 |
| C  | 3.08444183566633 | 0.26701941732026  | -0.74496886948379 |
| C  | 3.63692488612705 | 0.70314358927614  | 0.45710388988187  |
| C  | 2.91788301849566 | 1.66367167755953  | 1.23020641812292  |
| C  | 5.77633170901534 | -0.48238497998602 | 0.48611767885421  |
| C  | 7.04693308172078 | -0.52369792585394 | 1.34040010173633  |
| C  | 6.47430196820307 | -1.39621347487117 | 3.56849937023562  |
| C  | 5.02840072122032 | -1.77884369522775 | 3.42654300670415  |
| C  | 4.62686819045242 | -3.10720181890994 | 3.36990816451914  |
| C  | 3.26039352825614 | -3.39379345146150 | 3.42690982054958  |
| C  | 2.37296437019993 | -2.34133835591568 | 3.61122469398495  |
| C  | 2.83827082643743 | -1.01639267711727 | 3.65773801530292  |
| C  | 7.84419057222418 | 0.63515879839126  | 3.38618111575195  |
| C  | 7.79128239453458 | 2.00957937819001  | 2.78219740557880  |
| C  | 8.92075833385463 | 2.82089762651041  | 2.75068061808230  |
| C  | 8.82089519257073 | 4.08280683260919  | 2.16740061928275  |
| C  | 7.61155952717449 | 4.44615222494303  | 1.58428488706594  |
| C  | 6.50956989570637 | 3.58044677862636  | 1.62565198374445  |
| C  | 1.87733976578164 | 0.09073248939650  | 3.97279288339576  |
| C  | 5.25033114983881 | 3.96620473121546  | 0.91191504585390  |
| C  | 5.76526288433484 | 3.04134444619234  | 6.28541553705633  |
| C  | 6.85102066793082 | 2.14001252585565  | 6.87506550095869  |
| C  | 6.16676495056500 | 4.51586920905846  | 6.34770194880301  |
| C  | 4.40638157545017 | 2.79568644104986  | 6.94204955640462  |
| H  | 3.46030179411020 | 3.26078228092224  | 4.06608710358415  |
| H  | 1.27279572890245 | 4.34924324397619  | 3.42974869554752  |
| H  | 0.12636628299255 | 3.63854398157358  | 1.31659862247106  |
| H  | 0.18878421533266 | 2.12992514735178  | -0.79512089353949 |
| H  | 1.42217084490777 | 0.42861504979935  | -2.11472651256303 |
| H  | 3.62086322589229 | -0.46276138336231 | -1.34799623366892 |
| H  | 7.53347123096570 | -1.50533621364470 | 1.25425539017909  |
| H  | 7.73382632954605 | 0.23221519677148  | 0.93357753876828  |
| H  | 6.64169060856110 | -1.14223352068992 | 4.62579638839566  |
| H  | 7.14262928353432 | -2.22948361625332 | 3.30339771411737  |
| H  | 5.37240229527379 | -3.89960475094755 | 3.29434696139954  |
| H  | 2.90238559707800 | -4.42309302584958 | 3.36576272743434  |
| H  | 1.30461951304555 | -2.52601104226168 | 3.73126257105154  |
| H  | 8.84143063538825 | 0.18394897026486  | 3.25172127815002  |
| H  | 7.62357668731621 | 0.70058194488231  | 4.46048032694206  |
| H  | 9.85999363732731 | 2.45943850651529  | 3.17156122207446  |
| H  | 9.68019070809919 | 4.75521877478713  | 2.13610454237770  |
| H  | 7.50618094393667 | 5.40213554676282  | 1.07028783604629  |
| H  | 2.37425960798926 | 0.86749416482446  | 4.56401184210400  |
| H  | 1.03370327774303 | -0.31418153231108 | 4.54756005301469  |
| H  | 1.46616094813424 | 0.54800788727691  | 3.06112408815473  |
| H  | 4.83472260692034 | 3.11249246921413  | 0.36369603241713  |
| H  | 5.46262258128469 | 4.77374518628671  | 0.19990331567691  |
| H  | 4.48625177988464 | 4.32652528411066  | 1.61453712975635  |
| H  | 6.97555405334907 | 2.34134983778672  | 7.94952682026454  |
| H  | 7.81532996919374 | 2.32582589006530  | 6.37701285993500  |

|   |                  |                  |                  |
|---|------------------|------------------|------------------|
| H | 6.57930207680296 | 1.08141377380950 | 6.75449577142673 |
| H | 5.39491864888752 | 5.14900314566440 | 5.88566509936580 |
| H | 7.11866842384632 | 4.68075004940420 | 5.82141398224967 |
| H | 6.28809587308894 | 4.82524798893000 | 7.39627303665238 |
| H | 4.46307820991079 | 2.99304971672972 | 8.02304673732958 |
| H | 4.09153044407775 | 1.75314587769062 | 6.79442910036398 |
| H | 3.64259923136724 | 3.46277781738317 | 6.51294609966242 |

**[Mn<sup>III</sup>(OO<sup>t</sup>Bu)(<sup>6</sup>Me<sub>2</sub>dpaq)]<sup>+</sup> - singlet reactant (TPSSh)**

|    |                  |                   |                   |
|----|------------------|-------------------|-------------------|
| Mn | 5.13198044086733 | 1.03958537667641  | 2.84931909295934  |
| O  | 5.23939897443504 | 1.51059036168379  | 4.59411057990898  |
| O  | 5.75639120972548 | 2.83319079062451  | 4.87967871098565  |
| O  | 5.71569872626664 | -1.13764527957201 | -0.53279177430475 |
| N  | 3.49330720692576 | 2.05670332392069  | 2.37272148383797  |
| N  | 4.84998701030644 | 0.33860660934777  | 1.04559736372785  |
| N  | 6.77487252350836 | -0.15073481887075 | 2.79173706020276  |
| N  | 4.15468716807135 | -0.71986164324869 | 3.51402748667136  |
| N  | 6.57824708474539 | 2.42369506055206  | 2.25722423868730  |
| C  | 2.91450284444666 | 3.00639790068366  | 3.09687392259593  |
| C  | 1.69108457618989 | 3.59154162140584  | 2.71208388672294  |
| C  | 1.06747165718233 | 3.17383100007186  | 1.54958121921811  |
| C  | 1.67353772842089 | 2.17202640076878  | 0.74547015829428  |
| C  | 1.14240389827398 | 1.67307385461419  | -0.47440613513430 |
| C  | 1.84379294969537 | 0.71162216105421  | -1.18161278509439 |
| C  | 3.08926316650753 | 0.20193226994000  | -0.73969836830758 |
| C  | 3.63718125914180 | 0.66442904644531  | 0.45569126786117  |
| C  | 2.91240406596069 | 1.64111805950581  | 1.20285692967789  |
| C  | 5.77866111386312 | -0.50077970571002 | 0.51160168625504  |
| C  | 7.05027697641745 | -0.50962329557256 | 1.36487775132457  |
| C  | 6.48061422695531 | -1.34961571430741 | 3.60572250750450  |
| C  | 5.03927725480140 | -1.74813202104043 | 3.46680795730216  |
| C  | 4.64894936869539 | -3.08018161994713 | 3.42300792199072  |
| C  | 3.28446182576632 | -3.37691296882622 | 3.47706748567069  |
| C  | 2.38794405037803 | -2.32913713785776 | 3.64304563104012  |
| C  | 2.84311257371901 | -1.00021955669222 | 3.67666167717218  |
| C  | 7.83707879469986 | 0.68802974847689  | 3.39214793260918  |
| C  | 7.78045302501405 | 2.05130141610678  | 2.76348195640209  |
| C  | 8.91159321123158 | 2.85856397795914  | 2.70551299211164  |
| C  | 8.80929436916512 | 4.10892338837009  | 2.09815804417231  |
| C  | 7.59545737523000 | 4.46143842721167  | 1.51820661431605  |
| C  | 6.49267889965982 | 3.59784990841929  | 1.58594132905440  |
| C  | 1.87064811869473 | 0.10426216086654  | 3.96605329056353  |
| C  | 5.23012147781035 | 3.97156110291466  | 0.87108244170168  |
| C  | 5.78926934648584 | 3.02063629596496  | 6.32624133581411  |
| C  | 6.73800019624132 | 2.00087743355400  | 6.95703119108509  |
| C  | 6.33860634306695 | 4.44329372757149  | 6.43829126496410  |
| C  | 4.37609274622904 | 2.91187905989703  | 6.89911599949713  |
| H  | 3.43745175343601 | 3.29985413446705  | 4.00714685231843  |
| H  | 1.25102254108288 | 4.36543276774122  | 3.34220466842786  |
| H  | 0.11584813234428 | 3.61024262874184  | 1.23867390440462  |
| H  | 0.19036655356917 | 2.05891472895521  | -0.84295983140254 |
| H  | 1.43373246388185 | 0.33215227769576  | -2.11987710759649 |
| H  | 3.62872375626113 | -0.54055533990477 | -1.32419771986561 |
| H  | 7.55140018411252 | -1.48544444417444 | 1.29961146550754  |
| H  | 7.72621741504894 | 0.24871110325830  | 0.94457854108316  |
| H  | 6.64462024444609 | -1.07680693382688 | 4.65893864771177  |
| H  | 7.15847994017911 | -2.17924580021239 | 3.35415651701681  |
| H  | 5.40097474265451 | -3.86745366280141 | 3.35886291048421  |
| H  | 2.93481312029082 | -4.40962959269412 | 3.42645519817579  |
| H  | 1.32019020457871 | -2.52070154961923 | 3.75758084681852  |
| H  | 8.83578039985402 | 0.23762228617812  | 3.26739076590166  |
| H  | 7.61627931657550 | 0.76889146319328  | 4.46546379852084  |
| H  | 9.85393868728008 | 2.50298269973135  | 3.12450542674081  |
| H  | 9.66930808614605 | 4.77905428373586  | 2.04564239604200  |
| H  | 7.48700460779865 | 5.40669341262445  | 0.98528533728786  |
| H  | 2.35602699830696 | 0.89733335303781  | 4.54514595954324  |
| H  | 1.02680844700109 | -0.29643624883567 | 4.54350437735387  |
| H  | 1.46125162553346 | 0.54055381358083  | 3.04327750172342  |
| H  | 4.81296932831839 | 3.10882600655460  | 0.33832061086283  |

|   |                  |                  |                  |
|---|------------------|------------------|------------------|
| H | 5.43937822682084 | 4.76731212937627 | 0.14503746974898 |
| H | 4.46779305974944 | 4.34323569906193 | 1.56969852988224 |
| H | 6.81145323763307 | 2.16635800267870 | 8.04220684218602 |
| H | 7.74741366068745 | 2.09754708523643 | 6.52781668210522 |
| H | 6.36972968153235 | 0.97821305850097 | 6.79060878506898 |
| H | 5.66701704489336 | 5.15940891708029 | 5.94241258510422 |
| H | 7.33305694491629 | 4.51296647639376 | 5.97319177799663 |
| H | 6.42746933384064 | 4.72549506064519 | 7.49773965620438 |
| H | 4.39014224790047 | 3.09268430637773 | 7.98434975381622 |
| H | 3.96327902721964 | 1.90917237214625 | 6.71967315021528 |
| H | 3.71302420130431 | 3.65959178211177 | 6.43709335154525 |

**[Mn<sup>III</sup>(OO'Bu)<sup>(6Me)dpq</sup>]<sup>+</sup> - quintet transition state (TPSSh)**

|    |                   |                   |                   |
|----|-------------------|-------------------|-------------------|
| Mn | 0.13800165832112  | -0.39764204314679 | 0.00587152778875  |
| O  | 0.16431550017976  | -0.10284960346657 | 1.65580961070460  |
| O  | 0.47094389885746  | 2.23831921450157  | 1.73701771222103  |
| O  | 0.64275803428513  | -2.40177146778595 | -3.50867747857203 |
| N  | -1.57542185943849 | 0.60207743203149  | -0.38517976809631 |
| N  | -0.12293038351223 | -0.95141490897776 | -1.85957918000667 |
| N  | 1.76292395877617  | -1.78333320404351 | -0.10030715675956 |
| N  | -0.92181540400070 | -2.59014990637464 | 0.41308450202073  |
| N  | 1.87185932467779  | 0.85706284350266  | -0.53601398296703 |
| C  | -2.22237769818932 | 1.39584718736731  | 0.45823834684295  |
| C  | -3.43994542998894 | 2.00399500762310  | 0.10102095640761  |
| C  | -3.98128911741162 | 1.75761004985539  | -1.14923689627107 |
| C  | -3.30810507197846 | 0.90625629701055  | -2.06442222317032 |
| C  | -3.78317507322170 | 0.56445053233030  | -3.35902392420944 |
| C  | -3.03779569719129 | -0.28962700835218 | -4.15214686634304 |
| C  | -1.80369783905009 | -0.83956380827197 | -3.72498656832299 |
| C  | -1.30503475772560 | -0.52719089144190 | -2.46112566243416 |
| C  | -2.07344323675169 | 0.34649087621710  | -1.63318009599012 |
| C  | 0.74030198444727  | -1.85673056271993 | -2.41819334427869 |
| C  | 1.97368429567765  | -2.10355967452618 | -1.54446192671740 |
| C  | 1.43258685736558  | -2.99170098222991 | 0.69120965830678  |
| C  | 0.05842168963531  | -3.50955064553721 | 0.35337914188331  |
| C  | -0.18286706969098 | -4.85167890965197 | 0.07343408944561  |
| C  | -1.50570843410988 | -5.25635763657819 | -0.13312862405302 |
| C  | -2.51984069868486 | -4.31105589216804 | -0.02670154360801 |
| C  | -2.20028179146295 | -2.97160314965489 | 0.25430579733188  |
| C  | 2.91288875724059  | -1.06433593304620 | 0.49104203201876  |
| C  | 3.02407110030153  | 0.31298584609261  | -0.11163491965165 |
| C  | 4.23902957219387  | 0.98891047037266  | -0.19846132004167 |
| C  | 4.24109150996147  | 2.27834713141136  | -0.73285634225095 |
| C  | 3.04069354646405  | 2.82874558407714  | -1.17795955054223 |
| C  | 1.85485696947370  | 2.09172291349848  | -1.07627287621648 |
| C  | -3.28654731895792 | -1.94548640771133 | 0.40560739819427  |
| C  | 0.54924937679163  | 2.64605128730294  | -1.55855514910326 |
| C  | 0.92242669233538  | 2.41951296727668  | 3.03761248492575  |
| C  | 2.24318003339912  | 1.67257162066022  | 3.26221841765087  |
| C  | 1.16457263939016  | 3.96037523038261  | 3.07852346042516  |
| C  | -0.15925232483030 | 2.01887195563877  | 4.05004300498007  |
| H  | -1.74332987021451 | 1.54693094145178  | 1.42555305435957  |
| H  | -3.94039140238691 | 2.65403642471982  | 0.81929633589687  |
| H  | -4.93169476430037 | 2.21028504275567  | -1.43992442461612 |
| H  | -4.73053772329838 | 0.97714361019017  | -3.70945523822512 |
| H  | -3.40498568879038 | -0.55582417977698 | -5.14526170295126 |
| H  | -1.23978760673516 | -1.50790761839560 | -4.37192835536249 |
| H  | 2.30560388894837  | -3.14418008427219 | -1.66922122003429 |
| H  | 2.77080723535285  | -1.45226664786702 | -1.93196354225714 |
| H  | 1.44105653598071  | -2.69215601629537 | 1.74954327907962  |
| H  | 2.19681997643673  | -3.77109894930809 | 0.53973008604447  |
| H  | 0.64160778813968  | -5.56483946492308 | 0.02810211852140  |
| H  | -1.73976005332641 | -6.29850750244004 | -0.35813555842976 |
| H  | -3.56584330095889 | -4.59559348250671 | -0.15137552074965 |
| H  | 3.85101955682667  | -1.62849804426546 | 0.35920807860959  |
| H  | 2.71419742827219  | -0.97048198007984 | 1.56912418804910  |
| H  | 5.15896853585777  | 0.51210628665195  | 0.14328312177552  |
| H  | 5.17153843667498  | 2.84245528902110  | -0.81626267388506 |
| H  | 3.01025149565674  | 3.82638301345581  | -1.61757051413456 |

|   |                   |                   |                   |
|---|-------------------|-------------------|-------------------|
| H | -2.96318482703239 | -1.13812038427448 | 1.07174860265056  |
| H | -4.19533619774800 | -2.40683998274543 | 0.81488381636536  |
| H | -3.54925923325256 | -1.50945964130452 | -0.57100992174203 |
| H | 0.04436125134514  | 1.93050568945415  | -2.22228489361728 |
| H | 0.70487713263735  | 3.58389785140549  | -2.10587365256937 |
| H | -0.11172326087342 | 2.84558183423476  | -0.70302830463108 |
| H | 2.65490749410158  | 1.88217799731830  | 4.26019236537501  |
| H | 2.98010303728361  | 1.97021656321836  | 2.50147741348980  |
| H | 2.05691480049992  | 0.59194104321474  | 3.17701797695009  |
| H | 0.23134480898126  | 4.50606704142731  | 2.88424335506189  |
| H | 1.92198519842407  | 4.25213706843632  | 2.33800225568935  |
| H | 1.52734552640096  | 4.21339783994033  | 4.08653580806531  |
| H | 0.17675537110357  | 2.20353019483725  | 5.08114839648527  |
| H | -0.38230307960887 | 0.94838773322370  | 3.93485204786363  |
| H | -1.08065668397562 | 2.59399070202999  | 3.87304048133071  |

**[Mn<sup>III</sup>(OO'Bu)(<sup>6</sup>Me dpaq)]<sup>+</sup> - triplet transition state (TPSSh)**

|    |                  |                   |                   |
|----|------------------|-------------------|-------------------|
| Mn | 5.10721573368899 | 0.91898372451310  | 2.92306871348550  |
| O  | 5.24242316635697 | 1.25750573844782  | 4.53690309311769  |
| O  | 5.56749404059772 | 3.33881929384643  | 4.86085444199523  |
| O  | 5.71476371907042 | -1.06831693626959 | -0.59282753977577 |
| N  | 3.46923393979590 | 1.95789087091368  | 2.48666162848988  |
| N  | 4.85149941628881 | 0.33136941930802  | 1.05759733732508  |
| N  | 6.72419073174626 | -0.31731545083826 | 2.80925537539435  |
| N  | 4.05687960280737 | -0.90314044923500 | 3.37465268001123  |
| N  | 6.59793822953013 | 2.26946005350257  | 2.39939652039309  |
| C  | 2.87900571787716 | 2.85569526523091  | 3.26614380758561  |
| C  | 1.66404170664332 | 3.46805508983922  | 2.89584943447897  |
| C  | 1.06139450586908 | 3.13146312450308  | 1.69699394265623  |
| C  | 1.67978667328579 | 2.18298244279531  | 0.83905073441042  |
| C  | 1.16374902372827 | 1.76221476555794  | -0.41694067668398 |
| C  | 1.86982057532037 | 0.84382484753427  | -1.17411057946290 |
| C  | 3.10865331007766 | 0.30581851666154  | -0.74785539161656 |
| C  | 3.64314541874481 | 0.69396053666516  | 0.47920547432074  |
| C  | 2.91143406569098 | 1.62215939558300  | 1.27971066676790  |
| C  | 5.76999387777714 | -0.49832767656177 | 0.48940489966234  |
| C  | 7.01816823737510 | -0.60048407482905 | 1.36933189510162  |
| C  | 6.37736262502035 | -1.54905535371269 | 3.54513151185834  |
| C  | 4.94420784462017 | -1.92689836444680 | 3.29753809744741  |
| C  | 4.55593830733548 | -3.24940234696043 | 3.12820415265283  |
| C  | 3.19042443651538 | -3.54323285572539 | 3.08147853082011  |
| C  | 2.28729424542687 | -2.50856335564703 | 3.28528612545255  |
| C  | 2.73981656760324 | -1.18801601209612 | 3.45263448693953  |
| C  | 7.80103043431518 | 0.45597391806215  | 3.46643434786723  |
| C  | 7.78379137434723 | 1.84808470218508  | 2.90358989403819  |
| C  | 8.92777622000472 | 2.63805067919405  | 2.89903470569513  |
| C  | 8.85237901835464 | 3.91986399293751  | 2.35559049672175  |
| C  | 7.64992426781003 | 4.32713802051010  | 1.78986803875014  |
| C  | 6.53079698019950 | 3.48229832055671  | 1.80338987911561  |
| C  | 1.75394834661898 | -0.11353436824857 | 3.80497602951008  |
| C  | 5.27314764408852 | 3.92439006181356  | 1.12268763220646  |
| C  | 5.83939324591253 | 3.46130622628085  | 6.22630977449450  |
| C  | 7.10000387544434 | 2.67666174039965  | 6.61460257050829  |
| C  | 6.10491497504963 | 4.98917921727723  | 6.34816892279878  |
| C  | 4.62718692216746 | 3.05776680483244  | 7.07558571248631  |
| H  | 3.39993890060348 | 3.08963736447322  | 4.19577201172796  |
| H  | 1.21362960460994 | 4.19934968752510  | 3.56804735078860  |
| H  | 0.11610415680861 | 3.58991717596604  | 1.39831798338227  |
| H  | 0.21706012208902 | 2.17341946027741  | -0.77179896983317 |
| H  | 1.47045571049075 | 0.52395814465973  | -2.13880635764277 |
| H  | 3.65540203505536 | -0.40060114425079 | -1.36916080990377 |
| H  | 7.48637046598288 | -1.58837349821507 | 1.25699277638132  |
| H  | 7.73048044630739 | 0.15527014566975  | 1.00894576037593  |
| H  | 6.48043303863951 | -1.32766531012861 | 4.61794832757208  |
| H  | 7.06246757109104 | -2.37251846275860 | 3.29190015280679  |
| H  | 5.31022042830153 | -4.03285356013048 | 3.04626121515493  |
| H  | 2.84376758617630 | -4.56674675437595 | 2.92837377814634  |
| H  | 1.21503990864151 | -2.70386680371166 | 3.33141248325380  |
| H  | 8.78660505642406 | -0.01791048871931 | 3.32707365492157  |

|   |                  |                   |                  |
|---|------------------|-------------------|------------------|
| H | 7.56802123728572 | 0.49478940441968  | 4.53899956670167 |
| H | 9.85920848860304 | 2.24572005996561  | 3.30941665608796 |
| H | 9.72500210839511 | 4.57549003734718  | 2.34490613733740 |
| H | 7.56062169180038 | 5.30362682235340  | 1.31278664807265 |
| H | 2.21869875246938 | 0.63003559731449  | 4.46108711525652 |
| H | 0.89983372185434 | -0.56595476140640 | 4.32657636915516 |
| H | 1.36186085714498 | 0.39617376290423  | 2.91318009751216 |
| H | 4.85004003423276 | 3.11188787149437  | 0.52008949011024 |
| H | 5.48769866471872 | 4.77688737558715  | 0.46624909169339 |
| H | 4.51871728556611 | 4.23989199059641  | 1.85603317514333 |
| H | 7.39624909136414 | 2.89232400594130  | 7.65243550961132 |
| H | 7.93229280851781 | 2.94513123785981  | 5.94655339431656 |
| H | 6.90283443912800 | 1.59820637286164  | 6.52692633637794 |
| H | 5.22088660506193 | 5.56168097394611  | 6.03464875433447 |
| H | 6.96476836159673 | 5.28285338368005  | 5.72996951640571 |
| H | 6.32403039282551 | 5.21848220306291  | 7.40239544231312 |
| H | 4.83202173583835 | 3.19955670005630  | 8.14788248892486 |
| H | 4.39088903496056 | 1.99877529724276  | 6.89723249829805 |
| H | 3.74994963430571 | 3.66588918411073  | 6.80655598819406 |

**[Mn<sup>III</sup>(OO'Bu)(<sup>6</sup>Me dpaq)]<sup>+</sup> - singlet transition state (TPSSh)**

|    |                   |                   |                   |
|----|-------------------|-------------------|-------------------|
| Mn | 0.24383367329457  | -0.43717688209331 | -0.10720799643308 |
| O  | 0.42979770777674  | -0.06808887251364 | 1.47807222025509  |
| O  | 0.64949804066336  | 1.77766037835390  | 1.84162490848343  |
| O  | 0.73242510748146  | -2.61088396267457 | -3.54540154364574 |
| N  | -1.36481962028082 | 0.61704890006720  | -0.58261567785794 |
| N  | -0.05948183035666 | -1.10145436820224 | -1.95673802955332 |
| N  | 1.86116064555417  | -1.66959915382330 | -0.22883402068746 |
| N  | -0.76630528080210 | -2.22848772128270 | 0.42728766696962  |
| N  | 1.71730122824501  | 0.92564445712039  | -0.72557970916641 |
| C  | -1.91606601673790 | 1.55297648260869  | 0.18181444469577  |
| C  | -3.11190618116440 | 2.19630957243448  | -0.19727030443926 |
| C  | -3.73330608069672 | 1.85180627356086  | -1.38460944925026 |
| C  | -3.15394580991800 | 0.86419896299278  | -2.22530280884528 |
| C  | -3.68532390484380 | 0.43783433241851  | -3.47232150547629 |
| C  | -3.01014818892467 | -0.51882883640804 | -4.21123696573544 |
| C  | -1.79144987116427 | -1.09316377054451 | -3.77494371815894 |
| C  | -1.24378250911739 | -0.70191204726011 | -2.55399200587222 |
| C  | -1.94137061635344 | 0.26897414146350  | -1.77637803425740 |
| C  | 0.82451739278828  | -1.98222882325430 | -2.49827986837432 |
| C  | 2.10472487251815  | -2.03619708656511 | -1.65934260333355 |
| C  | 1.54955861521203  | -2.86070942114253 | 0.58836873933863  |
| C  | 0.11596113647673  | -3.25857074350110 | 0.39895985022183  |
| C  | -0.27737074238646 | -4.58772713495270 | 0.32328892474264  |
| C  | -1.64392393368848 | -4.87958883642838 | 0.32190338012920  |
| C  | -2.54053639310734 | -3.82993978350061 | 0.47066038432004  |
| C  | -2.08385934276262 | -2.50233586039572 | 0.54115415458864  |
| C  | 2.95819514513353  | -0.86236453703784 | 0.35325884197759  |
| C  | 2.91866181142831  | 0.51067540555676  | -0.25408977102900 |
| C  | 4.06848703670592  | 1.29019690805141  | -0.31754660068970 |
| C  | 3.98450684343749  | 2.55892039914008  | -0.88763974080233 |
| C  | 2.76623501216361  | 2.95886559113262  | -1.42386651337998 |
| C  | 1.64255274408088  | 2.12282388058218  | -1.35523555636376 |
| C  | -3.06698739370633 | -1.40459650472689 | 0.82313566225491  |
| C  | 0.37610972999448  | 2.56127059591004  | -2.02306041201195 |
| C  | 0.82860169249472  | 1.90824292363628  | 3.23871675929446  |
| C  | 2.07548848589472  | 1.14314838425092  | 3.70444907519393  |
| C  | 1.04074622978349  | 3.42807498354237  | 3.40999757560244  |
| C  | -0.42441026900799 | 1.44955147534089  | 3.99706108269247  |
| H  | -1.37005550136622 | 1.79602505709077  | 1.09639119219984  |
| H  | -3.53140240816866 | 2.96020326959894  | 0.45842088163782  |
| H  | -4.66381648659386 | 2.33639436760445  | -1.68862821480965 |
| H  | -4.61712980597879 | 0.87464121907177  | -3.83558842420835 |
| H  | -3.42053079289286 | -0.84257523629752 | -5.17002619490242 |
| H  | -1.27188892265873 | -1.83212845227177 | -4.38159678725945 |
| H  | 2.57418997364887  | -3.02719718225642 | -1.72834932038956 |
| H  | 2.7987749564673   | -1.29907733988275 | -2.08787259157253 |
| H  | 1.67909154732575  | -2.57430780901823 | 1.64264629901486  |
| H  | 2.23836947601923  | -3.68889106772745 | 0.36320653581269  |

|   |                   |                   |                   |
|---|-------------------|-------------------|-------------------|
| H | 0.47419281406939  | -5.37666434198281 | 0.27802836417770  |
| H | -1.99601202692300 | -5.90964099748493 | 0.24393540049934  |
| H | -3.61239649428210 | -4.01773810095054 | 0.54592100708458  |
| H | 3.93919255410628  | -1.33846743803277 | 0.19260100494828  |
| H | 2.77039814249415  | -0.78715377878420 | 1.43375091799542  |
| H | 5.00996557549294  | 0.89944968536962  | 0.07087678228994  |
| H | 4.85994000423092  | 3.20843754645804  | -0.94261828264285 |
| H | 2.66741855153924  | 3.92346028229792  | -1.92272582606934 |
| H | -2.61100119886757 | -0.63236153725696 | 1.45238973214220  |
| H | -3.93444706949929 | -1.82469112906847 | 1.34909636041569  |
| H | -3.43660092087646 | -0.93535434167959 | -0.09989960888688 |
| H | -0.05781345804881 | 1.74549616692261  | -2.61348187051208 |
| H | 0.58699465704780  | 3.40466792608197  | -2.69216364015276 |
| H | -0.36872774208968 | 2.89062001184257  | -1.28638579428146 |
| H | 2.28070193411761  | 1.33084806322494  | 4.76963335692506  |
| H | 2.95325122149917  | 1.45958289641412  | 3.11993851136784  |
| H | 1.92677214332271  | 0.06114546665466  | 3.57089268650964  |
| H | 0.16020498966001  | 3.98244407477667  | 3.05383971261769  |
| H | 1.92136406473402  | 3.75894075807182  | 2.84042773204486  |
| H | 1.19788320099505  | 3.66201284467706  | 4.47473869323177  |
| H | -0.30987071658157 | 1.60156683035234  | 5.08151302814505  |
| H | -0.60549332694007 | 0.38042579701745  | 3.81147206349885  |
| H | -1.30489064029050 | 2.01951678731039  | 3.66135545773117  |

**[Mn<sup>III</sup>(OO'Bu)(<sup>6</sup>Me dpaq)]<sup>+</sup> - quintet product complex (TPSSh)**

|    |                  |                   |                   |
|----|------------------|-------------------|-------------------|
| Mn | 5.08291308583106 | 0.91085699507267  | 3.09702561566434  |
| O  | 5.08132526284417 | 1.01492116344160  | 4.73664463960812  |
| O  | 5.34269807904718 | 4.14693158174536  | 4.71194165129267  |
| O  | 5.54001207519987 | -1.00503827525094 | -0.49452097239812 |
| N  | 3.39414565491959 | 1.92585920558463  | 2.75463918417928  |
| N  | 4.80899911001597 | 0.44463182781994  | 1.17303707223577  |
| N  | 6.60565507003256 | -0.49304015703594 | 2.96451179590528  |
| N  | 3.92328484309826 | -1.32918500302252 | 3.27309495498794  |
| N  | 6.66815409526975 | 2.12904669592254  | 2.60558380562121  |
| C  | 2.75065498308136 | 2.66885106171218  | 3.64912254573517  |
| C  | 1.53939880121406 | 3.31076205172162  | 3.33009507665677  |
| C  | 0.99358179235184 | 3.14924589845497  | 2.06802436735393  |
| C  | 1.65281868863740 | 2.34477973253475  | 1.10238857366788  |
| C  | 1.16376108089070 | 2.08402263625547  | -0.20575330189430 |
| C  | 1.88974853561269 | 1.26375773749842  | -1.05238355082507 |
| C  | 3.11870146659084 | 0.67557641383800  | -0.66709323834355 |
| C  | 3.63475227535936 | 0.91388545152591  | 0.60715562790716  |
| C  | 2.88431648365237 | 1.74719389831568  | 1.49278145951671  |
| C  | 5.63008362889815 | -0.48106243729680 | 0.60888641207838  |
| C  | 6.83110141271264 | -0.80665660119201 | 1.51202133962323  |
| C  | 6.25180003435877 | -1.70175963524426 | 3.74916002712597  |
| C  | 4.91312098893846 | -2.24046048519276 | 3.33250167541119  |
| C  | 4.71156855836006 | -3.59794555041669 | 3.09768722456164  |
| C  | 3.41490421537595 | -4.03496648795208 | 2.81404831211726  |
| C  | 2.38610544267146 | -3.10056927081524 | 2.80318216310595  |
| C  | 2.66566312081313 | -1.74229137171194 | 3.03838758140514  |
| C  | 7.75117520965676 | 0.20814370624621  | 3.58879155107536  |
| C  | 7.84583659531948 | 1.58320454929487  | 2.99933067187448  |
| C  | 9.05493643563185 | 2.25430585354083  | 2.86825238443348  |
| C  | 9.05041718701032 | 3.53929391557202  | 2.32416729999029  |
| C  | 7.84155033640418 | 4.07877149028733  | 1.89999902962679  |
| C  | 6.64727833568124 | 3.35614383132886  | 2.03363851850642  |
| C  | 1.54881852211884 | -0.73862183526418 | 3.04702831517661  |
| C  | 5.36448919954833 | 3.92807956679100  | 1.52442257064380  |
| C  | 5.84149629220117 | 4.17408209514992  | 6.00411128569661  |
| C  | 7.15502428236812 | 3.38194410194999  | 6.09744802578409  |
| C  | 6.11589033730983 | 5.69685226262459  | 6.21468476894826  |
| C  | 4.79411205937732 | 3.67504442938926  | 7.01132172450354  |
| H  | 3.22033497746300 | 2.74955896197327  | 4.62771273398375  |
| H  | 1.04570034901149 | 3.92033794865398  | 4.08734691551367  |
| H  | 0.04895054818198 | 3.63129903770298  | 1.80606200778197  |
| H  | 0.22126166788129 | 2.53130438630897  | -0.52589260790863 |
| H  | 1.51090082067482 | 1.05961449558184  | -2.05599064264482 |
| H  | 3.66943741503755 | 0.03385914657734  | -1.35197795600775 |

|   |                  |                   |                  |
|---|------------------|-------------------|------------------|
| H | 7.09928808399106 | -1.86497957831113 | 1.39085367370987 |
| H | 7.67847900759702 | -0.20320964295072 | 1.15539170250463 |
| H | 6.19574103164970 | -1.38703688107287 | 4.80122633030245 |
| H | 7.04046952835401 | -2.46303477684042 | 3.64017627364513 |
| H | 5.54847071059489 | -4.29631544672236 | 3.14520315467290 |
| H | 3.21253671411576 | -5.08979969693213 | 2.61936506399603 |
| H | 1.35586961474576 | -3.40739970651682 | 2.61580328790028 |
| H | 8.69018655035296 | -0.35289504525813 | 3.45695007953939 |
| H | 7.52930289948217 | 0.28764847296210  | 4.66378819446664 |
| H | 9.97904622164672 | 1.77075064312284  | 3.18676139212987 |
| H | 9.97963758869730 | 4.10123422665831  | 2.21427082059728 |
| H | 7.80083247377274 | 5.06837512498278  | 1.44464190680557 |
| H | 1.78361004234521 | 0.09933809710979  | 3.71281742650205 |
| H | 0.61622990019302 | -1.21166438932630 | 3.38375098174663 |
| H | 1.37221544186586 | -0.34552129614197 | 2.03387832482750 |
| H | 4.87434118344205 | 3.22565754380731  | 0.83750379344835 |
| H | 5.56016490941852 | 4.86397665597261  | 0.98757105479711 |
| H | 4.68629654337352 | 4.14062449708146  | 2.36081702090446 |
| H | 7.59834429513326 | 3.47417112614854  | 7.10059862000541 |
| H | 7.87717666241921 | 3.75146704713353  | 5.35451384333638 |
| H | 6.94295579205408 | 2.32069125469549  | 5.90162483357471 |
| H | 5.18637447087064 | 6.27349000248846  | 6.11583749691770 |
| H | 6.85227539734769 | 6.05996142074231  | 5.48482277394970 |
| H | 6.51688147063368 | 5.82639625049591  | 7.23141223310800 |
| H | 5.16960343059299 | 3.76164498909818  | 8.04243247908198 |
| H | 4.56881461685909 | 2.61752613990326  | 6.80855554183028 |
| H | 3.86974506179202 | 4.26543094764730  | 6.92486605641930 |

**[Mn<sup>III</sup>(OO<sup>t</sup>Bu)(<sup>6</sup>Me<sub>2</sub>dpaq)]<sup>+</sup> - triplet product complex (TPSSh)**

|    |                  |                   |                   |
|----|------------------|-------------------|-------------------|
| Mn | 5.06763735486044 | 0.88033591321520  | 3.06753978901170  |
| O  | 5.17142756333878 | 0.98096336001409  | 4.66612777458249  |
| O  | 5.31120917427620 | 4.25292228935040  | 4.78750436456013  |
| O  | 5.60059014725278 | -1.02843177215159 | -0.53618565820489 |
| N  | 3.41542900511773 | 1.92561872058195  | 2.65352791393867  |
| N  | 4.81618995430789 | 0.36895040037629  | 1.15463539097930  |
| N  | 6.64157591724085 | -0.51079080053259 | 2.91061411778254  |
| N  | 3.91413171624958 | -1.27785716637574 | 3.32649402340369  |
| N  | 6.66124661970765 | 2.13509298277423  | 2.62473149871845  |
| C  | 2.77735801869371 | 2.72736553810811  | 3.50097396824325  |
| C  | 1.55489356440764 | 3.33878748014080  | 3.16140351539637  |
| C  | 0.99384995844176 | 3.10559145702662  | 1.91883603924292  |
| C  | 1.65122216714967 | 2.25044652787011  | 0.99685195334701  |
| C  | 1.15702367911227 | 1.91753035362743  | -0.29366996657094 |
| C  | 1.87900078675774 | 1.05535075711181  | -1.09960979022853 |
| C  | 3.11023848707530 | 0.48832030857813  | -0.68864947286223 |
| C  | 3.62930314828098 | 0.79577347290249  | 0.56818281285370  |
| C  | 2.88473332494884 | 1.67523853957136  | 1.41192822705531  |
| C  | 5.68062521546665 | -0.51302668076827 | 0.57097071404814  |
| C  | 6.89748848626019 | -0.78403576125728 | 1.46154970514478  |
| C  | 2.6555521448516  | -1.74125907164553 | 3.64759982499677  |
| C  | 4.88631386335049 | -2.21163185096441 | 3.26794516028409  |
| C  | 4.62630871573996 | -3.54423644129197 | 2.96251011877994  |
| C  | 3.30102361249966 | -3.92851447735549 | 2.73587537302081  |
| C  | 2.29897411071863 | -2.97372561771024 | 2.85911928961728  |
| C  | 2.63146440052428 | -1.64116582311412 | 3.16292882705156  |
| C  | 7.77329105778860 | 0.18845319685915  | 3.56003738243245  |
| C  | 7.84333396770952 | 1.58599572976248  | 3.01110753218078  |
| C  | 9.05095287543543 | 2.26502349211571  | 2.90475959616197  |
| C  | 9.04907362864952 | 3.56102835101750  | 2.38815490975025  |
| C  | 7.84264938596016 | 4.10222117989433  | 1.96113199408132  |
| C  | 6.65021784810177 | 3.37173923590956  | 2.07206898257345  |
| C  | 1.55325672064059 | -0.61212600155616 | 3.34079708540859  |
| C  | 5.37412245652274 | 3.95327377041428  | 1.55470965070142  |
| C  | 5.83592867448928 | 4.20116906924984  | 6.06807336773483  |
| C  | 7.18172959187386 | 3.45809142548870  | 6.07310674740415  |
| C  | 6.05865705024107 | 5.71306075462310  | 6.39127842499263  |
| C  | 4.83051516987503 | 3.58567802264205  | 7.05350964298677  |
| H  | 3.25806730081411 | 2.89585948171986  | 4.46307134040116  |
| H  | 1.07051444125191 | 3.99004482820918  | 3.88955059036557  |

|   |                  |                   |                   |
|---|------------------|-------------------|-------------------|
| H | 0.04566280511521 | 3.56955824968487  | 1.63855429712347  |
| H | 0.21091653066852 | 2.34403824055735  | -0.63133645046673 |
| H | 1.49548261833497 | 0.79802277161697  | -2.08905480382110 |
| H | 3.65904175985859 | -0.18608235606610 | -1.34237587670695 |
| H | 7.23731980318121 | -1.81915024393159 | 1.31715726380775  |
| H | 7.70175409344281 | -0.11653195860029 | 1.11921390600845  |
| H | 6.25951902323899 | -1.48101701178098 | 4.71604258166056  |
| H | 7.01265375710928 | -2.53270961374717 | 3.47828129619091  |
| H | 5.44231275202907 | -4.26660010444891 | 2.91243305780692  |
| H | 3.05729996833820 | -4.96275737172484 | 2.48594480503337  |
| H | 1.24994908688315 | -3.24394944960372 | 2.72818020886170  |
| H | 8.72568890991883 | -0.34526496073841 | 3.40955445479722  |
| H | 7.55444973584142 | 0.22791063111590  | 4.63716585436253  |
| H | 9.97427281161351 | 1.77695758188541  | 3.21903759174294  |
| H | 9.97757193070565 | 4.12788292735549  | 2.29896046591907  |
| H | 7.80221478779478 | 5.09915201260958  | 1.52196308765173  |
| H | 1.88540462827424 | 0.17992635986808  | 4.02116161555123  |
| H | 0.64739142077959 | -1.08002565270614 | 3.75011954132163  |
| H | 1.28253139407377 | -0.15683170712180 | 2.37590326573370  |
| H | 4.86653040055227 | 3.24480799077089  | 0.88755964792139  |
| H | 5.58348890775570 | 4.87378359256446  | 0.99639454975881  |
| H | 4.70392525001695 | 4.19777962516969  | 2.38849561552210  |
| H | 7.64401714224958 | 3.49385735924422  | 7.07126678490884  |
| H | 7.87032131199728 | 3.91037694307275  | 5.34467496366197  |
| H | 7.01170252042547 | 2.40572557608458  | 5.80291408413766  |
| H | 5.10650123309659 | 6.25913361341888  | 6.35505481475464  |
| H | 6.76510332235420 | 6.15881812854819  | 5.67804815930730  |
| H | 6.47623654365663 | 5.77796994614781  | 7.40754436540636  |
| H | 5.22593824505069 | 3.60420966251952  | 8.08065483042641  |
| H | 4.63554042122513 | 2.53914627167697  | 6.77502168184585  |
| H | 3.88390150879473 | 4.14583077212578  | 7.03243257839971  |

**[Mn<sup>III</sup>(OO'Bu)(<sup>6</sup>Me dpaq)]<sup>+</sup> - singlet product complex (TPSSh)**

|    |                  |                   |                   |
|----|------------------|-------------------|-------------------|
| Mn | 5.06654509321845 | 0.89442630394061  | 3.06660071725540  |
| O  | 5.17142477276574 | 0.99555079000180  | 4.66503140064437  |
| O  | 5.32492587495750 | 4.17259432012569  | 4.78864629476333  |
| O  | 5.60436003570758 | -1.02520414812324 | -0.53195587930179 |
| N  | 3.41170969383173 | 1.93449095646048  | 2.64734856292942  |
| N  | 4.81773550343053 | 0.37607470527433  | 1.15455535009506  |
| N  | 6.64040447795024 | -0.49784828808334 | 2.91451068082502  |
| N  | 3.91154664353654 | -1.26175528238250 | 3.33176885679984  |
| N  | 6.66143749058268 | 2.14596025177591  | 2.61945542931778  |
| C  | 2.77024584105992 | 2.73616957664575  | 3.49225829858516  |
| C  | 1.54520999964538 | 3.34121217997714  | 3.15045405781382  |
| C  | 0.98617806679899 | 3.10310852324502  | 1.90793167897651  |
| C  | 1.64772287251016 | 2.24869226032153  | 0.98833855382567  |
| C  | 1.15588227299951 | 1.91129933181679  | -0.30188123053239 |
| C  | 1.88155603290392 | 1.04966963430827  | -1.10499080077073 |
| C  | 3.11401022531145 | 0.48733977733324  | -0.69120307216482 |
| C  | 3.63075103007639 | 0.79912746181490  | 0.56555661454873  |
| C  | 2.88290274210843 | 1.67867971603412  | 1.40607663894840  |
| C  | 5.68281367308434 | -0.50718252549687 | 0.57417193965245  |
| C  | 6.89805115513418 | -0.77656486175519 | 1.46698897922670  |
| C  | 6.26269065566642 | -1.72519009118814 | 3.65560977378034  |
| C  | 4.88351020167934 | -2.19597715748067 | 3.27633568018641  |
| C  | 4.62352018154316 | -3.52950417286704 | 2.97491694741851  |
| C  | 3.29827580468807 | -3.91450891968661 | 2.74936376478440  |
| C  | 2.29629099829656 | -2.95936776167979 | 2.87032958526463  |
| C  | 2.62880781638077 | -1.62593514581331 | 3.17019766339508  |
| C  | 7.77195611209287 | 0.20290005990624  | 3.56225386712231  |
| C  | 7.84316086395002 | 1.59778558862441  | 3.00716740251616  |
| C  | 9.05123544966449 | 2.27555532438849  | 2.89688089105209  |
| C  | 9.04981953857578 | 3.56904745798743  | 2.37420532603175  |
| C  | 7.84319087589264 | 4.10955780344137  | 1.94660528054771  |
| C  | 6.65038534791507 | 3.38074054621207  | 2.06305717006478  |
| C  | 1.55019207242370 | -0.59707254999005 | 3.34683688568171  |
| C  | 5.37281988668366 | 3.96236622935025  | 1.54957058726913  |
| C  | 5.84495859870223 | 4.15638806172582  | 6.07222273041557  |
| C  | 7.20299146873700 | 3.43663244390185  | 6.09812170855382  |



|   |                   |                   |                   |
|---|-------------------|-------------------|-------------------|
| C | 6.04187705938770  | 5.67812414476060  | 6.36390030389403  |
| C | 4.84563426397905  | 3.545327711479441 | 7.06622003742052  |
| H | 3.25190246153743  | 2.91072978336581  | 4.45288274927216  |
| H | 1.05748117101374  | 3.99215391396466  | 3.87668215620869  |
| H | 0.03644567920201  | 3.56273461828651  | 1.62570031416583  |
| H | 0.20871730787262  | 2.33391808807558  | -0.64146522966219 |
| H | 1.50012100632186  | 0.78875797618729  | -2.09430490105905 |
| H | 3.66539715184830  | -0.18699554259092 | -1.34278229718594 |
| H | 7.23670220571324  | -1.81264679343729 | 1.32682638430456  |
| H | 7.70368151296174  | -0.11141197441328 | 1.12331549650852  |
| H | 6.25567319758879  | -1.46090901724772 | 4.72304942914212  |
| H | 7.00932541325240  | -2.51786082077613 | 3.49003663777063  |
| H | 5.43949776359269  | -4.25205744409121 | 2.92724723492400  |
| H | 3.05451351041865  | -4.94945834500217 | 2.50242767838397  |
| H | 1.24719775889743  | -3.22999737434191 | 2.74079535994765  |
| H | 8.72401930190768  | -0.33229345693515 | 3.41508202324988  |
| H | 7.55188509714327  | 0.24721229126213  | 4.63891295595217  |
| H | 9.97443502263669  | 1.78832866056723  | 3.21280058096391  |
| H | 9.97868719282806  | 4.13468323857222  | 2.28117429482447  |
| H | 7.880298169443379 | 5.10473826662592  | 1.50342420405246  |
| H | 1.80101878068806  | 0.19456661669199  | 4.02833121335679  |
| H | 0.64370974411958  | -1.06538636559543 | 3.75425210125464  |
| H | 1.28103800382614  | -0.14109118144769 | 2.38186960661368  |
| H | 4.86372831628391  | 3.25470222396346  | 0.88264596530934  |
| H | 5.57980463837724  | 4.88397976081187  | 0.99218435668412  |
| H | 4.70462889775681  | 4.20382296592847  | 2.38590256088977  |
| H | 7.66172779170737  | 3.50354550641202  | 7.09628523701130  |
| H | 7.88594041764593  | 3.88335622286992  | 5.36101155115293  |
| H | 7.05177238903421  | 2.37553617346451  | 5.85214901045552  |
| H | 5.08152995711380  | 6.20824607662117  | 6.31011974255942  |
| H | 6.74572275726310  | 6.11958223569393  | 5.64541582939048  |
| H | 6.45170136464111  | 5.77210714347039  | 7.38103986489247  |
| H | 5.23872450259421  | 3.58540349078661  | 8.09365117675197  |
| H | 4.66297299108939  | 2.49269912060629  | 6.80319415368555  |
| H | 3.89235330481205  | 4.09368668202790  | 7.03474488138839  |

**[Mn<sup>III</sup>(OO<sup>t</sup>Bu)(<sup>6</sup>Me<sub>2</sub>dpaq)]<sup>+</sup> - quintet reactant (B3LYP)**

|    |                  |                   |                   |
|----|------------------|-------------------|-------------------|
| Mn | 4.95923693400343 | 1.08168915913440  | 2.97712268092399  |
| O  | 5.04927035176162 | 1.54088594946862  | 4.75619797133078  |
| O  | 5.24700741550111 | 2.97521910686549  | 4.84205928237914  |
| O  | 5.53601027259262 | -1.00653278959191 | -0.46787294188458 |
| N  | 3.24122743737976 | 2.10265808762567  | 2.50230916582731  |
| N  | 4.72951420228965 | 0.46166058278511  | 1.13285240213975  |
| N  | 6.65931511643398 | -0.26533183490065 | 2.92496583533902  |
| N  | 4.00543611652665 | -1.06086244100415 | 3.60482363743448  |
| N  | 6.76967392244016 | 2.41434950801725  | 2.41833214349466  |
| C  | 2.56522182148047 | 2.92803285376262  | 3.28479770721180  |
| C  | 1.36513328782224 | 3.53014304680371  | 2.85969913394849  |
| C  | 0.87826501776747 | 3.25085357606678  | 1.59584481208059  |
| C  | 1.58337512162860 | 2.36652803129708  | 0.73966350116101  |
| C  | 1.16499775607208 | 2.00469706782296  | -0.56848427059296 |
| C  | 1.93369721892784 | 1.12560862791196  | -1.30532028156644 |
| C  | 3.13451181253185 | 0.56551145460174  | -0.80193940549271 |
| C  | 3.57848676120272 | 0.89771553992559  | 0.47490399598119  |
| C  | 2.78998675889432 | 1.80477947945926  | 1.24535164421218  |
| C  | 5.60796090993138 | -0.44363694212690 | 0.61256943939000  |
| C  | 6.82965169291943 | -0.68347051871915 | 1.50329254353172  |
| C  | 6.37450536703387 | -1.41488753984954 | 3.80977508418772  |
| C  | 4.99400796531822 | -1.96984168153772 | 3.58057767530043  |
| C  | 4.75915762345051 | -3.33241744430565 | 3.42834924368204  |
| C  | 3.43512443918648 | -3.76727067253079 | 3.32258211543250  |
| C  | 2.41374710782111 | -2.82692165663405 | 3.39487859758934  |
| C  | 2.72780555188127 | -1.46515708597364 | 3.53780698637712  |
| C  | 7.82742488188136 | 0.48635151713935  | 3.42326461620205  |
| C  | 7.92756439081375 | 1.83941082903642  | 2.76795850724467  |
| C  | 9.15812854684558 | 2.46862348315761  | 2.58761574618761  |
| C  | 9.17179329445544 | 3.75028634870631  | 2.03759221413111  |
| C  | 7.96245301924393 | 4.34225884759340  | 1.67993601911815  |
| C  | 6.76338509362618 | 3.64543563007637  | 1.87715804744041  |

|   |                   |                   |                   |
|---|-------------------|-------------------|-------------------|
| C | 1.64174431152064  | -0.43293068027679 | 3.63277652108299  |
| C | 5.44107254556082  | 4.24495514449039  | 1.50522888747545  |
| C | 5.75806436740507  | 3.32764407129681  | 6.15588528246436  |
| C | 7.11036670576431  | 2.65692471174452  | 6.39611463602995  |
| C | 5.91054098017937  | 4.84405418974789  | 6.02917157002185  |
| C | 4.73830251342936  | 2.94788732692242  | 7.22834589667763  |
| H | 2.99765041453074  | 3.12085413180471  | 4.26745865644134  |
| H | 0.83789770676599  | 4.20695308639303  | 3.53355639407283  |
| H | -0.05181711025554 | 3.70529556070453  | 1.24493866561824  |
| H | 0.24231656969898  | 2.42524436203263  | -0.97331322370047 |
| H | 1.61498983730392  | 0.84404632964104  | -2.31158096282628 |
| H | 3.71632291569799  | -0.12672512378803 | -1.40556443594103 |
| H | 7.11115216776922  | -1.74427586271340 | 1.43793644103998  |
| H | 7.65033536376694  | -0.10332910500614 | 1.05753042461128  |
| H | 6.42587404726792  | -1.04761205938869 | 4.84553420332471  |
| H | 7.14073518151809  | -2.19757023496036 | 3.68551849898485  |
| H | 5.59212378220002  | -4.03701835597055 | 3.40097419162249  |
| H | 3.20676137681003  | -4.82802656093986 | 3.19777395943447  |
| H | 1.36758790265198  | -3.13340059131990 | 3.34370348679176  |
| H | 8.75829154700875  | -0.08727570631756 | 3.27675028490180  |
| H | 7.68790402694492  | 0.63260672425014  | 4.50353659478778  |
| H | 10.08214394030774 | 1.96217912614591  | 2.87251880947724  |
| H | 10.11547602455183 | 4.27775182196714  | 1.88165260884796  |
| H | 7.93767730140350  | 5.34016208830726  | 1.23957060073874  |
| H | 1.93177613187447  | 0.36961373670062  | 4.32189561190043  |
| H | 0.70447686635621  | -0.88588854910494 | 3.98337529411931  |
| H | 1.44445366687390  | 0.01689028047181  | 2.64749328740021  |
| H | 4.89524186147050  | 3.58550794062304  | 0.81526491558729  |
| H | 5.57016303738810  | 5.22276344468521  | 1.02415740267502  |
| H | 4.82214339160727  | 4.37426850066416  | 2.40469051789927  |
| H | 7.54541769210394  | 3.00832838671030  | 7.34366584183006  |
| H | 7.81135783350913  | 2.90256888349830  | 5.58364875479571  |
| H | 6.99765336996103  | 1.56531187973803  | 6.46131907238244  |
| H | 4.94257561942414  | 5.31698312496746  | 5.80512729219105  |
| H | 6.62015716484445  | 5.09818316659453  | 5.22712202961189  |
| H | 6.28766309735474  | 5.26353114428813  | 6.97372374501793  |
| H | 5.08960607188503  | 3.26544990238911  | 8.22197406770753  |
| H | 4.58028398178623  | 1.86046851607381  | 7.24725904781126  |
| H | 3.77220758409198  | 3.43835012684929  | 7.03266227734727  |

**[Mn<sup>III</sup>(OO'Bu)(<sup>6</sup>Me dpaq)]<sup>+</sup> - quintet reactant (TPSS)**

|    |                  |                   |                   |
|----|------------------|-------------------|-------------------|
| Mn | 5.01334267141312 | 1.09892956788575  | 2.95873734767984  |
| O  | 5.12214887785560 | 1.57755715650692  | 4.72935343631594  |
| O  | 5.38829459525237 | 3.02675640243169  | 4.81445411035007  |
| O  | 5.53992853920919 | -1.09183614385538 | -0.44705330041878 |
| N  | 3.28420600101587 | 2.07479693099360  | 2.50676323692723  |
| N  | 4.74818716162286 | 0.42226368742084  | 1.14185109393047  |
| N  | 6.69790948953778 | -0.24940215987054 | 2.90536935572103  |
| N  | 4.03735603586397 | -0.99676871661406 | 3.63510558809282  |
| N  | 6.80777991974558 | 2.38405964702443  | 2.38997375157277  |
| C  | 2.62734638968311 | 2.93868200648048  | 3.28142319893870  |
| C  | 1.40096599684626 | 3.50739367385752  | 2.87716058127452  |
| C  | 0.85702147031514 | 3.15839242313353  | 1.64765067431274  |
| C  | 1.53700330614473 | 2.23986693735484  | 0.80137007312727  |
| C  | 1.06961144915760 | 1.80724237897643  | -0.47187382908888 |
| C  | 1.82593263616506 | 0.90225109270406  | -1.20311817730181 |
| C  | 3.06144200439698 | 0.38757879431703  | -0.73058698174754 |
| C  | 3.55425943953981 | 0.79133440624317  | 0.51515578360293  |
| C  | 2.77882226921472 | 1.71719700388855  | 1.27978857376461  |
| C  | 5.64249095493028 | -0.47856025165361 | 0.61330162396309  |
| C  | 6.90833402060608 | -0.61292858559929 | 1.46711119295379  |
| C  | 6.39043445944745 | -1.44924721476544 | 3.73073855772778  |
| C  | 4.99064443973103 | -1.93958984256667 | 3.45971038117496  |
| C  | 4.69620775103697 | -3.25921807727445 | 3.11878596203708  |
| C  | 3.34827836362830 | -3.62050939256207 | 2.97280550987849  |
| C  | 2.36486282514025 | -2.66091876271413 | 3.21179066210993  |
| C  | 2.73636476202222 | -1.34457800971412 | 3.55287641000754  |
| C  | 7.85415387800868 | 0.49192275740851  | 3.47081996474009  |
| C  | 7.96619824738721 | 1.85102648489951  | 2.82370320946567  |

|   |                   |                   |                   |
|---|-------------------|-------------------|-------------------|
| C | 9.18794344212588  | 2.52162366729702  | 2.71124333044609  |
| C | 9.19372793502455  | 3.79819201062466  | 2.13808489399062  |
| C | 7.98860209641054  | 4.34240758702420  | 1.68420861382008  |
| C | 6.79793281006565  | 3.60895031268134  | 1.81656251714318  |
| C | 1.69798664358732  | -0.30196452898554 | 3.87056989463091  |
| C | 5.47847817323925  | 4.14712635106504  | 1.34170830915219  |
| C | 5.76657085005779  | 3.36187349233045  | 6.19039238406409  |
| C | 7.05794843198108  | 2.62819657998088  | 6.56783124398810  |
| C | 5.99335072995440  | 4.87428982923542  | 6.06901507148338  |
| C | 4.61499925502369  | 3.02642684758437  | 7.14307202635416  |
| H | 3.10125797736970  | 3.17626543658046  | 4.23730790424703  |
| H | 0.89399536342179  | 4.21284699832005  | 3.54070800659449  |
| H | -0.09647695372164 | 3.58482886218911  | 1.31911652284681  |
| H | 0.12161127684199  | 2.19370896465686  | -0.85753533923291 |
| H | 1.46758671453615  | 0.56791537259243  | -2.18186202075340 |
| H | 3.63498322243376  | -0.32077295343458 | -1.32827121374605 |
| H | 7.30812250058576  | -1.63580306505512 | 1.37589913858571  |
| H | 7.65327404101056  | 0.07927789630691  | 1.04157385442661  |
| H | 6.45089032887074  | -1.13572109893647 | 4.78568362407173  |
| H | 7.13841472972384  | -2.24205932011307 | 3.55264357669084  |
| H | 5.49899194345509  | -3.98827471631076 | 2.97699506376761  |
| H | 3.07372449075694  | -4.64240084866815 | 2.69423705817000  |
| H | 1.30392137535849  | -2.91936429980751 | 3.14589543775959  |
| H | 8.79274058141734  | -0.08031723414583 | 3.35262759795836  |
| H | 7.65672643135675  | 0.62131638432117  | 4.54787711684963  |
| H | 10.11049145477378 | 2.05056789099287  | 3.06266761630598  |
| H | 10.12913158238986 | 4.35653791001915  | 2.03452916071084  |
| H | 7.96178840425229  | 5.33098365406287  | 1.21760513643735  |
| H | 2.13093678427302  | 0.48204409415603  | 4.50731038149229  |
| H | 0.84140064931819  | -0.76066916016624 | 4.39013670648457  |
| H | 1.31087747133346  | 0.16677973477962  | 2.94865399343281  |
| H | 4.97260628371652  | 3.41411267847441  | 0.69210567889210  |
| H | 5.61177998253630  | 5.08531535747504  | 0.78356233061134  |
| H | 4.81911269033956  | 4.34109787493471  | 2.20423318676069  |
| H | 7.40108736533118  | 2.94714904013882  | 7.56642244747661  |
| H | 7.85470989849583  | 2.85332939334887  | 5.83826067034569  |
| H | 6.88724573944441  | 1.53951653564088  | 6.59696607873653  |
| H | 5.07021686033325  | 5.38213334769432  | 5.74353489634144  |
| H | 6.79356622794357  | 5.09000008420549  | 5.34148964881299  |
| H | 6.28881305146434  | 5.28396114640872  | 7.04931021731288  |
| H | 4.87613864192929  | 3.31479850214530  | 8.17541236021018  |
| H | 4.40440815429746  | 1.94514537242855  | 7.12421088380536  |
| H | 3.70062541202097  | 3.57202682158969  | 6.85289700140843  |

### [Mn<sup>III</sup>(OO<sup>t</sup>Bu)(<sup>6</sup>Me<sub>3</sub>dpaq)]<sup>+</sup> - triplet reactant (B3LYP)

|    |                  |                   |                   |
|----|------------------|-------------------|-------------------|
| Mn | 5.11240257371421 | 1.00776762748873  | 2.85834983535596  |
| O  | 5.25467046838912 | 1.44260073991595  | 4.64347849482882  |
| O  | 5.58775851105616 | 2.83600697417104  | 4.85815547530881  |
| O  | 5.68694540633339 | -1.08125323514901 | -0.56498448039170 |
| N  | 3.45809944729425 | 2.05992943939424  | 2.42071568283517  |
| N  | 4.83658517301887 | 0.36638242511082  | 1.03751959968290  |
| N  | 6.75989259233546 | -0.21389702209042 | 2.80298211064494  |
| N  | 4.12020391292656 | -0.79702879631212 | 3.50682746189750  |
| N  | 6.60109997203847 | 2.39933734731353  | 2.28356902209283  |
| C  | 2.86827853253451 | 2.96953800727109  | 3.17612841698972  |
| C  | 1.65949330392525 | 3.58464877276477  | 2.78887993163070  |
| C  | 1.06868004681406 | 3.23073435482804  | 1.59080185162509  |
| C  | 1.68838592652081 | 2.26366659197883  | 0.75588124109579  |
| C  | 1.18133529965477 | 1.83115381292326  | -0.49923854906150 |
| C  | 1.88710349892325 | 0.89776889807390  | -1.23408071180069 |
| C  | 3.11572841272732 | 0.35292688625477  | -0.78378206609193 |
| C  | 3.64077097029327 | 0.74993206010552  | 0.44181944328446  |
| C  | 2.91058674155308 | 1.70157437061231  | 1.21896621956327  |
| C  | 5.74699691947166 | -0.48602182653311 | 0.49980108185618  |
| C  | 7.00082806451999 | -0.59285727568768 | 1.37663207350951  |
| C  | 6.45902035533731 | -1.38998222448283 | 3.63896198637299  |
| C  | 5.02297980430828 | -1.80652092038264 | 3.48982263433100  |
| C  | 4.65597391595092 | -3.14482417632187 | 3.45879016952296  |
| C  | 3.29680731741281 | -3.46445725374023 | 3.49224343832958  |

|   |                  |                   |                   |
|---|------------------|-------------------|-------------------|
| C | 2.37907103493959 | -2.43087888270627 | 3.61712696178746  |
| C | 2.81220582022562 | -1.09462569466996 | 3.63856678416641  |
| C | 7.84234694577712 | 0.61290203875439  | 3.37044630711928  |
| C | 7.80063466461295 | 1.98066434233627  | 2.74914028811742  |
| C | 8.95269034225820 | 2.75544293998397  | 2.67263105511317  |
| C | 8.87061986420046 | 4.01967049880721  | 2.09354845515178  |
| C | 7.64951824357908 | 4.42640532014128  | 1.56960434532695  |
| C | 6.52435330471318 | 3.59456954546215  | 1.65603761032239  |
| C | 1.81119107722047 | -0.00383982999986 | 3.87646756151712  |
| C | 5.24581251443015 | 4.03394620905004  | 1.01076327038340  |
| C | 5.76472925708603 | 3.07041897532936  | 6.28017257189500  |
| C | 6.94178247921399 | 2.24435831481668  | 6.80156787712773  |
| C | 6.07959326682483 | 4.56647327292058  | 6.31692125707349  |
| C | 4.47300501388880 | 2.75207587760949  | 7.03348555690462  |
| H | 3.37315824593305 | 3.21731552080950  | 4.11074325400169  |
| H | 1.20700606749532 | 4.33050224891762  | 3.44418637299289  |
| H | 0.12948632774116 | 3.69044214673529  | 1.27315193175305  |
| H | 0.24221020217718 | 2.24683422730072  | -0.87009549672265 |
| H | 1.49703294755089 | 0.56726888553431  | -2.19958269693156 |
| H | 3.65946050878543 | -0.36975132293783 | -1.38872043216434 |
| H | 7.41625882123743 | -1.60816773258104 | 1.30721245297440  |
| H | 7.74260853908774 | 0.09640815120737  | 0.94911756383919  |
| H | 6.60453317390262 | -1.09408817833211 | 4.68831813452667  |
| H | 7.14468179960307 | -2.22389875656429 | 3.42217665377446  |
| H | 5.42206352803855 | -3.92069763325256 | 3.42047065763402  |
| H | 2.96599667555467 | -4.50453495127264 | 3.45352715605745  |
| H | 1.31215955267209 | -2.64000149922570 | 3.70858908551644  |
| H | 8.83132525824031 | 0.14618076111057  | 3.22618862164940  |
| H | 7.65522038065037 | 0.70590195168517  | 4.44863300673706  |
| H | 9.89639802685765 | 2.36427404390329  | 3.05646548471988  |
| H | 9.75036422931330 | 4.66322637959675  | 2.02490962290671  |
| H | 7.55288338788151 | 5.39038749962641  | 1.06858209861208  |
| H | 2.24897402352415 | 0.79132692230771  | 4.48894588503426  |
| H | 0.93619163089400 | -0.41382552794606 | 4.39851364056039  |
| H | 1.45556343416539 | 0.43619417139983  | 2.93439824428528  |
| H | 4.81752235590097 | 3.22966230963346  | 0.40104578919718  |
| H | 5.43044278954991 | 4.90048828806202  | 0.36347861355359  |
| H | 4.49852070174605 | 4.32492750135194  | 1.76023199621122  |
| H | 7.14125035517582 | 2.48094560529172  | 7.85758957644951  |
| H | 7.85222899796009 | 2.46797520678556  | 6.22345879061942  |
| H | 6.72462018287236 | 1.16889767566800  | 6.73048175144883  |
| H | 5.24424726067167 | 5.15122859004960  | 5.90312474633119  |
| H | 6.98532237245528 | 4.79045849672378  | 5.73338801702880  |
| H | 6.24616011265313 | 4.88979819020633  | 7.35525866728649  |
| H | 4.58691045013137 | 2.98166259249815  | 8.10387256344860  |
| H | 4.21430118652985 | 1.68887538992618  | 6.93193156298985  |
| H | 3.63848447702221 | 3.35616734043839  | 6.64374741825921  |

**[Mn<sup>III</sup>(OO<sup>t</sup>Bu)(<sup>6</sup>Me dpaq)]<sup>+</sup> - triplet reactant (TPSS)**

|    |                  |                   |                   |
|----|------------------|-------------------|-------------------|
| Mn | 5.14571450356200 | 1.01979119115509  | 2.84015811917486  |
| O  | 5.30073061620971 | 1.44984964306487  | 4.62124790467575  |
| O  | 5.69961081664671 | 2.84495994734267  | 4.86847196707153  |
| O  | 5.69029362491634 | -1.13088240385909 | -0.55869332974811 |
| N  | 3.51515749971643 | 2.04313909305328  | 2.42579095377570  |
| N  | 4.85574107620031 | 0.35533342135270  | 1.03993405947901  |
| N  | 6.78656259356300 | -0.19017474429844 | 2.78153921630532  |
| N  | 4.15351122387261 | -0.74459699028200 | 3.48985519502241  |
| N  | 6.59617979913420 | 2.39007637383332  | 2.26853900407241  |
| C  | 2.93670217540706 | 2.98645704935508  | 3.17564885541236  |
| C  | 1.71430145901697 | 3.58732061999632  | 2.80452660724174  |
| C  | 1.07726938296631 | 3.20196285546875  | 1.63241050070075  |
| C  | 1.67787981570048 | 2.21237865016878  | 0.80195972469852  |
| C  | 1.13964261213707 | 1.74154347261065  | -0.43056814163233 |
| C  | 1.83217534012404 | 0.78958354845443  | -1.16760891017639 |
| C  | 3.07972751335951 | 0.26316373746470  | -0.74309977121457 |
| C  | 3.63385118231950 | 0.70033660187887  | 0.46359956776769  |
| C  | 2.91936307569827 | 1.66291370346269  | 1.24110857394041  |
| C  | 5.77502102440074 | -0.50052912860939 | 0.49398206305366  |
| C  | 7.05264813307075 | -0.53780969214682 | 1.34430392745682  |

|   |                  |                   |                   |
|---|------------------|-------------------|-------------------|
| C | 6.48029893146634 | -1.39533470790277 | 3.58925190309908  |
| C | 5.03549766522633 | -1.78273922810440 | 3.42664796399608  |
| C | 4.63374493767686 | -3.11340906248830 | 3.34504924851855  |
| C | 3.26303745613457 | -3.40252971045728 | 3.37612465160304  |
| C | 2.37046235143024 | -2.35027407032733 | 3.56434848000292  |
| C | 2.83361168743086 | -1.02136571837437 | 3.63904984781917  |
| C | 7.86015388670793 | 0.63945662117993  | 3.38831191629257  |
| C | 7.80659850129949 | 2.00758353564053  | 2.76559669807075  |
| C | 8.94219003353866 | 2.81490723060788  | 2.70136878694125  |
| C | 8.83958166636803 | 4.07224426241947  | 2.10033760270553  |
| C | 7.61827897774944 | 4.43501191688832  | 1.53325415585451  |
| C | 6.50812746806284 | 3.57550666310747  | 1.60462219680951  |
| C | 1.86465526663272 | 0.08032841640414  | 3.96341609189100  |
| C | 5.23739735072593 | 3.96129751110523  | 0.90593686986456  |
| C | 5.76337949522888 | 3.05761873974664  | 6.31789537757482  |
| C | 6.83849782405508 | 2.14981851493322  | 6.92594152655461  |
| C | 6.16712059290027 | 4.53581460282460  | 6.38380553067641  |
| C | 4.38709125515664 | 2.81390273633931  | 6.94673917036422  |
| H | 3.46946792796126 | 3.25913922933693  | 4.08934417059726  |
| H | 1.28204631086306 | 4.35200985736218  | 3.45580913682791  |
| H | 0.12532390594841 | 3.65273392250421  | 1.33498111529654  |
| H | 0.18606929747833 | 2.14295755043499  | -0.78649315657216 |
| H | 1.41345089426121 | 0.43378965891773  | -2.11431344159821 |
| H | 3.61548300123235 | -0.47073912659495 | -1.34614544699147 |
| H | 7.53990485794338 | -1.52268959400343 | 1.26494769892546  |
| H | 7.74062144830630 | 0.21811261762390  | 0.93182404348166  |
| H | 6.63357407878109 | -1.12364202931945 | 4.64701653450382  |
| H | 7.15855663565514 | -2.22960337232590 | 3.34117094602336  |
| H | 5.38271832574145 | -3.90612138430780 | 3.26920672711266  |
| H | 2.90571402147396 | -4.43316797308183 | 3.29274343159269  |
| H | 1.29795758189415 | -2.53758874954405 | 3.66657733674563  |
| H | 8.85853354188849 | 0.18233019111518  | 3.25937202353192  |
| H | 7.63607133724157 | 0.71435240551035  | 4.46426775151497  |
| H | 9.88884661354314 | 2.45252880866448  | 3.11149166567402  |
| H | 9.70392808423057 | 4.74058446083305  | 2.04396046673621  |
| H | 7.50752625031009 | 5.38737719656995  | 1.00805402001856  |
| H | 2.35869886472345 | 0.86306101387217  | 4.55375716674675  |
| H | 1.02613122323502 | -0.33526484099045 | 4.54364927157516  |
| H | 1.44144994640223 | 0.53819213602287  | 3.05400818785576  |
| H | 4.82970513253459 | 3.11122279004875  | 0.34034639161331  |
| H | 5.43562642461048 | 4.78915691664493  | 0.20937751195413  |
| H | 4.46908870377567 | 4.29368512649041  | 1.62155588323908  |
| H | 6.94946519070662 | 2.35439648883757  | 8.00417324102692  |
| H | 7.81269773023634 | 2.32914336724628  | 6.43923879112467  |
| H | 6.56161327941431 | 1.08977345482325  | 6.80408186868631  |
| H | 5.40971434762358 | 5.16809422230891  | 5.89135623855619  |
| H | 7.13953341099334 | 4.69847000166922  | 5.88994262409895  |
| H | 6.25195524734580 | 4.84932995340708  | 7.43773111862261  |
| H | 4.42648387383359 | 2.99610079783864  | 8.03395617130040  |
| H | 4.06819202028662 | 1.77292021326745  | 6.77759300480103  |
| H | 3.63381067371018 | 3.49379248580825  | 6.51267439966100  |

**[Mn<sup>III</sup>(OO<sup>t</sup>Bu)(<sup>6</sup>Me dpaq)]<sup>+</sup> - singlet reactant (B3LYP)**

|    |                  |                   |                   |
|----|------------------|-------------------|-------------------|
| Mn | 5.11659975889776 | 1.00433685863316  | 2.87080477054314  |
| O  | 5.29099983398069 | 1.45190672346260  | 4.62539344471237  |
| O  | 5.54972355978564 | 2.85243482656480  | 4.85883074924620  |
| O  | 5.64541348161964 | -1.15625484673130 | -0.51746079384760 |
| N  | 3.47263417275832 | 2.06949310445420  | 2.41483120223020  |
| N  | 4.82837501112372 | 0.34188295523450  | 1.05809560488976  |
| N  | 6.75790098080974 | -0.22507781100233 | 2.81807512784093  |
| N  | 4.12635736053001 | -0.79733063343216 | 3.52919253966456  |
| N  | 6.60733190156334 | 2.39366500460783  | 2.26985669068921  |
| C  | 2.88669645607813 | 2.98867310736636  | 3.16206307736905  |
| C  | 1.68905579451011 | 3.61841617726438  | 2.76337853549712  |
| C  | 1.10456338363620 | 3.26998460807977  | 1.56086745032708  |
| C  | 1.71851474398247 | 2.29185981620831  | 0.73487051238080  |
| C  | 1.21602610930420 | 1.86218043674158  | -0.52296983139232 |
| C  | 1.91293866565617 | 0.91374298199548  | -1.24700954035659 |
| C  | 3.12731934715663 | 0.34987068354343  | -0.78232261052206 |

|   |                  |                   |                   |
|---|------------------|-------------------|-------------------|
| C | 3.64828039332591 | 0.74455782031109  | 0.44620072107525  |
| C | 2.92798254755555 | 1.71337671394750  | 1.211371347038840 |
| C | 5.72112644758433 | -0.53770198608458 | 0.53320971464494  |
| C | 6.98343109927730 | -0.63402455439092 | 1.39810877163946  |
| C | 6.46384666422944 | -1.38479857371025 | 3.67840633472555  |
| C | 5.02882926705664 | -1.80645786292708 | 3.53930359473767  |
| C | 4.66414418461180 | -3.14587367771857 | 3.53738849975035  |
| C | 3.30557301668837 | -3.46710395533373 | 3.57117930377055  |
| C | 2.38604366596426 | -2.43165833521062 | 3.66368449656090  |
| C | 2.81762075787322 | -1.09471039942105 | 3.65552768972591  |
| C | 7.85210828880829 | 0.60494490005873  | 3.35712676211956  |
| C | 7.80945613605926 | 1.96748443348379  | 2.72261294328833  |
| C | 8.96860879535744 | 2.72997682281575  | 2.62555646492289  |
| C | 8.89289800594875 | 3.99046745311947  | 2.03796858417015  |
| C | 7.66905503117211 | 4.40536481422082  | 1.52711435923351  |
| C | 6.53668436474689 | 3.58550509732082  | 1.63418501807768  |
| C | 1.81065580910515 | -0.00063087233414 | 3.84983538599262  |
| C | 5.25658023801247 | 4.03580315334876  | 0.99950873344749  |
| C | 5.72369715032417 | 3.08049924783060  | 6.2842908887444   |
| C | 6.93819680238308 | 2.30063862811263  | 6.78981113688258  |
| C | 5.97365344124009 | 4.58806730170257  | 6.33326914064668  |
| C | 4.44962067892447 | 2.69748239033991  | 7.03707752107388  |
| H | 3.38691135818196 | 3.23599741538059  | 4.09906645809116  |
| H | 1.24108925133620 | 4.37184953663986  | 3.41308981694366  |
| H | 0.17472439111064 | 3.74159048337738  | 1.23330309453538  |
| H | 0.28679483143673 | 2.29076601668142  | -0.90390145324747 |
| H | 1.52590367903611 | 0.58501205379423  | -2.21433557132602 |
| H | 3.66246419242136 | -0.38705540603689 | -1.37750749859267 |
| H | 7.39678932038131 | -1.65107536558795 | 1.34409328233446  |
| H | 7.72097250409633 | 0.04598446139022  | 0.94863988139806  |
| H | 6.61216151149712 | -1.06888647399450 | 4.72163068375498  |
| H | 7.15115453662874 | -2.22101950893414 | 3.47581768242253  |
| H | 5.43199334194569 | -3.92077126114610 | 3.52022272069548  |
| H | 2.97618480764422 | -4.50819596289258 | 3.55545192880137  |
| H | 1.31859789290375 | -2.63977667146716 | 3.75059937593240  |
| H | 8.83643514240677 | 0.13188002479380  | 3.20203295914803  |
| H | 7.68512586516772 | 0.71045153787639  | 4.43760496030967  |
| H | 9.91294392485083 | 2.33144109505470  | 3.00021639501667  |
| H | 9.77823244372626 | 4.62427692726387  | 1.95282577770169  |
| H | 7.57550505941744 | 5.36659051857073  | 1.02025543654014  |
| H | 2.23116169134524 | 0.80579894630185  | 4.45972979107641  |
| H | 0.92175476377652 | -0.40119972506826 | 4.35522127562893  |
| H | 1.48147976636409 | 0.42384847333081  | 2.89114260881640  |
| H | 4.81898376804810 | 3.23683820225013  | 0.38930882572435  |
| H | 5.44257690119127 | 4.90325453441269  | 0.35385842870322  |
| H | 4.51576386636741 | 4.32899813107940  | 1.75426091977164  |
| H | 7.13915482937282 | 2.54373646118535  | 7.84402579059280  |
| H | 7.83225291720531 | 2.56125601558101  | 6.20187421782286  |
| H | 6.76455907137927 | 1.21717949480442  | 6.71972799719341  |
| H | 5.11162885712358 | 5.14009764941837  | 5.92932712657271  |
| H | 6.86553494957530 | 4.85572184514584  | 5.74691609704210  |
| H | 6.13190944129142 | 4.90891720679956  | 7.37361713911915  |
| H | 4.55732514566796 | 2.91715891980641  | 8.11012622577598  |
| H | 4.23665685737815 | 1.62535302596891  | 6.92254915110175  |
| H | 3.58849877207616 | 3.27008184574577  | 6.65803513292387  |

**[Mn<sup>III</sup>(OO<sup>t</sup>Bu)(<sup>6</sup>Me<sup>+</sup>dpaq)]<sup>+</sup> - singlet reactant (TPSS)**

|    |                  |                   |                   |
|----|------------------|-------------------|-------------------|
| Mn | 5.14452589550919 | 1.04453983531001  | 2.86266955650608  |
| O  | 5.27049761152005 | 1.50596848536661  | 4.59405709111003  |
| O  | 5.76533763033445 | 2.85542233915008  | 4.90801232254290  |
| O  | 5.69061746966797 | -1.18126965631090 | -0.51895625942536 |
| N  | 3.51756990471801 | 2.05279375228731  | 2.39110794121613  |
| N  | 4.84948526549526 | 0.32606644661226  | 1.05876613662646  |
| N  | 6.78734326120500 | -0.15564274571336 | 2.79375864881450  |
| N  | 4.16599716170172 | -0.71393437858182 | 3.51800744481025  |
| N  | 6.57846274272982 | 2.42001216779576  | 2.24613162357352  |
| C  | 2.93990041657022 | 3.01318964339092  | 3.11976458505498  |
| C  | 1.71879679863948 | 3.60788496965604  | 2.73423145252541  |
| C  | 1.08585217228564 | 3.20056028946615  | 1.56748069098954  |

|   |                  |                   |                   |
|---|------------------|-------------------|-------------------|
| C | 1.68568253075196 | 2.19272350192574  | 0.75931222695516  |
| C | 1.15141707897833 | 1.69881571125016  | -0.46492980837994 |
| C | 1.84476443085495 | 0.72759569750764  | -1.17726767402487 |
| C | 3.08613167358086 | 0.20320254844051  | -0.73516703089203 |
| C | 3.63777832844235 | 0.66283001668765  | 0.46594120460222  |
| C | 2.92342623004754 | 1.64665545934816  | 1.21617763424587  |
| C | 5.77004460005343 | -0.53109088825856 | 0.52361573744558  |
| C | 7.05375306582622 | -0.53296530084764 | 1.36447291134436  |
| C | 6.49333419697801 | -1.34926578590328 | 3.62585178910702  |
| C | 5.05184028934092 | -1.74983049451599 | 3.47398158011569  |
| C | 4.65844612835977 | -3.08405159713475 | 3.41511679746606  |
| C | 3.28950200363050 | -3.38086345550642 | 3.44981673145022  |
| C | 2.39133984394257 | -2.32953345235371 | 3.61541746403247  |
| C | 2.84681356170620 | -0.99679933354858 | 3.66594386889669  |
| C | 7.86080128231521 | 0.69122908317555  | 3.37988283622711  |
| C | 7.79745365393804 | 2.04788180280365  | 2.73208031167730  |
| C | 8.93468308074964 | 2.84921695418878  | 2.63434043175043  |
| C | 8.82811738093319 | 4.09339655050275  | 2.00694539188323  |
| C | 7.60018897787724 | 4.44413912745415  | 1.44713516711443  |
| C | 6.48872791064845 | 3.58902255359771  | 1.55208673415514  |
| C | 1.86663825953140 | 0.10489620397219  | 3.95713433040274  |
| C | 5.21439395813849 | 3.96435795755604  | 0.85365595052907  |
| C | 5.76735417946202 | 3.02816510047160  | 6.36768209694041  |
| C | 6.72508897920805 | 2.01504250632349  | 7.00419326432153  |
| C | 6.28938445209368 | 4.46421091050072  | 6.49832050121656  |
| C | 4.34053417148615 | 2.88733603524750  | 6.90943588658646  |
| H | 3.46715150062139 | 3.30637169895579  | 4.02986524083797  |
| H | 1.28624529702662 | 4.38628942992615  | 3.36880390947971  |
| H | 0.13649414374123 | 3.64845770223750  | 1.25749698975415  |
| H | 0.20111479005964 | 2.09575804575297  | -0.83421677518423 |
| H | 1.42919777268571 | 0.35344614461394  | -2.11836025073100 |
| H | 3.62030614034271 | -0.54725057437050 | -1.31891358782073 |
| H | 7.55590061045808 | -1.51185137976506 | 1.30833750589609  |
| H | 7.72769632186597 | 0.22412261919349  | 0.93169726058330  |
| H | 6.65009298854942 | -1.05771537840664 | 4.67791426152709  |
| H | 7.17830663500937 | -2.18115118594334 | 3.38891359183251  |
| H | 5.41234380082740 | -3.87333702555988 | 3.35310833687092  |
| H | 2.93796781542458 | -4.41478006492752 | 3.38509709345811  |
| H | 1.31934653066129 | -2.52046627065574 | 3.71663749635665  |
| H | 8.85994573307193 | 0.23606600119197  | 3.25095812394311  |
| H | 7.64822113687635 | 0.78007106303915  | 4.45724235061610  |
| H | 9.88592511567915 | 2.49197988484481  | 3.03850722355891  |
| H | 9.69311211070026 | 4.75800912986469  | 1.92360054795188  |
| H | 7.48451447657157 | 5.38350561334830  | 0.89995736836522  |
| H | 2.34656466277390 | 0.90535333924603  | 4.53533329354227  |
| H | 1.02492924594434 | -0.30356998541647 | 4.53779874275819  |
| H | 1.44967523298618 | 0.53977261526840  | 3.03359831436021  |
| H | 4.80486048482460 | 3.10699514104833  | 0.30036618781556  |
| H | 5.41005762185243 | 4.78227064168944  | 0.14468224272077  |
| H | 4.44738939358759 | 4.30694462599729  | 1.56587451426931  |
| H | 6.78567688133091 | 2.17856981752477  | 8.09329621414591  |
| H | 7.73935516728725 | 2.12519232330969  | 6.58335214966695  |
| H | 6.36973638489547 | 0.98605773450669  | 6.83044680557437  |
| H | 5.61718758243785 | 5.17094636474520  | 5.98418813285394  |
| H | 7.29863194942076 | 4.55547378560675  | 6.06373215639403  |
| H | 6.34013191614662 | 4.74271631273945  | 7.56425249151708  |
| H | 4.32892363071079 | 3.05198296701864  | 8.00003343839461  |
| H | 3.95022538437150 | 1.87730094839235  | 6.70506915188998  |
| H | 3.67251396199869 | 3.63165235366746  | 6.44318290728340  |

**[Mn<sup>III</sup>(OO<sup>t</sup>Bu)(N4S)]<sup>+</sup> - singlet reactant (TPSSh)**

|   |                  |                  |                  |
|---|------------------|------------------|------------------|
| C | 5.92681884798740 | 1.34698796855415 | 4.04494918068615 |
| H | 5.57558580708704 | 0.88834644241733 | 3.10737943452221 |
| H | 5.06621170048374 | 1.40976065499556 | 4.72611311871749 |
| H | 6.67397142364242 | 0.68516968102810 | 4.50211710012734 |
| C | 5.44461420073782 | 3.57084936617735 | 2.98016089254071 |
| H | 5.81727700352549 | 4.57868558309706 | 2.75572535227129 |
| H | 4.50119159551609 | 3.65457457763658 | 3.53764499391116 |

|    |                   |                  |                   |
|----|-------------------|------------------|-------------------|
| H  | 5.23782113954922  | 3.05570533048608 | 2.02750998325423  |
| C  | 6.47174753572721  | 2.77174337693827 | 3.81893781677235  |
| C  | 7.77088508546083  | 2.81426687519716 | 3.04846231796139  |
| C  | 7.88885908322788  | 1.91879175632993 | 1.84141278472793  |
| H  | 8.05085298828827  | 2.50616834172389 | 0.92380341353627  |
| H  | 6.98747090718259  | 1.31363960503797 | 1.70374278552117  |
| H  | 8.74765016909216  | 1.23574316895520 | 1.94322310824157  |
| C  | 9.91933586849755  | 3.64021272068893 | 2.55962140146131  |
| H  | 9.64050796935697  | 3.50441866937290 | 1.50586938343894  |
| H  | 10.52464344900751 | 2.76122850444133 | 2.84519269715678  |
| C  | 10.77999048463663 | 4.88987384518314 | 2.65228929265051  |
| H  | 11.58765062381518 | 4.76963690568178 | 1.91342346953255  |
| H  | 10.20803350536007 | 5.77541422450382 | 2.33584123843612  |
| C  | 11.42596800530398 | 5.11149448213295 | 4.00894278285574  |
| H  | 11.78389673829428 | 4.15254429756864 | 4.40962182787232  |
| H  | 12.30041219549052 | 5.77972846523917 | 3.91903585247385  |
| C  | 10.23126863583597 | 7.12152117043229 | 4.70302765136267  |
| H  | 11.11278640448313 | 7.60026134221138 | 4.24737523689060  |
| H  | 10.03018324552064 | 7.62817142811136 | 5.65823140535503  |
| C  | 9.00260018607884  | 7.31570398131089 | 3.86205249264094  |
| C  | 8.94671494266668  | 8.29492773029732 | 2.87606573129159  |
| H  | 9.85167098378405  | 8.83296674201533 | 2.59020367016428  |
| C  | 7.71181972790629  | 8.57531794867857 | 2.28473665830722  |
| H  | 7.62838468301428  | 9.31237678130035 | 1.48387455120805  |
| C  | 6.58469211010068  | 7.94232195359712 | 2.79218491867057  |
| H  | 5.58842399538059  | 8.20083484629844 | 2.43043425370799  |
| C  | 6.70221393243976  | 6.98502284982129 | 3.81694523868703  |
| C  | 5.46911249073742  | 6.53669754367636 | 4.53797162946185  |
| H  | 5.58869850307993  | 5.54888523420794 | 4.99790352683497  |
| H  | 4.59142356576514  | 6.55564236591992 | 3.87825159985295  |
| H  | 5.28997048013030  | 7.25966041636640 | 5.35239325019732  |
| C  | 11.08386559463687 | 5.56537430190424 | 6.36546890478939  |
| H  | 10.47505016974447 | 6.17311908938359 | 7.04866335982184  |
| H  | 12.12444062413954 | 5.93206333380453 | 6.38295990934852  |
| C  | 11.01606916882305 | 4.13206238095186 | 6.80296699388843  |
| C  | 11.91683986342309 | 3.63873037154116 | 7.74350722148192  |
| H  | 12.68719326575525 | 4.29410460441717 | 8.15252873677109  |
| C  | 11.80722589615784 | 2.30827178418937 | 8.14026080166621  |
| H  | 12.48411309309373 | 1.88737188164778 | 8.88610173340157  |
| C  | 10.83388244995671 | 1.51970568921742 | 7.53563919138547  |
| H  | 10.73643646872509 | 0.46286413109753 | 7.78649050368791  |
| C  | 9.97000382563369  | 2.06754374385193 | 6.57706582414442  |
| C  | 8.97270733533287  | 1.18610931728148 | 5.89885464172632  |
| H  | 7.95281544089950  | 1.49064481933845 | 6.17775524742537  |
| H  | 9.13871538503503  | 0.13619522258919 | 6.17159413995225  |
| H  | 9.05300959000017  | 1.28660270288134 | 4.80729236753307  |
| C  | 7.52854806212379  | 5.43318412457206 | 8.95817280930105  |
| C  | 6.08103382793697  | 5.58191805905155 | 8.49162652086401  |
| H  | 6.02269695566596  | 6.27133869592938 | 7.63828234501514  |
| H  | 5.45806719745228  | 5.98009568272508 | 9.30694030896057  |
| H  | 5.67661059869215  | 4.60788871743055 | 8.17998731072434  |
| C  | 8.14828401089278  | 6.77822695998259 | 9.34079289486331  |
| H  | 9.19224092836606  | 6.64310796855548 | 9.66472614333470  |
| H  | 7.58674737523497  | 7.23821069695343 | 10.16834805028864 |
| H  | 8.12672025747897  | 7.46810700811229 | 8.48453887104717  |
| C  | 7.65206142826155  | 4.41241878767853 | 10.09033179869924 |
| H  | 7.23027064983673  | 3.44413775229400 | 9.78357602480436  |
| H  | 7.10469291967092  | 4.76860973807031 | 10.97560747979571 |
| H  | 8.70684135555146  | 4.26633064146739 | 10.36690048639419 |
| N  | 10.49780424150422 | 5.69954194482943 | 5.01019627126031  |
| N  | 8.70576758903225  | 3.63946936661500 | 3.40027294129540  |
| N  | 7.92467258618926  | 6.59263339145930 | 4.25069873279929  |
| N  | 10.04214860694525 | 3.37864065475444 | 6.24483206332536  |
| O  | 8.31283203030161  | 5.65021896583787 | 6.73576759253095  |
| O  | 8.32740052262095  | 4.80667385808806 | 7.91620331397243  |
| S  | 6.69969877411827  | 3.55497426669225 | 5.47769595026044  |
| Mn | 8.59371469657106  | 4.71746516717112 | 5.20716547013646  |



**[Mn<sup>III</sup>(OO'Bu)(N4S)]<sup>+</sup> - triplet reactant (TPSSh)**

|   |                   |                  |                   |
|---|-------------------|------------------|-------------------|
| C | 5.88926213091932  | 1.39776101010479 | 3.98265970309290  |
| H | 5.54693934529748  | 0.94860768089202 | 3.03732984589603  |
| H | 5.01713679058332  | 1.47304337099447 | 4.64764919848215  |
| H | 6.61594332794045  | 0.72165953666511 | 4.45172203801074  |
| C | 5.46160566566467  | 3.64210621401267 | 2.93538313467706  |
| H | 5.85595989247077  | 4.64491503868868 | 2.72535177852333  |
| H | 4.51452827276932  | 3.73846052227696 | 3.48452196053359  |
| H | 5.25253587964621  | 3.14358736169468 | 1.97457241851595  |
| C | 6.46548476526402  | 2.81239256876884 | 3.77182142667214  |
| C | 7.77140133967169  | 2.82938169452569 | 3.01140142487090  |
| C | 7.87455100791362  | 1.95427048843364 | 1.78762979492855  |
| H | 8.06493024514750  | 2.55358193168087 | 0.88313550502841  |
| H | 6.95447085647893  | 1.38317698186348 | 1.62823228050900  |
| H | 8.70757606120237  | 1.23939525603231 | 1.88460189735521  |
| C | 9.95654433049456  | 3.59764547119867 | 2.58213292831593  |
| H | 9.70316988524057  | 3.44450125399237 | 1.52462389573011  |
| H | 10.55120826795887 | 2.72175322388150 | 2.89809571019735  |
| C | 10.81897816630764 | 4.84692546974700 | 2.67434246806129  |
| H | 11.63713765593869 | 4.71838399419835 | 1.94859545481286  |
| H | 10.25227354220574 | 5.73018537380939 | 2.34224238559943  |
| C | 11.44725471529370 | 5.08040056903383 | 4.03754057959463  |
| H | 11.79993500264032 | 4.12505255139474 | 4.45135836939073  |
| H | 12.32324229443915 | 5.74717003307034 | 3.95258898766311  |
| C | 10.24523334732391 | 7.09855230842043 | 4.69902422993664  |
| H | 11.12833306252970 | 7.56786846387360 | 4.23726280653453  |
| H | 10.04709088009463 | 7.61635298755644 | 5.64880310334648  |
| C | 9.01638653284584  | 7.28990827568736 | 3.85802447002976  |
| C | 8.96295032120660  | 8.26267639236157 | 2.86565245389802  |
| H | 9.87118010207032  | 8.79053952997252 | 2.57105428669248  |
| C | 7.72665040942319  | 8.55297808344225 | 2.28153608845908  |
| H | 7.64518809458238  | 9.28442887756758 | 1.47531972926838  |
| C | 6.59620893668041  | 7.93999246587190 | 2.80639901534767  |
| H | 5.59952609340968  | 8.21074958745797 | 2.45486118313919  |
| C | 6.71148729305245  | 6.98837857949632 | 3.83659133134249  |
| C | 5.48299267141434  | 6.56718619091406 | 4.58092475431556  |
| H | 5.58677925542529  | 5.57194650169527 | 5.02711613826167  |
| H | 4.59162096958189  | 6.61593699356010 | 3.94156951129188  |
| H | 5.34395944626703  | 7.28428209896777 | 5.40811394016460  |
| C | 11.06982333637461 | 5.54864085453412 | 6.38842956317057  |
| H | 10.44934517799076 | 6.15748369925744 | 7.05967322622506  |
| H | 12.11128374713606 | 5.91067891310321 | 6.42469959412743  |
| C | 10.98711979630303 | 4.11485029267197 | 6.81986401238720  |
| C | 11.88460928444429 | 3.60469590533840 | 7.75303238248240  |
| H | 12.66156548316416 | 4.25072880953555 | 8.16413445351692  |
| C | 11.76468560252063 | 2.27219524285821 | 8.14026952994839  |
| H | 12.43846630768492 | 1.83939082069465 | 8.88195225846679  |
| C | 10.78576261050547 | 1.49760386545908 | 7.52753219300333  |
| H | 10.68152788245757 | 0.43856727911714 | 7.76616306494442  |
| C | 9.92364136756102  | 2.05918358088873 | 6.57531650516897  |
| C | 8.92366878476235  | 1.18206139982841 | 5.89348791426683  |
| H | 7.90998930894607  | 1.41036314803422 | 6.25269131774212  |
| H | 9.15214400373919  | 0.12568696153995 | 6.08474407606160  |
| H | 8.93164139005673  | 1.36090938477723 | 4.81075874322244  |
| C | 7.56036853853544  | 5.44881229345816 | 8.97839415731027  |
| C | 6.09829603975934  | 5.29522252184682 | 8.55933337057732  |
| H | 5.90522614135928  | 5.85658421139399 | 7.63497442863500  |
| H | 5.43274675651330  | 5.67940965032269 | 9.34752478368074  |
| H | 5.85783742600927  | 4.23727957897246 | 8.38035189577206  |
| C | 7.92966588324784  | 6.91289340391545 | 9.22399239053270  |
| H | 8.99415117282147  | 7.00207829472880 | 9.49172863995105  |
| H | 7.33030454789194  | 7.32419534682969 | 10.05042636851679 |
| H | 7.73818097424054  | 7.51438574551095 | 8.32409811108180  |
| C | 7.89120365231829  | 4.57538794362150 | 10.19008063432689 |
| H | 7.66970139124243  | 3.51953570311769 | 9.97526027422996  |
| H | 7.28713860667760  | 4.89051271252535 | 11.05396883642588 |
| H | 8.95509884862411  | 4.66560045510655 | 10.45569079284708 |
| N | 10.50793456718265 | 5.67852059936607 | 5.02222527929224  |

|    |                   |                  |                  |
|----|-------------------|------------------|------------------|
| N  | 8.72519714738966  | 3.61751591227947 | 3.39437481252476 |
| N  | 7.93298518086120  | 6.57858102441816 | 4.25727752407234 |
| N  | 10.00186289453285 | 3.37423263638883 | 6.25745825190547 |
| O  | 8.276130181118564 | 5.64633607601486 | 6.73107012691167 |
| O  | 8.43190974657753  | 4.88192738720009 | 7.96322197850044 |
| S  | 6.69939513691926  | 3.56121874448515 | 5.43455822570649 |
| Mn | 8.59431722506552  | 4.68984766705271 | 5.21393905397386 |

**[Mn<sup>III</sup>(OO<sup>t</sup>Bu)(N4S)]<sup>+</sup> - quintet reactant (TPSSh)**

|   |                   |                  |                  |
|---|-------------------|------------------|------------------|
| C | 5.76818905917193  | 1.36985238895903 | 4.25219215301310 |
| H | 5.51634072167792  | 0.78040602090762 | 3.35681686953581 |
| H | 4.84690708016692  | 1.49133061866557 | 4.83904348224321 |
| H | 6.48416945557041  | 0.80448825667384 | 4.86176276292326 |
| C | 5.30125208729509  | 3.43941029494264 | 2.90627294263453 |
| H | 5.66681938207312  | 4.42004764896312 | 2.57662549223583 |
| H | 4.33394090988978  | 3.57539332070746 | 3.41012836174139 |
| H | 5.14242930997764  | 2.80514439125857 | 2.01913344871618 |
| C | 6.29688542410118  | 2.77249828797561 | 3.88888810482988 |
| C | 7.62963983597559  | 2.75700423103828 | 3.18136574336440 |
| C | 7.80346729318299  | 1.78265463762117 | 2.04481661856802 |
| H | 7.95361249324379  | 2.31207640910267 | 1.09041203238674 |
| H | 6.92879468670363  | 1.13326447038817 | 1.94042193644833 |
| H | 8.68898972996749  | 1.14907403154550 | 2.20937627909380 |
| C | 9.79676037039092  | 3.60462034481614 | 2.72287230357583 |
| H | 9.57197147684415  | 3.32918911223165 | 1.68436792409765 |
| H | 10.45646524852047 | 2.82003338590639 | 3.13335415868963 |
| C | 10.53451695858850 | 4.93768050798659 | 2.70395931687714 |
| H | 11.29354169298142 | 4.86601019277160 | 1.90921872233683 |
| H | 9.85207621709500  | 5.74628079282284 | 2.40368999407169 |
| C | 11.26786257588872 | 5.27255577753961 | 3.99468688308559 |
| H | 11.77494084473465 | 4.36755984088126 | 4.35803313315970 |
| H | 12.04600453079281 | 6.03338571071996 | 3.81114302699800 |
| C | 10.13720724807360 | 7.21526220501908 | 4.97069851635992 |
| H | 11.08000264032902 | 7.74648190789944 | 4.75984587185458 |
| H | 9.75953543638321  | 7.54952514415679 | 5.94752292399975 |
| C | 9.08367682478426  | 7.55446642828086 | 3.95509970102875 |
| C | 9.27697292958423  | 8.53107416916685 | 2.98095435237084 |
| H | 10.24946286352211 | 9.01286958976345 | 2.86720688584724 |
| C | 8.19270090519124  | 8.87648304139404 | 2.16756381977471 |
| H | 8.30488342571367  | 9.62234937834489 | 1.37799922616370 |
| C | 6.95991210894741  | 8.28042627897895 | 2.40997868807120 |
| H | 6.07821696988438  | 8.56670289342445 | 1.83404720106543 |
| C | 6.83416373093416  | 7.31925496220472 | 3.43038996403289 |
| C | 5.48460780314193  | 6.80916205255141 | 3.83616181842556 |
| H | 5.56529060554814  | 5.86256994045623 | 4.38493531747254 |
| H | 4.81314151675592  | 6.70140046375634 | 2.97266290149637 |
| H | 5.02815451942239  | 7.54738672875320 | 4.51760659601711 |
| C | 11.05449285447298 | 5.52229392664941 | 6.39722377033465 |
| H | 10.45135628725569 | 6.02642548696622 | 7.16568915586272 |
| H | 12.06693447988284 | 5.96152592166536 | 6.39795844945172 |
| C | 11.10661959424236 | 4.05786771664016 | 6.72956083593439 |
| C | 12.10313167130244 | 3.54618858507423 | 7.56138166928327 |
| H | 12.89633577943747 | 4.19701547113230 | 7.93293024791844 |
| C | 12.04822278026940 | 2.19760591024544 | 7.91087551982053 |
| H | 12.80354737729000 | 1.76137000035707 | 8.56753163976047 |
| C | 11.01307291709793 | 1.41574432888129 | 7.40228618488374 |
| H | 10.93696548684779 | 0.35652983372512 | 7.65191041311415 |
| C | 10.05870540342831 | 1.99345418321916 | 6.55421101613165 |
| C | 8.94279328234091  | 1.18039957156009 | 5.97522057919807 |
| H | 7.99391096747922  | 1.72549606789698 | 6.09059515693953 |
| H | 8.86972514444524  | 0.20029561255716 | 6.46376547395360 |
| H | 9.10890382933981  | 1.01125558758785 | 4.89880602494945 |
| C | 7.56690248692638  | 5.30376422249150 | 9.05653803371794 |
| C | 6.10706541695626  | 5.04061037800053 | 8.69585435076659 |
| H | 5.80435939250100  | 5.65597577936879 | 7.83720832735738 |
| H | 5.45917524674758  | 5.29155115813021 | 9.54943285911713 |
| H | 5.95553492225015  | 3.98221407974013 | 8.43994784327192 |
| C | 7.81618810210276  | 6.77169220512524 | 9.40240020884143 |

|    |                   |                  |                   |
|----|-------------------|------------------|-------------------|
| H  | 8.88003996714912  | 6.93720982431797 | 9.63281469692051  |
| H  | 7.22193820185099  | 7.06392329029775 | 10.28136810057507 |
| H  | 7.52995011872740  | 7.41798799093586 | 8.56045243344041  |
| C  | 8.05402337361611  | 4.36729175395412 | 10.16341206865555 |
| H  | 7.91512400570608  | 3.31683198982589 | 9.86828823099937  |
| H  | 7.48007004005697  | 4.55137297488641 | 11.08356318870216 |
| H  | 9.11982484322667  | 4.53698442788104 | 10.37729351603676 |
| N  | 10.38802321648595 | 5.75812845486996 | 5.09360917414267  |
| N  | 8.54979040599491  | 3.60658849100587 | 3.51094064477395  |
| N  | 7.90892434250796  | 6.92097486864314 | 4.13781189615146  |
| N  | 10.11408629864250 | 3.30226051814506 | 6.23210034201717  |
| O  | 8.13420921308455  | 5.71878671760485 | 6.79262378587341  |
| O  | 8.44369672311040  | 4.91446122375857 | 7.95651465929208  |
| S  | 6.40920464853768  | 3.73787140069790 | 5.44883100361968  |
| Mn | 8.41622726563436  | 4.74392718758433 | 5.26027802358269  |

**[Mn<sup>III</sup>(OO<sup>t</sup>Bu)(N4S)]<sup>+</sup> - singlet transition state (TPSSh)**

|   |                   |                  |                  |
|---|-------------------|------------------|------------------|
| C | 5.87802259149797  | 1.45410483075095 | 3.93899803514393 |
| H | 5.50785685170169  | 1.01783421847915 | 2.99820715771052 |
| H | 5.02431676136104  | 1.52781572484284 | 4.62792681508749 |
| H | 6.61353531612605  | 0.76924140809904 | 4.38093882171072 |
| C | 5.45091380027450  | 3.69608424267486 | 2.89012310477075 |
| H | 5.84456115798717  | 4.69676819251926 | 2.67091811482975 |
| H | 4.50426076026107  | 3.79382928410844 | 3.43960241424592 |
| H | 5.24103024527805  | 3.19110774316573 | 1.93287833103474 |
| C | 6.45561633064180  | 2.86866196267690 | 3.72569236187864 |
| C | 7.76138094700051  | 2.88212431563899 | 2.96179417099734 |
| C | 7.85911172227242  | 1.98798576936521 | 1.75154078553324 |
| H | 8.05635295384157  | 2.57438675153417 | 0.84030252261242 |
| H | 6.93929538468581  | 1.41531188887995 | 1.59819835318815 |
| H | 8.69219948232488  | 1.27521791684706 | 1.86269495208262 |
| C | 9.93623824167959  | 3.63653760930739 | 2.49680548718822 |
| H | 9.66895567427264  | 3.53751558488877 | 1.43528849780059 |
| H | 10.49519258809529 | 2.72347089259249 | 2.77013331301239 |
| C | 10.85586973219969 | 4.83850658543755 | 2.63300401171997 |
| H | 11.69309128910098 | 4.67571646913191 | 1.93676464443515 |
| H | 10.34811884440888 | 5.75188622881805 | 2.28788003040005 |
| C | 11.44149014376594 | 5.03157902505690 | 4.02078917979656 |
| H | 11.71998479862918 | 4.05912746453880 | 4.44954720965394 |
| H | 12.35563032751881 | 5.64882932438049 | 3.97176710010981 |
| C | 10.26579759043869 | 7.09334350050337 | 4.57827972153523 |
| H | 11.15233691637479 | 7.52534601672890 | 4.08769358785799 |
| H | 10.08132277407601 | 7.66466226970172 | 5.50033265866993 |
| C | 9.03330642291096  | 7.26104956686588 | 3.73418903505730 |
| C | 8.96958045830691  | 8.22840194761321 | 2.73667589631314 |
| H | 9.87502633488994  | 8.75536987907025 | 2.43248274333018 |
| C | 7.72867314582631  | 8.51627747876222 | 2.16311042661920 |
| H | 7.64026962136237  | 9.24310138452206 | 1.35348082990162 |
| C | 6.60148316436848  | 7.91307137807555 | 2.70659127811681 |
| H | 5.60168006782614  | 8.18972268552141 | 2.36923916430715 |
| C | 6.72289339205115  | 6.96513655256713 | 3.73860512237061 |
| C | 5.50309834909114  | 6.56965145579705 | 4.51071086141794 |
| H | 5.58132298075594  | 5.56620203800707 | 4.94346543488467 |
| H | 4.59813385261178  | 6.66037178367499 | 3.89588224917166 |
| H | 5.41380323196121  | 7.27796213915173 | 5.35264072955152 |
| C | 11.05402081435677 | 5.59332539209233 | 6.34654146406951 |
| H | 10.44879663731028 | 6.23704532376428 | 6.99891980907586 |
| H | 12.10614411991771 | 5.92402237154621 | 6.37397445195340 |
| C | 10.92689003555753 | 4.17507460915626 | 6.82146076696183 |
| C | 11.78296807539295 | 3.68257267430139 | 7.80063712611361 |
| H | 12.55095285675881 | 4.33128820879235 | 8.22390088912808 |
| C | 11.62600184884317 | 2.36531102612209 | 8.22324297102572 |
| H | 12.26022724472744 | 1.94740378692302 | 9.00721314538089 |
| C | 10.66687491303270 | 1.58258568688801 | 7.59011441618239 |
| H | 10.54195506077022 | 0.53151494861176 | 7.85280104563205 |
| C | 9.85387121927684  | 2.12512979665185 | 6.58540298609949 |
| C | 8.89441677577808  | 1.23153521278277 | 5.86810789758420 |
| H | 7.85983586999006  | 1.49102236173900 | 6.13597939899095 |

|    |                   |                  |                   |
|----|-------------------|------------------|-------------------|
| H  | 9.09203972201778  | 0.18203360556571 | 6.12150739064087  |
| H  | 8.99046292499185  | 1.35888460778420 | 4.78085700690699  |
| C  | 7.66670381644486  | 5.32405619995033 | 9.17541607948449  |
| C  | 6.22803250991419  | 5.06746190862417 | 8.70707561499740  |
| H  | 6.04396085931003  | 5.59047445155235 | 7.75711692079396  |
| H  | 5.49882073167366  | 5.42437910229303 | 9.45144958707040  |
| H  | 6.06976952383766  | 3.99158921023873 | 8.54273033821822  |
| C  | 7.93671647674904  | 6.82150665103450 | 9.37782660853412  |
| H  | 8.97506707479878  | 6.97914524304049 | 9.70860986876306  |
| H  | 7.26094183400779  | 7.24749177143116 | 10.13597176127142 |
| H  | 7.78313660929641  | 7.36130721026483 | 8.43195102278354  |
| C  | 7.94909534174410  | 4.54524180089437 | 10.48152138335100 |
| H  | 7.77774655519790  | 3.46960445894023 | 10.33077390936457 |
| H  | 7.27423963278721  | 4.90503511434932 | 11.27415823169816 |
| H  | 8.98892774322335  | 4.69903954066578 | 10.80476296780317 |
| N  | 10.50478609053135 | 5.68817846721460 | 4.97160027943523  |
| N  | 8.71472622138416  | 3.67636406449077 | 3.32182843144018  |
| N  | 7.95075266516505  | 6.54787324916969 | 4.13661721517892  |
| N  | 9.95514441275152  | 3.43198828366547 | 6.24388505407264  |
| O  | 8.31272417673807  | 5.68427199409979 | 6.57800955959127  |
| O  | 8.59603918881989  | 4.75695648198324 | 8.28328040193923  |
| S  | 6.70683092417586  | 3.59162805422289 | 5.40881857389876  |
| Mn | 8.57120824494624  | 4.81359661885386 | 5.21324527051445  |

### [Mn<sup>III</sup>(OO'Bu)(N4S)]<sup>+</sup> - triplet transition state (TPSSh)

|   |                   |                  |                   |
|---|-------------------|------------------|-------------------|
| C | 5.86853006402741  | 1.45580204049027 | 3.97804958779295  |
| H | 5.52801863541711  | 0.98769461849573 | 3.04144996361643  |
| H | 4.99077307265315  | 1.56325528226380 | 4.63141993259982  |
| H | 6.57917542108297  | 0.78093944350324 | 4.47179090266375  |
| C | 5.48334104805336  | 3.66603588600163 | 2.85010303159331  |
| H | 5.88726775220236  | 4.65973439476673 | 2.61663517534418  |
| H | 4.52471590856617  | 3.78246981652305 | 3.37486887746737  |
| H | 5.29245797726749  | 3.13710763820470 | 1.90196469338859  |
| C | 6.46524112667234  | 2.85589744261146 | 3.73081560082837  |
| C | 7.78389918096053  | 2.84353791851045 | 2.98906944588203  |
| C | 7.89696313113691  | 1.92725903919692 | 1.79673485617524  |
| H | 8.09392601780054  | 2.49843051079337 | 0.87568486475946  |
| H | 6.98217988151764  | 1.34500242631516 | 1.64850936067087  |
| H | 8.73449168466946  | 1.22315305529362 | 1.92648878994697  |
| C | 9.96921194226060  | 3.60421049975459 | 2.54960541517428  |
| H | 9.72589782091116  | 3.44722344009121 | 1.48955579957822  |
| H | 10.55450326877074 | 2.72556037621255 | 2.87564738389147  |
| C | 10.83794119992118 | 4.84865820870381 | 2.64847352307145  |
| H | 11.67156398735252 | 4.70848133656596 | 1.94293192697897  |
| H | 10.28432457778664 | 5.73129818710312 | 2.29397474462772  |
| C | 11.43838982068564 | 5.09492534453135 | 4.02273531378204  |
| H | 11.77079291590420 | 4.14227829255954 | 4.45865934526843  |
| H | 12.32428953872814 | 5.74908666439502 | 3.94431570521509  |
| C | 10.23510540154826 | 7.13164546942401 | 4.62525133168893  |
| H | 11.12567847899813 | 7.59635745655515 | 4.17316745913711  |
| H | 10.00946661835480 | 7.66945592708106 | 5.55801450257150  |
| C | 9.02543757395208  | 7.29265955618678 | 3.75110505410157  |
| C | 8.98597423115048  | 8.25292961727481 | 2.745568837331262 |
| H | 9.89784970814260  | 8.78131430356733 | 2.46378760926284  |
| C | 7.76088332133137  | 8.53061722983342 | 2.13462950076907  |
| H | 7.69123419508462  | 9.25024806710090 | 1.31680840934472  |
| C | 6.62305916546869  | 7.92538997084337 | 2.65252797416311  |
| H | 5.63136613960309  | 8.19396532510557 | 2.28590322572833  |
| C | 6.71988741815501  | 6.98764064826412 | 3.69711709437210  |
| C | 5.47619487275124  | 6.60201181913776 | 4.43548261198116  |
| H | 5.52584030514641  | 5.59392102342706 | 4.85917403168992  |
| H | 4.58880235992137  | 6.71561868957905 | 3.79913620682274  |
| H | 5.37805491928218  | 7.29977735169674 | 5.28504874559790  |
| C | 11.03952440546751 | 5.61293118472832 | 6.35956187531624  |
| H | 10.41175109920218 | 6.22543025004822 | 7.02089261315792  |
| H | 12.08432401913604 | 5.96353794658651 | 6.40150309279628  |
| C | 10.92988631664292 | 4.18614172269677 | 6.80127067096748  |
| C | 11.81623909880605 | 3.66721556649611 | 7.73780218651267  |

|    |                   |                  |                   |
|----|-------------------|------------------|-------------------|
| H  | 12.60432482775151 | 4.30342349168920 | 8.14228385911472  |
| C  | 11.66592000974751 | 2.34406562495825 | 8.14370591184086  |
| H  | 12.32869965170662 | 1.90617081460684 | 8.89222729079650  |
| C  | 10.66842831052561 | 1.58565335635624 | 7.54329449172252  |
| H  | 10.53601680804048 | 0.53394842386936 | 7.79919523694641  |
| C  | 9.81667555819906  | 2.15237382579523 | 6.585066641867283 |
| C  | 8.78893141893863  | 1.28244621279983 | 5.93860844151711  |
| H  | 7.79287202248735  | 1.50707281272137 | 6.34638172889379  |
| H  | 9.02571364035633  | 0.22512164795248 | 6.11466088329778  |
| H  | 8.74903460220553  | 1.46706316344219 | 4.85834441051051  |
| C  | 7.67855673410244  | 5.29862484492159 | 9.16209021603873  |
| C  | 6.23246415630546  | 5.04849911819867 | 8.71493969672889  |
| H  | 6.03210138147102  | 5.58287502437285 | 7.77503321649067  |
| H  | 5.51655075057511  | 5.39576358710990 | 9.47671093756237  |
| H  | 6.07084965666003  | 3.97424774261694 | 8.54152551732583  |
| C  | 7.95099236704073  | 6.79407905110870 | 9.37382534116144  |
| H  | 8.99395725226990  | 6.94876746158192 | 9.69198961348695  |
| H  | 7.28627554193709  | 7.21334776207410 | 10.14552601508590 |
| H  | 7.78461995341593  | 7.34154778943985 | 8.43473200271239  |
| C  | 7.98207949809571  | 4.50841804096450 | 10.45398623399182 |
| H  | 7.80726756353937  | 3.43403560063900 | 10.29641374638257 |
| H  | 7.32348397533347  | 4.85904916835027 | 11.26432527109587 |
| H  | 9.02809789934589  | 4.65705217334814 | 10.76009604984769 |
| N  | 10.49443206446440 | 5.72329582827141 | 4.98528871591131  |
| N  | 8.73330371491495  | 3.64193342470455 | 3.35044500926208  |
| N  | 7.93727566743078  | 6.57771048291852 | 4.13446438528085  |
| N  | 9.93007742944566  | 3.45864915202454 | 6.24384789669191  |
| O  | 8.29345637012583  | 5.66441490389337 | 6.60948950459047  |
| O  | 8.59630500042845  | 4.74139491543255 | 8.24633191564405  |
| S  | 6.66617189768586  | 3.65765532116635 | 5.38841099517265  |
| Mn | 8.57319165295699  | 4.77370124414932 | 5.21600723660929  |

### [Mn<sup>III</sup>(OO<sup>t</sup>Bu)(N4S)]<sup>+</sup> - quintet transition state (TPSSh)

|   |                   |                  |                   |
|---|-------------------|------------------|-------------------|
| C | 5.86853006402741  | 1.45580204049027 | 3.97804958779295  |
| H | 5.52801863541711  | 0.98769461849573 | 3.04144996361643  |
| H | 4.99077307265315  | 1.56325528226380 | 4.631411993259982 |
| H | 6.57917542108297  | 0.78093944350324 | 4.47179090266375  |
| C | 5.48334104805336  | 3.66603588600163 | 2.85010303159331  |
| H | 5.88726775220236  | 4.65973439476673 | 2.61663517534418  |
| H | 4.52471590856617  | 3.78246981652305 | 3.37486887746737  |
| H | 5.29245797726749  | 3.13710763820470 | 1.90196469338859  |
| C | 6.46524112667234  | 2.85589744261146 | 3.73081560082837  |
| C | 7.78389918096053  | 2.84353791851045 | 2.98906944588203  |
| C | 7.89696313113691  | 1.92725903919692 | 1.79673485617524  |
| H | 8.09392601780054  | 2.49843051079337 | 0.87568486475946  |
| H | 6.98217988151764  | 1.34500242631516 | 1.64850936067087  |
| H | 8.73449168466946  | 1.22315305529362 | 1.92648878994697  |
| C | 9.96921194226060  | 3.60421049975459 | 2.54960541517428  |
| H | 9.72589782091116  | 3.44722344009121 | 1.48955579957822  |
| H | 10.55450326877074 | 2.72556037621255 | 2.87564738389147  |
| C | 10.83794119992118 | 4.84865820870381 | 2.64847352307145  |
| H | 11.67156398735252 | 4.70848133656596 | 1.94293192697897  |
| H | 10.28432457778664 | 5.73129818710312 | 2.29397474462772  |
| C | 11.43838982068564 | 5.09492534453135 | 4.02273531378204  |
| H | 11.77079291590420 | 4.14227829255954 | 4.45865934526843  |
| H | 12.32428953872814 | 5.74908666439502 | 3.94431570521509  |
| C | 10.23510540154826 | 7.13164546942401 | 4.62525133168893  |
| H | 11.12567847899813 | 7.59635745655515 | 4.17316745913711  |
| H | 10.00946661835480 | 7.66945592708106 | 5.55801450257150  |
| C | 9.02543757395208  | 7.29265955618678 | 3.75110505410157  |
| C | 8.98597423115048  | 8.25292961727481 | 2.74556837331262  |
| H | 9.89784970814260  | 8.78131430356733 | 2.46378760926284  |
| C | 7.76088332133137  | 8.53061722983342 | 2.13462950076907  |
| H | 7.69123419508462  | 9.25024806710090 | 1.31680840934472  |
| C | 6.62305916546869  | 7.92538997084337 | 2.65252797416311  |
| H | 5.63136613960309  | 8.19396532510557 | 2.28590322572833  |
| C | 6.71988741815501  | 6.98764064826412 | 3.69711709437210  |
| C | 5.47619487275124  | 6.60201181913776 | 4.43548261198116  |

|    |                   |                   |                   |
|----|-------------------|-------------------|-------------------|
| H  | 5.52584030514641  | 5.59392102342706  | 4.85917403168992  |
| H  | 4.58880235992137  | 6.71561868957905  | 3.79913620682274  |
| H  | 5.37805491928218  | 7.29977735169674  | 5.28504874559790  |
| C  | 11.03952440546751 | 5.61293118472832  | 6.35956187531624  |
| H  | 10.41175109920218 | 6.22543025004822  | 7.02089261315792  |
| H  | 12.08432401913604 | 5.96353794658651  | 6.40150309279628  |
| C  | 10.92988631664292 | 4.18614172269677  | 6.80127067096748  |
| C  | 11.81623909880605 | 3.66721556649611  | 7.73780218651267  |
| H  | 12.60432482775151 | 4.30342349168920  | 8.14228385911472  |
| C  | 11.66592000974751 | 2.34406562495825  | 8.14370591184086  |
| H  | 12.32869965170662 | 1.90617081460684  | 8.89222729079650  |
| C  | 10.66842831052561 | 1.58565335635624  | 7.54329449172252  |
| H  | 10.53601680804048 | 0.53394842386936  | 7.79919523694641  |
| C  | 9.81667555819906  | 2.15237382579523  | 6.58506641867283  |
| C  | 8.78893141893863  | 1.28244621279983  | 5.93860844151711  |
| H  | 7.79287202248735  | 1.50707281272137  | 6.34638172889379  |
| H  | 9.02571364035633  | 0.22512164795248  | 6.11466088329778  |
| H  | 8.74903460220553  | 1.46706316344219  | 4.85834441051051  |
| C  | 7.67855673410244  | 5.29862484492159  | 9.16209021603873  |
| C  | 6.23246415630546  | 5.04849911819867  | 8.71493969672889  |
| H  | 6.03210138147102  | 5.58287502437285  | 7.77503321649067  |
| H  | 5.51655075057511  | 5.39576358710990  | 9.47671093756237  |
| H  | 6.07084965666003  | 3.974242774261694 | 8.54152551732583  |
| C  | 7.95099236704073  | 6.79407905110870  | 9.37382534116144  |
| H  | 8.99395725226990  | 6.94876746158192  | 9.69198961348695  |
| H  | 7.28627554193709  | 7.21334776207410  | 10.14552601508590 |
| H  | 7.78461995341593  | 7.34154778943985  | 8.43473200271239  |
| C  | 7.98207949809571  | 4.50841804096450  | 10.45398623399182 |
| H  | 7.80726756353937  | 3.43403560063900  | 10.29641374638257 |
| H  | 7.32348397533347  | 4.85904916835027  | 11.26432527109587 |
| H  | 9.02809789934589  | 4.65705217334814  | 10.76009604984769 |
| N  | 10.49443206446440 | 5.72329582827141  | 4.98528871591131  |
| N  | 8.73330371491495  | 3.64193342470455  | 3.35044500926208  |
| N  | 7.93727566743078  | 6.57771048291852  | 4.13446438528085  |
| N  | 9.93007742944566  | 3.45864915202454  | 6.24384789669191  |
| O  | 8.29345637012583  | 5.66441490389337  | 6.60948950459047  |
| O  | 8.59630500042845  | 4.74139491543255  | 8.24633191564405  |
| S  | 6.66617189768586  | 3.65765532116635  | 5.38841099517265  |
| Mn | 8.57319165295699  | 4.77370124414932  | 5.21600723660929  |

### [Mn<sup>III</sup>(OO<sup>t</sup>Bu)(N4S)]<sup>+</sup> - singlet product complex (TPSSh)

|   |                   |                  |                  |
|---|-------------------|------------------|------------------|
| C | 5.63790956293384  | 1.64455418308344 | 3.69786319157941 |
| H | 5.32157541596143  | 1.19488153608841 | 2.74379142019162 |
| H | 4.73612803639442  | 1.78974124397835 | 4.30988828172976 |
| H | 6.29358046009297  | 0.93708332559296 | 4.22198056415253 |
| C | 5.42461298986082  | 3.86388462401230 | 2.54389464278976 |
| H | 5.88475484720962  | 4.83725077307190 | 2.33052731958761 |
| H | 4.43977184558139  | 4.02514773187723 | 3.00399268692027 |
| H | 5.27417255581441  | 3.33735300607243 | 1.58709282740926 |
| C | 6.30976126775428  | 3.01773556183230 | 3.48999153566987 |
| C | 7.67151170337990  | 2.93784025478306 | 2.83545479278417 |
| C | 7.81494006156313  | 1.99488297796267 | 1.66720013206477 |
| H | 8.11877610329424  | 2.53281035498780 | 0.75550543506964 |
| H | 6.87902784159297  | 1.46759390832374 | 1.45870270812568 |
| H | 8.59356359961678  | 1.24243438281220 | 1.87227698267888 |
| C | 9.90993388572330  | 3.56958392441006 | 2.51638428526861 |
| H | 9.71974433533803  | 3.42971748116155 | 1.44305770693025 |
| H | 10.40858840620126 | 2.65072831839689 | 2.87405905015395 |
| C | 10.86194232022605 | 4.74316594007604 | 2.67098422728818 |
| H | 11.73495600859149 | 4.53108345806774 | 2.03452794994769 |
| H | 10.40847932834568 | 5.66180452983038 | 2.26872510045004 |
| C | 11.36440103948764 | 4.95614697246547 | 4.08689092414966 |
| H | 11.59137349004306 | 3.98689945485409 | 4.55220078517755 |
| H | 12.29668630447888 | 5.54736662198199 | 4.08333125162549 |
| C | 10.24522299494751 | 7.07093282397989 | 4.55246221971102 |
| H | 11.18568567809656 | 7.46361483953085 | 4.13484800849489 |
| H | 10.00934198573679 | 7.65254044400288 | 5.45631601573161 |
| C | 9.09418187259511  | 7.28084471415348 | 3.61075050517338 |

|    |                   |                  |                   |
|----|-------------------|------------------|-------------------|
| C  | 9.15554337659399  | 8.23222680410772 | 2.59820235727796  |
| H  | 10.10623041585962 | 8.71162904635595 | 2.36109518547266  |
| C  | 7.97908487139496  | 8.56554395751712 | 1.92283537406293  |
| H  | 7.98916183852221  | 9.28085323458471 | 1.09830690453941  |
| C  | 6.78545521586198  | 8.02459535616131 | 2.38338532486994  |
| H  | 5.82962046652969  | 8.34076645130273 | 1.96368363813059  |
| C  | 6.77833224367284  | 7.09223522531881 | 3.43674178596752  |
| C  | 5.48357513960925  | 6.77320910686479 | 4.11414690806288  |
| H  | 5.46161848960507  | 5.76345569562260 | 4.53982589223760  |
| H  | 4.63458908853091  | 6.93350702748825 | 3.43693105739765  |
| H  | 5.38430932415359  | 7.47615670821563 | 4.95940592562568  |
| C  | 10.85046528085300 | 5.55481514078143 | 6.37424249987173  |
| H  | 10.24275568288613 | 6.22974294556005 | 6.99177242615485  |
| H  | 11.91284634823948 | 5.83845098898937 | 6.46150478395499  |
| C  | 10.64003675073040 | 4.14478845995820 | 6.84234542868628  |
| C  | 11.45527374673950 | 3.60162018929338 | 7.83200754005096  |
| H  | 12.23075583284100 | 4.21758668834711 | 8.28790293658271  |
| C  | 11.25231049093035 | 2.27917312618627 | 8.21466475286335  |
| H  | 11.86093401921532 | 1.82071222045188 | 8.99630828673869  |
| C  | 10.27357744460865 | 1.54585996215653 | 7.55090529418902  |
| H  | 10.10602570795659 | 0.49461461944415 | 7.78802012753169  |
| C  | 9.49229454298863  | 2.14266423347845 | 6.55169075666011  |
| C  | 8.49948455606148  | 1.30620997319256 | 5.81108911962838  |
| H  | 7.47757232643483  | 1.65970654578528 | 6.01014850783347  |
| H  | 8.59530490231890  | 0.25297546209929 | 6.10422121766301  |
| H  | 8.66309009275998  | 1.38781385247440 | 4.72722880157841  |
| C  | 8.18090890823403  | 5.39543825150641 | 9.72553012575877  |
| C  | 7.77264732403796  | 3.97842353885161 | 9.29152370966987  |
| H  | 7.46049598890043  | 3.99337677754886 | 8.23755574933269  |
| H  | 6.93346237270179  | 3.60934898825349 | 9.90111503829726  |
| H  | 8.62077465872785  | 3.28683805501725 | 9.40154335448964  |
| C  | 7.03225851079732  | 6.40188397030583 | 9.55408959025548  |
| H  | 7.34879823806931  | 7.40347822041852 | 9.88006312233465  |
| H  | 6.15542581314442  | 6.09538255351193 | 10.14549657561421 |
| H  | 6.74621202823800  | 6.44794429664463 | 8.49343089990177  |
| C  | 8.66939322880798  | 5.38180571578327 | 11.20736998612632 |
| H  | 9.50147025465031  | 4.67502089797858 | 11.33289391702849 |
| H  | 7.82557106113835  | 5.06303449744562 | 11.83807151457245 |
| H  | 8.99308618236729  | 6.38524357786851 | 11.51547203275423 |
| N  | 10.39129562774510 | 5.65926778408727 | 4.96633614503472  |
| N  | 8.63403788840375  | 3.69679859597766 | 3.24392098064435  |
| N  | 7.95048191805456  | 6.62437976593466 | 3.93625656465079  |
| N  | 9.65231228941489  | 3.45128496692013 | 6.23251613211939  |
| O  | 8.10938103845186  | 5.74665575953568 | 6.43521347619041  |
| O  | 9.31510573425601  | 5.81822631169532 | 9.04928940584725  |
| S  | 6.46165474088528  | 3.78518215807461 | 5.16308215046657  |
| Mn | 8.40693705620683  | 4.92170190750852 | 5.08040114441842  |

**[Mn<sup>III</sup>(OO'Bu)(N4S)]<sup>+</sup> -triplet product complex (TPSSh)**

|   |                   |                  |                  |
|---|-------------------|------------------|------------------|
| C | 5.63154447730487  | 1.68715617936922 | 3.86787305423600 |
| H | 5.30750753445426  | 1.20165400116877 | 2.93442861817550 |
| H | 4.73240542789434  | 1.87163570885581 | 4.47322613166486 |
| H | 6.27616635111340  | 0.99205090982728 | 4.42019928846948 |
| C | 5.43291803029083  | 3.86058246877033 | 2.62986250083106 |
| H | 5.89917900200457  | 4.82220535179127 | 2.37864757876891 |
| H | 4.45470732677891  | 4.04709734264574 | 3.09496997217590 |
| H | 5.26610348247334  | 3.30108989777862 | 1.69492125188008 |
| C | 6.32177509843187  | 3.03922345838838 | 3.59567912850874 |
| C | 7.67305090359386  | 2.92001742341800 | 2.92399676014815 |
| C | 7.78684372776557  | 1.94916811016911 | 1.77546767737374 |
| H | 8.07488665381151  | 2.46497341030157 | 0.84600876634850 |
| H | 6.84359150641199  | 1.42332340576794 | 1.59743250396495 |
| H | 8.56495166282773  | 1.19702850291521 | 1.98296347093956 |
| C | 9.91934961750453  | 3.53829634196123 | 2.56962714447961 |
| H | 9.72393022855525  | 3.33970232954505 | 1.50654566714361 |
| H | 10.44423579444697 | 2.65156989234473 | 2.96869781528467 |
| C | 10.83614931594518 | 4.74851501379996 | 2.65953202272827 |
| H | 11.68932449503322 | 4.55270755243137 | 1.99171274621153 |

|    |                   |                  |                   |
|----|-------------------|------------------|-------------------|
| H  | 10.33116050011390 | 5.63965595727101 | 2.25689412061726  |
| C  | 11.39238105549435 | 5.01638889998258 | 4.04822999978378  |
| H  | 11.66621386012790 | 4.06528263524152 | 4.52640584249896  |
| H  | 12.30923803292744 | 5.62803309820319 | 3.98514024568441  |
| C  | 10.27943087725641 | 7.12755324794312 | 4.56210378032836  |
| H  | 11.21588976914522 | 7.53931127145040 | 4.15348995826543  |
| H  | 10.02783651443231 | 7.69110740357613 | 5.47291790947243  |
| C  | 9.13046982963461  | 7.33085395704302 | 3.61918485293455  |
| C  | 9.19662056994777  | 8.27181333045582 | 2.59692082042704  |
| H  | 10.14943837005577 | 8.74662455919447 | 2.35905089798862  |
| C  | 8.02395815546155  | 8.59939536447247 | 1.91323721219230  |
| H  | 8.03672120228425  | 9.30473826691771 | 1.08023210930258  |
| C  | 6.82940117015893  | 8.06452431715323 | 2.37772833233725  |
| H  | 5.87480868425774  | 8.37714748999732 | 1.95249780924736  |
| C  | 6.81764011879674  | 7.14547193101041 | 3.44316335842146  |
| C  | 5.51416295867628  | 6.84958078252769 | 4.11551653841525  |
| H  | 5.46565941683168  | 5.84108462100434 | 4.53754083852688  |
| H  | 4.67244384857144  | 7.03170855568679 | 3.43477878716518  |
| H  | 5.42645461928545  | 7.54875614441815 | 4.96497022264947  |
| C  | 10.92319148124134 | 5.60415946068143 | 6.35332783129164  |
| H  | 10.29886637964000 | 6.25129447828540 | 6.98489083653323  |
| H  | 11.98108133063447 | 5.90438303025116 | 6.43540902754954  |
| C  | 10.72945379090125 | 4.18982765372466 | 6.80225759114078  |
| C  | 11.59470382645318 | 3.61732773534901 | 7.72955491431516  |
| H  | 12.41293740630909 | 4.21265552172842 | 8.13527626503907  |
| C  | 11.38359763741480 | 2.30032788193590 | 8.12303040376072  |
| H  | 12.03115616738717 | 1.82162705886035 | 8.85982382557033  |
| C  | 10.33812198140397 | 1.60081996934115 | 7.53026811723050  |
| H  | 10.15109846791052 | 0.55646175431924 | 7.78216171116934  |
| C  | 9.50936899751632  | 2.21825614996723 | 6.58349970608457  |
| C  | 8.43067975850025  | 1.40638721129172 | 5.94380822161771  |
| H  | 7.44201603485313  | 1.74465942072849 | 6.28452081618947  |
| H  | 8.56064548998525  | 0.34534024612151 | 6.19237104913219  |
| H  | 8.45418727546640  | 1.52098264950300 | 4.85272335495554  |
| C  | 8.08835675407907  | 5.22658546807277 | 9.58249995928414  |
| C  | 7.52075281570004  | 3.87100671617636 | 9.13376926764884  |
| H  | 7.22722758457610  | 3.93215138397274 | 8.07586250585071  |
| H  | 6.63634399452662  | 3.59573003214391 | 9.72929970060194  |
| H  | 8.28087638740080  | 3.08339691817076 | 9.24732517764238  |
| C  | 7.05208623019850  | 6.35302654453971 | 9.44737181020005  |
| H  | 7.48644748368499  | 7.31004765218463 | 9.77192534256546  |
| H  | 6.16343094294249  | 6.13941964620250 | 10.06194508065293 |
| H  | 6.74817920710863  | 6.44208515027575 | 8.39480531279036  |
| C  | 8.59427776128818  | 5.13510037083875 | 11.05241914982403 |
| H  | 9.34972627197960  | 4.34290304714923 | 11.15339608016361 |
| H  | 7.73472544298748  | 4.89618621942784 | 11.69730369690458 |
| H  | 9.02797646944675  | 6.09294647692912 | 11.37122606287118 |
| N  | 10.44344042499317 | 5.71593991577202 | 4.95615256985682  |
| N  | 8.65001674826421  | 3.67471268630862 | 3.30284146071910  |
| N  | 7.98653597632289  | 6.67958559539869 | 3.95339205807763  |
| N  | 9.69247833063227  | 3.51916235233605 | 6.24286674681448  |
| O  | 8.17706004954595  | 5.78007793495847 | 6.48922576065765  |
| O  | 9.25053859930641  | 5.53354408434587 | 8.88570166525949  |
| S  | 6.48516860466451  | 3.90339333828288 | 5.22592260380331  |
| Mn | 8.45728070462214  | 4.91071210962071 | 5.11251358063396  |

### [Mn<sup>III</sup>(OO'Bu)(N4S)]<sup>+</sup> -quintet product complex (TPSSh)

|   |                  |                  |                  |
|---|------------------|------------------|------------------|
| C | 5.67368117006068 | 1.53887921666035 | 3.34151626766788 |
| H | 5.42377870590511 | 1.13225134403581 | 2.34941575156864 |
| H | 4.73520660382157 | 1.63095537927701 | 3.90707497659406 |
| H | 6.31742234977617 | 0.82009627005130 | 3.86475502809801 |
| C | 5.45033616307593 | 3.82001958569258 | 2.31290832725685 |
| H | 5.89900054171084 | 4.81242727063749 | 2.17381600406961 |
| H | 4.44902379493921 | 3.93800430707160 | 2.75026171826327 |
| H | 5.33874899815123 | 3.34898739582592 | 1.32272983059903 |
| C | 6.32128467674578 | 2.93481071620670 | 3.23621055087016 |
| C | 7.70820962962941 | 2.91454059768118 | 2.63210402598859 |
| C | 7.90508246613000 | 2.07123571264841 | 1.39647510466018 |



|    |                   |                  |                   |
|----|-------------------|------------------|-------------------|
| H  | 8.25636460921641  | 2.68231372016639 | 0.55058180454600  |
| H  | 6.97830309225837  | 1.57269355753919 | 1.09550399373443  |
| H  | 8.66739861834916  | 1.29587094866719 | 1.57549695245989  |
| C  | 9.96377355296111  | 3.57621146805743 | 2.48852409331685  |
| H  | 9.84318891677265  | 3.45888700817200 | 1.40277633679988  |
| H  | 10.47568978483882 | 2.66738639980085 | 2.85307521455528  |
| C  | 10.85369681544405 | 4.78411999955944 | 2.73398948496903  |
| H  | 11.75662417715498 | 4.64390354564981 | 2.11964745024718  |
| H  | 10.36865765615751 | 5.69814693412429 | 2.35880571588100  |
| C  | 11.30019743055234 | 4.95389097375134 | 4.17608521692121  |
| H  | 11.54889268701823 | 3.97300506071654 | 4.60522947960159  |
| H  | 12.21185173910068 | 5.57475762204573 | 4.22686329476508  |
| C  | 10.09913499488152 | 7.00589288008299 | 4.72084476915216  |
| H  | 11.04122114189558 | 7.45608711845973 | 4.36981685291884  |
| H  | 9.80019014002840  | 7.52145275009408 | 5.64566671704353  |
| C  | 8.98239638454289  | 7.23245870408560 | 7.74390156135902  |
| C  | 9.06199926271310  | 8.22751831920618 | 2.77542517155869  |
| H  | 10.01127431950891 | 8.73421597221114 | 2.59615767542597  |
| C  | 7.90542838909151  | 8.56786598643393 | 2.07031368170566  |
| H  | 7.93125604620675  | 9.31624647127120 | 1.27602099307252  |
| C  | 6.70698227441758  | 7.98873081267297 | 2.46710622561901  |
| H  | 5.76025777887029  | 8.30738236857626 | 2.02890974667714  |
| C  | 6.67951990403073  | 7.01334474077875 | 3.48093317944957  |
| C  | 5.36349094140724  | 6.65994033242733 | 4.09927413853914  |
| H  | 5.32842136987525  | 5.63529116498279 | 4.48256474683677  |
| H  | 4.53877571588438  | 6.84482283975905 | 3.39864033920061  |
| H  | 5.23121791650737  | 7.32770975010147 | 4.96803857433325  |
| C  | 10.67444722842577 | 5.40561356552352 | 6.47062615815783  |
| H  | 10.02481262205785 | 6.03482843281077 | 7.09266989413399  |
| H  | 11.72383216259967 | 5.70518630861926 | 6.62878808934886  |
| C  | 10.46484942428063 | 3.97227750515397 | 6.85247334916349  |
| C  | 11.22184028930730 | 3.39224928105608 | 7.86522922826634  |
| H  | 11.96102570958987 | 3.99540297699615 | 8.39173181499447  |
| C  | 11.00073664398404 | 2.05606665602945 | 8.18761728293422  |
| H  | 11.56341582542750 | 1.57121228549631 | 8.98745646653805  |
| C  | 10.06473778373373 | 1.34636065351087 | 7.44368049290196  |
| H  | 9.88561705288516  | 0.28752703982912 | 7.63368848997935  |
| C  | 9.33998045450457  | 1.97583479347463 | 6.42179639390837  |
| C  | 8.38610878169903  | 1.16186202902186 | 5.60733133416124  |
| H  | 7.34716197278652  | 1.41934553462923 | 5.85819063946574  |
| H  | 8.55230386704969  | 0.09246894554451 | 5.79078153768040  |
| H  | 8.52221584243873  | 1.36606243650860 | 4.53751136879016  |
| C  | 8.52093224599238  | 5.67495635108378 | 9.95107090931891  |
| C  | 8.02714504828945  | 4.25193459159154 | 9.64001625118226  |
| H  | 7.80129505968634  | 4.17396013826317 | 8.56598718684259  |
| H  | 7.11089490451380  | 4.02729914560366 | 10.20768152375420 |
| H  | 8.79666628217084  | 3.51173162169844 | 9.90501920143366  |
| C  | 7.46952471802173  | 6.73971940814981 | 9.59993361759449  |
| H  | 7.85108278895288  | 7.74451487156290 | 9.83413634993485  |
| H  | 6.54187883179578  | 6.57075448991909 | 10.16845088776759 |
| H  | 7.24046528830179  | 6.68064948003364 | 8.52568480688550  |
| C  | 8.92488185693743  | 5.78867240562875 | 11.45610784594441 |
| H  | 9.69202602130716  | 5.04322869152447 | 11.70691506997860 |
| H  | 8.02292037103775  | 5.59913185297285 | 12.05772283452309 |
| H  | 9.30505112991239  | 6.79491665059292 | 11.67825341867247 |
| N  | 10.27702154751721 | 5.58011334997694 | 5.05498522332862  |
| N  | 8.64769040571888  | 3.63671785665248 | 3.14518322062645  |
| N  | 7.84171511962926  | 6.54078175042240 | 4.00038401980755  |
| N  | 9.51670663922394  | 3.29431742908580 | 6.15910657099322  |
| O  | 7.92847383858384  | 5.45027740841589 | 6.47237326417618  |
| O  | 9.72207646880086  | 5.93527824567161 | 9.31114865428643  |
| S  | 6.37121837650582  | 3.63684701434365 | 4.94795109533384  |
| Mn | 8.30184963668952  | 4.71879655741540 | 5.03733951085967  |

**[Mn<sup>III</sup>(OO<sup>t</sup>Bu)(N4S)]<sup>+</sup> -singlet reactant (B3LYP-D3)**

|   |                  |                  |                  |
|---|------------------|------------------|------------------|
| C | 5.90921229291036 | 1.36947024419331 | 3.99853405625767 |
| H | 5.53583946211265 | 0.93427977167233 | 3.05902572688941 |
| H | 5.05898427115422 | 1.42177291039758 | 4.69358802721232 |

|   |                   |                  |                   |
|---|-------------------|------------------|-------------------|
| H | 6.65214235977306  | 0.68507863411146 | 4.42871381643244  |
| C | 5.45394463887371  | 3.61409392243361 | 2.97231206360039  |
| H | 5.83403724592911  | 4.62026883608794 | 2.75636438637711  |
| H | 4.50897333053044  | 3.70362523683561 | 3.52620296917555  |
| H | 5.23996419020895  | 3.11638963672433 | 2.01229202194539  |
| C | 6.47040187430542  | 2.79135309573897 | 3.79780093376397  |
| C | 7.77119110964282  | 2.82403554451036 | 3.02047666224555  |
| C | 7.87393423488767  | 1.93213576590686 | 1.80884039218660  |
| H | 8.06275515892415  | 2.51728235226199 | 0.89531333748321  |
| H | 6.96075576808417  | 1.35068465519276 | 1.65300844911281  |
| H | 8.71306911664411  | 1.22506689752966 | 1.91388537054867  |
| C | 9.93448975155043  | 3.62299225365868 | 2.55202676142236  |
| H | 9.67774158874247  | 3.48783606557914 | 1.49277389445212  |
| H | 10.53029324782559 | 2.73904721922409 | 2.84497304962162  |
| C | 10.80710746917565 | 4.86379867951951 | 2.65388958565627  |
| H | 11.62565679835150 | 4.73142885561870 | 1.92858706195140  |
| H | 10.25178102521476 | 5.75238267225671 | 2.31925978844080  |
| C | 11.43754105477757 | 5.08736133165070 | 4.01726323014913  |
| H | 11.79402796061992 | 4.12720486466329 | 4.41431106385927  |
| H | 12.31770634026047 | 5.74891742994103 | 3.93065765444881  |
| C | 10.24062675052352 | 7.09475483018722 | 4.69589866653711  |
| H | 11.11548053991782 | 7.57228482727448 | 4.22632365672148  |
| H | 10.05106599622722 | 7.61810326960963 | 5.64419474429376  |
| C | 9.00326647875045  | 7.28947809307828 | 3.86648527917364  |
| C | 8.94076815650683  | 8.28144909088999 | 2.89517041709045  |
| H | 9.84494406904004  | 8.82032803094975 | 2.60722431521230  |
| C | 7.70105708690202  | 8.57810844694633 | 2.32350392493102  |
| H | 7.61236032431144  | 9.32929307588966 | 1.53556180072701  |
| C | 6.57727430713829  | 7.94319596213754 | 2.83302634535220  |
| H | 5.57765953695319  | 8.21304569816613 | 2.48828975810100  |
| C | 6.70421961823508  | 6.96825739588637 | 3.83959771404700  |
| C | 5.47542088155181  | 6.51980284893366 | 4.56857609592071  |
| H | 5.60240802033194  | 5.54585008146293 | 5.04964853760116  |
| H | 4.59592923814588  | 6.51096482923914 | 3.91061463720135  |
| H | 5.28436059348570  | 7.25863731145325 | 5.36645778824001  |
| C | 11.08554339822253 | 5.54186165523183 | 6.37018980658735  |
| H | 10.49018094524945 | 6.16061679931814 | 7.05345024824444  |
| H | 12.13219880117658 | 5.89128240912836 | 6.39529554710733  |
| C | 10.99652976577298 | 4.11072700169557 | 6.81486110526204  |
| C | 11.88310189886656 | 3.61622966698757 | 7.76593427937735  |
| H | 12.64868271386582 | 4.27079717702848 | 8.18596556057864  |
| C | 11.76868821997297 | 2.28530646043523 | 8.15822627636402  |
| H | 12.43364070970666 | 1.86345710315801 | 8.91503251617982  |
| C | 10.81162850665324 | 1.49587495500019 | 7.53164577215631  |
| H | 10.71749371574980 | 0.43640895005177 | 7.77362772923941  |
| C | 9.96335813822229  | 2.04619289255878 | 6.56084174566176  |
| C | 8.99639653342758  | 1.15522207275731 | 5.84941249839602  |
| H | 7.96651786821942  | 1.39748317835883 | 6.14600489214535  |
| H | 9.20515653903686  | 0.10106369431087 | 6.07339614951260  |
| H | 9.06075474487955  | 1.30571486465710 | 4.76368221299607  |
| C | 7.53821034266609  | 5.47160947474747 | 8.97102484665835  |
| C | 6.07592517993593  | 5.48043168866509 | 8.52567198546947  |
| H | 5.94903327176115  | 6.10516482022649 | 7.63133938521518  |
| H | 5.43528684999581  | 5.88294614807365 | 9.32535645938527  |
| H | 5.73877194162557  | 4.46123929273513 | 8.28630544215935  |
| C | 8.04484251817230  | 6.88075475520362 | 9.28357996117328  |
| H | 9.10730282627976  | 6.85223217110324 | 9.57317950775561  |
| H | 7.47446917539898  | 7.31781282439855 | 10.11746611161553 |
| H | 7.93342065823445  | 7.53834476787008 | 8.40972281856706  |
| C | 7.75432903734476  | 4.52728553202367 | 10.15401707389375 |
| H | 7.42621130952681  | 3.50823048421725 | 9.90037501266071  |
| H | 7.17510507710940  | 4.87361481680106 | 11.02310002510099 |
| H | 8.81755280574756  | 4.49286406228612 | 10.43637144728682 |
| N | 10.51231603228336 | 5.68031395377304 | 5.01416250831625  |
| N | 8.71300976982373  | 3.63006382503202 | 3.37382322681534  |
| N | 7.92722517521516  | 6.56461066572600 | 4.24977096286526  |
| N | 10.03046672229745 | 3.35941036543214 | 6.24567531497607  |
| O | 8.28666537283140  | 5.65036034622914 | 6.73830231646601  |
| O | 8.36803367559737  | 4.86585392076072 | 7.94600302408152  |
| S | 6.72395132547874  | 3.52196358817329 | 5.47118443034083  |

Mn 8.59218954512999 4.70584594803038 5.21781281500477

**[Mn<sup>III</sup>(OO<sup>t</sup>Bu)(N4S)]<sup>+</sup> -triplet reactant (B3LYP-D3)**

|   |                   |                  |                   |
|---|-------------------|------------------|-------------------|
| C | 5.88525119048906  | 1.39877384845536 | 3.98477486079605  |
| H | 5.51792489074506  | 0.96250507838599 | 3.04343105382802  |
| H | 5.02683809149862  | 1.46651190466703 | 4.66838209090214  |
| H | 6.61373628367592  | 0.70772832237024 | 4.42879911765612  |
| C | 5.47013232929642  | 3.64443509468338 | 2.94139281846464  |
| H | 5.86126129036512  | 4.64844054104534 | 2.73369101005230  |
| H | 4.51759511210216  | 3.74113709412728 | 3.48092111529211  |
| H | 5.26617113523493  | 3.15044615553071 | 1.97731821225846  |
| C | 6.46713310135553  | 2.81187825786955 | 3.78174377711426  |
| C | 7.77501716643959  | 2.82357220533006 | 3.01698305833752  |
| C | 7.87526009435864  | 1.92989403310108 | 1.80625380651355  |
| H | 8.07361820688371  | 2.51273325270247 | 0.89322433874303  |
| H | 6.95679241796410  | 1.35799538208871 | 1.64610037898165  |
| H | 8.70616098953285  | 1.21392843923307 | 1.91565974334304  |
| C | 9.95550431634355  | 3.59650952146679 | 2.57140191411816  |
| H | 9.71202590046295  | 3.43721439963260 | 1.51268962840785  |
| H | 10.55313882684116 | 2.72279937854717 | 2.89030727247706  |
| C | 10.81848377205386 | 4.84577446889530 | 2.65773380894705  |
| H | 11.63790181297462 | 4.71190785718231 | 1.93368292278625  |
| H | 10.24502210382178 | 5.72612400025635 | 2.31442471129012  |
| C | 11.44824227313968 | 5.08837521269043 | 4.01815000290236  |
| H | 11.81556201101372 | 4.13528066327773 | 4.42260808983521  |
| H | 12.32175588808921 | 5.75759996835641 | 3.92481325163889  |
| C | 10.24502210382178 | 7.09498535188527 | 4.69613287599495  |
| H | 11.12000532921154 | 7.57431904419531 | 4.22904975485922  |
| H | 10.05162098426486 | 7.61500774004267 | 5.64527904942895  |
| C | 9.00933918972011  | 7.28786154929172 | 3.86473576578051  |
| C | 8.95248732714720  | 8.26837116610788 | 2.88175746778030  |
| H | 9.85966941309080  | 8.79881516306380 | 2.58765989137814  |
| C | 7.71439826824033  | 8.56553485874376 | 2.30672380938489  |
| H | 7.62993654239380  | 9.30698723634091 | 1.50916321121824  |
| C | 6.58700358053976  | 7.94491789747930 | 2.82568148969629  |
| H | 5.58905706931317  | 8.21786254850970 | 2.47873100781684  |
| C | 6.70770399340850  | 6.98258733485740 | 3.84519042673592  |
| C | 5.47890182676629  | 6.55292075757634 | 4.58364275097200  |
| H | 5.57820116235715  | 5.55665672061749 | 5.02401157537558  |
| H | 4.58658310255514  | 6.60571483122254 | 3.94545436465807  |
| H | 5.33656147416675  | 7.26195607227499 | 5.41779455359037  |
| C | 11.08748955678482 | 5.53989904742734 | 6.37106943079473  |
| H | 10.49014358429553 | 6.15866242995537 | 7.05252903770082  |
| H | 12.13526752415045 | 5.88495722379460 | 6.39969761157066  |
| C | 10.98866186468948 | 4.10944371281047 | 6.81276427140885  |
| C | 11.87231140103553 | 3.60644704902958 | 7.76145223959010  |
| H | 12.64535702031409 | 4.25419344921137 | 8.17819468831404  |
| C | 11.74451348561456 | 2.27818462336972 | 8.15741756816831  |
| H | 12.40627609945624 | 1.85080049858500 | 8.91385794930912  |
| C | 10.77704234075317 | 1.49855495712346 | 7.53486730078595  |
| H | 10.67195971767270 | 0.44078194883165 | 7.77947861868198  |
| C | 9.93186490506540  | 2.05436520101949 | 6.56489277729315  |
| C | 8.95598738786835  | 1.16757750275255 | 5.86011943911193  |
| H | 7.92862177516103  | 1.41781005578963 | 6.15736163309507  |
| H | 9.15846528838576  | 0.11352285834817 | 6.08994188394102  |
| H | 9.01969005861334  | 1.31020894876403 | 4.77351770822823  |
| C | 7.55623499339941  | 5.46112235287157 | 8.97697467744637  |
| C | 6.09441763990153  | 5.33384780550736 | 8.54765924469542  |
| H | 5.90915836039348  | 5.91173507156076 | 7.63226673271926  |
| H | 5.42853484729472  | 5.71183117060720 | 9.33875440778307  |
| H | 5.83971170580301  | 4.28246250902527 | 8.34933115039174  |
| C | 7.94033977966697  | 6.91699566929681 | 9.24811765762128  |
| H | 9.00654203093547  | 6.99056004607441 | 9.51539350441886  |
| H | 7.34864049543679  | 7.32109403694891 | 10.08382720494495 |
| H | 7.75540770790967  | 7.54038415312530 | 8.36198639095014  |
| C | 7.85973271437492  | 4.57320047975574 | 10.18469429777680 |
| H | 7.62304609713077  | 3.52210535429291 | 9.96138178845171  |
| H | 7.25489911272735  | 4.89020427277128 | 11.04753629317837 |

|    |                   |                  |                   |
|----|-------------------|------------------|-------------------|
| H  | 8.92275878824874  | 4.64113092851935 | 10.46162597840348 |
| N  | 10.51941061729722 | 5.68018047831095 | 5.01238871027747  |
| N  | 8.72555431504566  | 3.61571209880995 | 3.37919770376748  |
| N  | 7.92875217136493  | 6.57411765802092 | 4.25799718794419  |
| N  | 10.01224729747977 | 3.36672645893145 | 6.24626474560691  |
| O  | 8.29066110769660  | 5.66440624757172 | 6.74014036555569  |
| O  | 8.42675158013762  | 4.90012657357160 | 7.96335602287139  |
| S  | 6.70009310332789  | 3.55218252510710 | 5.45431661361209  |
| Mn | 8.59885730542245  | 4.69765425040174 | 5.21661718423219  |

**[Mn<sup>III</sup>(OO<sup>t</sup>Bu)(N4S)]<sup>+</sup> -quintet reactant (B3LYP-D3)**

|   |                   |                  |                  |
|---|-------------------|------------------|------------------|
| C | 5.76721181440121  | 1.35200912744455 | 4.28846644696253 |
| H | 5.51208112782595  | 0.74993558466526 | 3.40309145370491 |
| H | 4.84801947978220  | 1.46648359552803 | 4.88028385490648 |
| H | 6.48930726571259  | 0.79574375546675 | 4.89886394757028 |
| C | 5.28061053843309  | 3.39280629149597 | 2.91122708741097 |
| H | 5.62802247001124  | 4.37536709380459 | 2.56914537026051 |
| H | 4.30662438493659  | 3.52095283455350 | 3.40465363062047 |
| H | 5.13571003693743  | 2.74611763278900 | 2.03090969656516 |
| C | 6.28008906126577  | 2.75528276660435 | 3.90741987034420 |
| C | 7.61715823814073  | 2.74360965092616 | 3.19946929085937 |
| C | 7.80381447500337  | 1.74710406727901 | 2.08432413205207 |
| H | 7.93369272398123  | 2.25779364335016 | 1.11682765871013 |
| H | 6.94918560109420  | 1.07035762182225 | 1.99636566103553 |
| H | 8.70860761099930  | 1.14205368591106 | 2.25243540500578 |
| C | 9.76492289136036  | 3.62356064287020 | 2.70977569311406 |
| H | 5.53911068828723  | 3.35484381110720 | 1.66985246304019 |
| H | 10.43455622388511 | 2.83879240545280 | 3.10495974479086 |
| C | 10.49686122722935 | 4.96009997829632 | 2.68837899186813 |
| H | 11.24662338335028 | 4.89341161321953 | 1.88383323630177 |
| H | 9.80871110143163  | 5.76457049273942 | 2.39312810333437 |
| C | 11.24894878161123 | 5.30151444239870 | 3.96684581259629 |
| H | 11.78437473874541 | 4.40328652785708 | 4.30414291380024 |
| H | 12.01307594531559 | 6.07239663295420 | 3.76503224571664 |
| C | 10.13623318718545 | 7.22142492637799 | 5.00009695604598 |
| H | 11.07745913044849 | 7.76597684710580 | 4.81624281338797 |
| H | 9.74280843461671  | 7.53423074063697 | 5.97721526475727 |
| C | 9.09788239080468  | 7.58555309408233 | 3.97622087580681 |
| C | 9.31492045425603  | 8.58124676932611 | 3.02858895905562 |
| H | 10.29048288028101 | 9.06414835105819 | 2.94852435108945 |
| C | 8.25230678725503  | 8.94560962913788 | 2.19540935526545 |
| H | 8.38500962884116  | 9.71045034477168 | 1.42668451922040 |
| C | 7.01668061745448  | 8.34050161174842 | 2.38760301038614 |
| H | 6.15049429830433  | 8.63462697727924 | 1.79176609169332 |
| C | 6.86726623663109  | 7.35649174521025 | 3.38276723944856 |
| C | 5.50705011849509  | 6.82620083842436 | 3.72373967794438 |
| H | 5.57014431560181  | 5.89884166054842 | 4.30395552203811 |
| H | 4.88948059730030  | 6.67689610466550 | 2.82590300304481 |
| H | 4.98919763888879  | 7.57205748912572 | 4.35155448895063 |
| C | 11.08319603783972 | 5.50326526350077 | 6.37589712213702 |
| H | 10.51098524049851 | 6.00573323228405 | 7.16759882620904 |
| H | 12.10131526506849 | 5.92993187363923 | 6.36374776411468 |
| C | 11.12894431930483 | 4.03605994120251 | 6.70257109691188 |
| C | 12.15117114612568 | 3.51723185688495 | 7.49766102589041 |
| H | 12.96351339989910 | 4.16206141158829 | 7.83809184455003 |
| C | 12.09892212599370 | 2.17045788031028 | 7.85146379752866 |
| H | 12.87559486069197 | 1.72909723529562 | 8.48016252034477 |
| C | 11.03982979278503 | 1.39609312326000 | 7.38374146719785 |
| H | 10.96487177982019 | 0.33767924924509 | 7.63809784046985 |
| C | 10.06027351702157 | 1.98203332927846 | 6.57170883504448 |
| C | 8.91447580570986  | 1.17746675717876 | 6.03935269627412 |
| H | 7.96448472432483  | 1.67815792876746 | 6.27526436646027 |
| H | 8.90839389494991  | 0.16204231761246 | 6.45639608641687 |
| H | 8.97944731066339  | 1.09498451949481 | 4.94302709960913 |
| C | 7.55305398484983  | 5.30407109331915 | 9.07006063873553 |
| C | 6.10251069692316  | 5.00654362435393 | 8.69953434659115 |
| H | 5.78357114629317  | 5.62055774424631 | 7.84617342971939 |
| H | 5.44357412039019  | 5.23131362804279 | 9.55213513963278 |

|    |                   |                  |                   |
|----|-------------------|------------------|-------------------|
| H  | 5.97774870619916  | 3.94728362448604 | 8.43230194475446  |
| C  | 7.75951671533479  | 6.77546288804946 | 9.42822431630191  |
| H  | 8.81819175402798  | 6.97000454930857 | 9.66108171990511  |
| H  | 7.15795582748568  | 7.04427364328926 | 10.30997388626607 |
| H  | 7.45646961079022  | 7.42398886365308 | 8.59393409144019  |
| C  | 8.04823401167970  | 4.37842604477061 | 10.18170779924986 |
| H  | 7.93849325900842  | 3.32427363948614 | 9.88609104345439  |
| H  | 7.46042577557598  | 4.54615355123413 | 11.09646579881695 |
| H  | 9.10738867761108  | 4.57117066940979 | 10.40997594935453 |
| N  | 10.39700276752963 | 5.76722384532681 | 5.09179596922898  |
| N  | 8.52432746545940  | 3.60983118906255 | 3.50342106832951  |
| N  | 7.91933687134309  | 6.95189437624843 | 4.11260291489207  |
| N  | 10.11666002249702 | 3.28672002979245 | 6.24617232522026  |
| O  | 8.13009769331695  | 5.73244788250155 | 6.81200953761663  |
| O  | 8.44625248663231  | 4.94562388903840 | 7.97602057396583  |
| S  | 6.36979406436373  | 3.74602154181539 | 5.46056180903540  |
| Mn | 8.39182159588385  | 4.75131973498624 | 5.27175346962282  |

**[Mn<sup>III</sup>(OO'Bu)(N4S)]<sup>+</sup> -singlet reactant (TPSS-D3)**

|   |                   |                   |                  |
|---|-------------------|-------------------|------------------|
| C | 5.92759892470683  | 1.33720149643120  | 3.98565104121571 |
| H | 5.58551214267617  | 0.88495873384919  | 3.03836915930656 |
| H | 5.05697985321015  | 1.39605398605944  | 4.65865496931713 |
| H | 6.67089805462814  | 0.66917278593704  | 4.44580099810547 |
| C | 5.44969909039132  | 3.577311226014985 | 2.93911406157571 |
| H | 5.82564991257317  | 4.58852675597938  | 2.72307783411229 |
| H | 4.50174475917411  | 3.65607734329650  | 3.49506264339657 |
| H | 5.24565360040451  | 3.06949006226379  | 1.97889999188388 |
| C | 6.47930658360837  | 2.76514469516369  | 3.77037586170687 |
| C | 7.78574350754120  | 2.81157868685003  | 3.00810603862338 |
| C | 7.91687297845381  | 1.92492342531925  | 1.79161304726314 |
| H | 8.10205159340496  | 2.51965784843539  | 0.87929130372230 |
| H | 7.00813188877964  | 1.33077787841899  | 1.63134916416612 |
| H | 8.76684175261786  | 1.22681988873579  | 1.89902757676735 |
| C | 9.95191922450122  | 3.63848320620646  | 2.56199874641998 |
| H | 9.68790359359230  | 3.50063564689858  | 1.50168138882563 |
| H | 10.55424712852420 | 2.75771659994223  | 2.85884042404814 |
| C | 10.81205116790851 | 4.89263870844804  | 2.66586878387768 |
| H | 11.63122147482725 | 4.77357895134189  | 1.93530936346898 |
| H | 10.24080063941856 | 5.77969808707164  | 2.34306982871878 |
| C | 11.44321578729662 | 5.11674481166483  | 4.03323820661439 |
| H | 11.80240585474846 | 4.15793356697413  | 4.44048713356524 |
| H | 12.31599381002692 | 5.79327046286476  | 3.95415391362543 |
| C | 10.21581026331963 | 7.12460548817670  | 4.70994604687542 |
| H | 11.09745926196825 | 7.61149908883949  | 4.25666719777273 |
| H | 10.00376920409086 | 7.63203254706844  | 5.66565903027865 |
| C | 8.98770336486905  | 7.29859852371778  | 3.85970864010660 |
| C | 8.91912161224487  | 8.27823824775837  | 2.86997258274718 |
| H | 9.82066143324778  | 8.82859475545509  | 2.58624463269017 |
| C | 7.67946920990461  | 8.54431914950881  | 2.27269142883311 |
| H | 7.58882614752225  | 9.27781177017598  | 1.46595163506278 |
| C | 6.55572786099745  | 7.90359751685698  | 2.78925926698357 |
| H | 5.55352282423200  | 8.15604779034338  | 2.43146747606928 |
| C | 6.68088946101425  | 6.94814215077437  | 3.81951262967074 |
| C | 5.45136271583199  | 6.50929216016800  | 4.55836271668305 |
| H | 5.56408718182555  | 5.51285058814546  | 5.00725901187720 |
| H | 4.56131201096062  | 6.54634273878133  | 3.91175803918586 |
| H | 5.29574747009996  | 7.22554832713833  | 5.38710216935797 |
| C | 11.05581827727290 | 5.56555810475352  | 6.39680171799986 |
| H | 10.42209767656931 | 6.16506917495558  | 7.06917944505267 |
| H | 12.09449355479725 | 5.94325628450331  | 6.44128441302379 |
| C | 10.99068604943410 | 4.12483052903922  | 6.81813607073570 |
| C | 11.89853365193965 | 3.61608568906307  | 7.74882008463813 |
| H | 12.67134193470264 | 4.26953313584845  | 8.16334275704147 |
| C | 11.79500294280828 | 2.27630550109173  | 8.12901928880938 |
| H | 12.47757497020137 | 1.84581500313660  | 8.86779199534651 |
| C | 10.81967707524768 | 1.49254574829358  | 7.51301166243762 |
| H | 10.72650177196532 | 0.42864019251499  | 7.74691476345908 |
| C | 9.94677275755192  | 2.05142668217564  | 6.56332740401569 |

|    |                   |                  |                   |
|----|-------------------|------------------|-------------------|
| C  | 8.95196085702974  | 1.17120969455707 | 5.87338368688185  |
| H  | 7.92753979111864  | 1.45111003933374 | 6.17105090532557  |
| H  | 9.13536407683414  | 0.11518561980799 | 6.12110203082116  |
| H  | 9.01845978901076  | 1.29946620915431 | 4.78152482985413  |
| C  | 7.54012948480293  | 5.46821523744838 | 9.00163345488427  |
| C  | 6.07734819187829  | 5.62910259551377 | 8.57369855518020  |
| H  | 6.00832403051035  | 6.27900815586659 | 7.68718872353398  |
| H  | 5.48805368596154  | 6.08280813997303 | 9.38896865405453  |
| H  | 5.64058721631804  | 4.64820088189629 | 8.32373732481461  |
| C  | 8.20136373316342  | 6.81512643605346 | 9.31814799742685  |
| H  | 9.26180266725690  | 6.66833924633811 | 9.58774917690491  |
| H  | 7.69306136997302  | 7.30333599607552 | 10.16722088613728 |
| H  | 8.14347120999585  | 7.48866084351593 | 8.44748954269017  |
| C  | 7.68291758149644  | 4.47972243804638 | 10.16612246359093 |
| H  | 7.24479373257199  | 3.50368844998223 | 9.89980243617716  |
| H  | 7.15603080359347  | 4.87112674559163 | 11.05263339764986 |
| H  | 8.74486016648642  | 4.33316734085812 | 10.42545704108369 |
| N  | 10.49374340151523 | 5.70004542130811 | 5.02493162223500  |
| N  | 8.72066175440192  | 3.63672036479625 | 3.38685015902153  |
| N  | 7.91365133861197  | 6.55385109910589 | 4.24658257566854  |
| N  | 10.00840884357801 | 3.37435435363011 | 6.25125598511677  |
| O  | 8.26335521230523  | 5.61860862720596 | 6.72889522480211  |
| O  | 8.29303298866862  | 4.78501045552528 | 7.94982591304197  |
| S  | 6.70852471510426  | 3.54165645514252 | 5.43166583604452  |
| Mn | 8.57872235017757  | 4.69654937668625 | 5.19733298997658  |

### [Mn<sup>III</sup>(OO'Bu)(N4S)]<sup>+</sup> -triplet reactant (TPSS-D3)

|   |                   |                  |                  |
|---|-------------------|------------------|------------------|
| C | 5.88867060515853  | 1.39168816068430 | 3.96275028836858 |
| H | 5.54954314173175  | 0.94454553021130 | 3.01204616817038 |
| H | 5.01144156375335  | 1.46654980143011 | 4.62564716842870 |
| H | 6.61535658257226  | 0.71243418757636 | 4.43297171010974 |
| C | 5.45896640237020  | 3.64661269937207 | 2.92359743331603 |
| H | 5.85602109934266  | 4.65112037341191 | 2.71385964577925 |
| H | 4.51080572289845  | 3.74151507342672 | 3.47657506263784 |
| H | 5.24739319064755  | 3.14887096071762 | 1.95984778978857 |
| C | 6.46901666496936  | 2.80903222615225 | 3.75241955303230 |
| C | 7.77997513770277  | 2.82849389045421 | 2.99535711483243 |
| C | 7.88975885416648  | 1.95615949646879 | 1.76615211448071 |
| H | 8.09673925129128  | 2.55726441588781 | 0.86271206041734 |
| H | 6.96289122744481  | 1.39399298729760 | 1.59374875218551 |
| H | 8.71551556984522  | 1.22889806067473 | 1.86767184789515 |
| C | 9.97733027176526  | 3.59823433086728 | 2.58668740969762 |
| H | 9.72817496119011  | 3.43812523555977 | 1.52628312165500 |
| H | 10.57186747954255 | 2.72236806129882 | 2.91223425936864 |
| C | 10.83932495520457 | 4.85285612852867 | 2.67511670812416 |
| H | 11.65896415039277 | 4.72405863367731 | 1.94675991232608 |
| H | 10.26857716844159 | 5.73637629204306 | 2.34162696616985 |
| C | 11.47058222731135 | 5.09268633477918 | 4.03973620144493 |
| H | 11.82970638627784 | 4.13841660899276 | 4.45797635339411 |
| H | 12.34391710364575 | 5.76747033365465 | 3.95299446640634 |
| C | 10.24751289627429 | 7.11067345631908 | 4.70150694220053 |
| H | 11.12998433080654 | 7.59138829093908 | 4.24356166965691 |
| H | 10.03771662967617 | 7.62476752948615 | 5.65408711020832 |
| C | 9.01857697976602  | 7.28365701895214 | 3.85201535787382 |
| C | 8.95374139297543  | 8.25707839711511 | 2.85623995730703 |
| H | 9.85912787213289  | 8.79678246164670 | 2.56439161523476 |
| C | 7.71300347180393  | 8.53333952473100 | 2.26517800468036 |
| H | 7.62523891834469  | 9.26192755675688 | 1.45374129395785 |
| C | 6.58557046364836  | 7.91185174128266 | 2.79696894423374 |
| H | 5.58335830237881  | 8.17612087392144 | 2.44781202653885 |
| C | 6.70712531653577  | 6.96179383066715 | 3.83263169213679 |
| C | 5.48018689300440  | 6.54929237925884 | 4.59089058350108 |
| H | 5.57547442540725  | 5.54752387631196 | 5.03133059624221 |
| H | 4.58017711825608  | 6.61380741765260 | 3.96052921221060 |
| H | 5.35929682092357  | 7.26339190782381 | 5.42731986837014 |
| C | 11.07845161000000 | 5.55337604418962 | 6.40165381641421 |
| H | 10.44362893655359 | 6.15478093046634 | 7.07095299598450 |
| H | 12.11963001699625 | 5.92247984485359 | 6.45190205411598 |

|    |                   |                  |                   |
|----|-------------------|------------------|-------------------|
| C  | 10.99762671302986 | 4.11198618361047 | 6.81549979223305  |
| C  | 11.91745378264348 | 3.57905379185293 | 7.71845163659755  |
| H  | 12.71181326215495 | 4.21644911096838 | 8.11663738962458  |
| C  | 11.80021377193042 | 2.23861566501535 | 8.09321971487955  |
| H  | 12.49361762047031 | 1.79028692958079 | 8.81081880150223  |
| C  | 10.79562654493900 | 1.47885578896656 | 7.49600224444603  |
| H  | 10.68835474965487 | 0.41488751793080 | 7.72354671311404  |
| C  | 9.90726577459129  | 2.05837270952347 | 6.57328849148230  |
| C  | 8.87674602154049  | 1.19257120432402 | 5.91709433014181  |
| H  | 7.88236525218638  | 1.38380307599889 | 6.35293464737839  |
| H  | 9.13404882740848  | 0.13044688359973 | 6.04699206903440  |
| H  | 8.80821923295690  | 1.42285611946485 | 4.84440126239941  |
| C  | 7.54892704947324  | 5.46234600492782 | 9.00640958819645  |
| C  | 6.08392151474554  | 5.31094112858588 | 8.58107698150197  |
| H  | 5.89842019854230  | 5.86338374438783 | 7.64652114319923  |
| H  | 5.41470322468108  | 5.70930262307211 | 9.36298901792682  |
| H  | 5.83858753071548  | 4.24945264004497 | 8.41316350091987  |
| C  | 7.92996132314510  | 6.93114024745118 | 9.23019124028151  |
| H  | 8.99647293525189  | 7.01698476049601 | 9.50179824801173  |
| H  | 7.32831502646508  | 7.36113043815732 | 10.04914277786486 |
| H  | 7.74586109749582  | 7.52059315306920 | 8.31749164269857  |
| C  | 7.87005758968726  | 4.60280725177915 | 10.23662545383077 |
| H  | 7.63889783763646  | 3.54287274589198 | 10.03904385807511 |
| H  | 7.26323262300173  | 4.93978147906379 | 11.09396949213366 |
| H  | 8.93609332558364  | 4.68910303713178 | 10.50581796080186 |
| N  | 10.52418077709649 | 5.68820383517505 | 5.02648818924017  |
| N  | 8.73578145689279  | 3.61957523677318 | 3.39419014673052  |
| N  | 7.93845659377554  | 6.55157129095852 | 4.24901980070122  |
| N  | 9.98470384269374  | 3.38262745104702 | 6.26649330705888  |
| O  | 8.27121741795320  | 5.62965492866427 | 6.73277469953596  |
| O  | 8.42450324045882  | 4.86543748984040 | 8.00107469770979  |
| S  | 6.70956470169019  | 3.56006045791662 | 5.42419471962706  |
| Mn | 8.59903002635591  | 4.68229516918733 | 5.2176355922264   |

**[Mn<sup>III</sup>(OO<sup>t</sup>Bu)(N4S)]<sup>+</sup> -quintet reactant (TPSS-D3)**

|   |                   |                  |                  |
|---|-------------------|------------------|------------------|
| C | 5.76786861629230  | 1.37109172533206 | 4.22453598684325 |
| H | 5.51107187999740  | 0.78902938168730 | 3.32222381298963 |
| H | 4.84694201448999  | 1.49159301817289 | 4.81714571327527 |
| H | 6.48728523135086  | 0.79777058314978 | 4.82758425696083 |
| C | 5.30177737323614  | 3.46503781576585 | 2.89890306871696 |
| H | 5.67122942801021  | 4.45139012883982 | 2.58159593091010 |
| H | 4.33501508958109  | 3.59670937920298 | 3.41071553665510 |
| H | 5.13717049504654  | 2.84252781366788 | 2.00107912838198 |
| C | 6.30287248348578  | 2.77797379853811 | 3.86940351014982 |
| C | 7.63528501136507  | 2.76133095643518 | 3.15625399958160 |
| C | 7.80072521527055  | 1.79608418229588 | 2.00623386677751 |
| H | 7.96936599785202  | 2.33445405832222 | 1.05660977557654 |
| H | 6.91259192231839  | 1.16280479689989 | 1.88735211940997 |
| H | 8.67480118922578  | 1.14151380247663 | 2.16973356110171 |
| C | 9.81835268678717  | 3.59703866140019 | 2.70969277947379 |
| H | 9.59395820740378  | 3.31962372349449 | 1.66872923192772 |
| H | 10.47432138169758 | 2.80843975893474 | 3.12566057420759 |
| C | 10.56343309856417 | 4.93038968952757 | 2.69158560407855 |
| H | 11.32659462486230 | 4.85439124062490 | 1.89727048072259 |
| H | 9.88373403312350  | 5.74406933646352 | 2.38889316237559 |
| C | 11.29509300437864 | 5.26361785803114 | 3.98771312939147 |
| H | 11.79399929657233 | 4.35413576615186 | 4.35902741027738 |
| H | 12.08026425106025 | 6.02211509776328 | 3.80761176504377 |
| C | 10.15194309733307 | 7.22015686645514 | 4.94540834404805 |
| H | 11.09369496009595 | 7.75067293883577 | 4.71475204194560 |
| H | 9.78688311450337  | 7.56443181778241 | 5.92652851996617 |
| C | 9.08045141493391  | 7.54475534451609 | 3.93892101812286 |
| C | 9.25812929840594  | 8.50170762775733 | 2.93663495628440 |
| H | 10.23233586533676 | 8.97804497926864 | 2.79249272400643 |
| C | 8.15634010905634  | 8.83461284017006 | 2.13547653527652 |
| H | 8.25624431457338  | 9.56317130705752 | 1.32482064242483 |
| C | 6.92152688192385  | 8.25004263980716 | 2.41796523806713 |
| H | 6.02768932427091  | 8.53048224785014 | 1.85291126625456 |

|    |                   |                  |                   |
|----|-------------------|------------------|-------------------|
| C  | 6.81036420165530  | 7.31130188526713 | 3.46551888093741  |
| C  | 5.46683564453321  | 6.81879059444831 | 3.92100883373141  |
| H  | 5.55098957464461  | 5.84672396596832 | 4.42997428702360  |
| H  | 4.74735231743427  | 6.76298443134913 | 3.08863883059959  |
| H  | 5.06647406732412  | 7.53990874877393 | 4.65852331665469  |
| C  | 11.07128877612512 | 5.53147782954919 | 6.39625062962614  |
| H  | 10.46284413868039 | 6.04558750483118 | 7.15776945576926  |
| H  | 12.08694307457892 | 5.97034878225130 | 6.39762669799136  |
| C  | 11.11839472732817 | 4.06608861856585 | 6.73955751867733  |
| C  | 12.10473060002909 | 3.55577441502616 | 7.59062031622412  |
| H  | 12.89615554348677 | 4.20895548335708 | 7.96970086149621  |
| C  | 12.04226121280648 | 2.20607517885153 | 7.94949058589411  |
| H  | 12.78911496921954 | 1.77210839323148 | 8.62143720264834  |
| C  | 11.01065189848024 | 1.41998792053398 | 7.42955452919517  |
| H  | 10.93018250787006 | 0.35972845439793 | 7.68508267149110  |
| C  | 10.06677872146482 | 1.99357087056418 | 6.56085650917003  |
| C  | 8.95665242994461  | 1.17759485250315 | 5.96709028161558  |
| H  | 8.00221112037861  | 1.72046456208560 | 6.07830616451171  |
| H  | 8.88418340211965  | 0.19147394946683 | 6.44964183517809  |
| H  | 9.12999061862764  | 1.01748809040027 | 4.88758362803378  |
| C  | 7.55381961868660  | 5.30190872278289 | 9.07043755203228  |
| C  | 6.09120349077975  | 5.05703411305626 | 8.69197674429860  |
| H  | 5.81044329362917  | 5.67051842382311 | 7.82101815996826  |
| H  | 5.43374941028600  | 5.32693094678607 | 9.53598584920632  |
| H  | 5.92717159902418  | 3.99617726150775 | 8.44266381221324  |
| C  | 7.82505852922210  | 6.77208520747732 | 9.40603907289881  |
| H  | 8.89148808208595  | 6.92296610142839 | 9.64706565052159  |
| H  | 7.22428655943960  | 7.08276118715464 | 10.27770692783826 |
| H  | 7.55742811761855  | 7.41588586004746 | 8.55257017850338  |
| C  | 10.1843213289470  | 4.36258686940394 | 10.19054833917467 |
| H  | 7.86646205579681  | 3.30972666819477 | 9.90063397877958  |
| H  | 7.43513824016090  | 4.56312888353367 | 11.10475538474571 |
| H  | 9.08669531675772  | 4.51917019624432 | 10.41541471579629 |
| N  | 10.40663227175349 | 5.75821129213398 | 5.08317456254652  |
| N  | 8.56555806234460  | 3.60393653133959 | 3.49874371696998  |
| N  | 7.90251642296735  | 6.91988098899813 | 4.16093178138062  |
| N  | 10.12801167685785 | 3.30572406751425 | 6.23078310785932  |
| O  | 8.15584359487711  | 5.69616169681570 | 6.79361743124985  |
| O  | 8.44134570523508  | 4.88225583399651 | 7.97763980293747  |
| S  | 6.43174859110409  | 3.73357635654060 | 5.44243735699325  |
| Mn | 8.43615976933905  | 4.73098007711846 | 5.25264214639031  |

**[Mn<sup>III</sup>(OO<sup>t</sup>Bu)(N<sub>4</sub>S)]<sup>+</sup> -quintet reactant (B3LYP)**

|   |                   |                  |                  |
|---|-------------------|------------------|------------------|
| C | 5.86118340142653  | 1.22248242640905 | 4.28299628304147 |
| H | 5.63961615462670  | 0.59139231660175 | 3.40798812382315 |
| H | 4.94449574204704  | 1.27237770533595 | 4.88857001201014 |
| H | 6.63178624332186  | 0.72859599482650 | 4.88797083750526 |
| C | 5.17099552558446  | 3.22436547622211 | 2.93319353155430 |
| H | 5.42174838091947  | 4.23231113311031 | 2.57840629071699 |
| H | 4.21738345151229  | 3.28109711762129 | 3.47842184743926 |
| H | 5.01987181380119  | 2.57126354939596 | 2.05838330178048 |
| C | 6.26378453128411  | 2.65902347749531 | 3.87735778045812 |
| C | 7.58108827020417  | 2.71280957597315 | 3.12520763129910 |
| C | 7.73306886819759  | 1.78611809169403 | 1.94061242737419 |
| H | 7.83115301219207  | 2.35557539434206 | 1.00198484865679 |
| H | 6.87485147874691  | 1.11531389354572 | 1.83508620968006 |
| H | 8.64037072704915  | 1.16876061216220 | 2.03765451088046 |
| C | 9.72804512654879  | 3.61150561563190 | 2.63657579765992 |
| H | 9.47958583120708  | 3.38747808317893 | 1.59078051872744 |
| H | 10.41019412772232 | 2.81158711241039 | 2.97773499758813 |
| C | 10.46295942907977 | 4.95053727999026 | 2.64908041479476 |
| H | 11.20939356864279 | 4.89812682868858 | 1.83916390072416 |
| H | 9.77713747479556  | 5.76379178968313 | 2.37048175016231 |
| C | 11.22818107365809 | 5.27033488544523 | 3.92901896435862 |
| H | 11.78198378653757 | 4.37065913100114 | 4.23467570726398 |
| H | 11.98298338091634 | 6.05224724009745 | 3.73045010087222 |
| C | 10.13787046225033 | 7.16767868140262 | 5.05168882574890 |
| H | 11.08927559765064 | 7.70721767270144 | 4.90391460056538 |



|    |                   |                   |                   |
|----|-------------------|-------------------|-------------------|
| H  | 9.74632881556720  | 7.43899238061931  | 6.04276400109080  |
| C  | 9.11314383707232  | 7.62218403330959  | 4.04542203095641  |
| C  | 9.35193758123804  | 8.72140962567916  | 3.22280344931018  |
| H  | 10.33084759248488 | 9.20538095368924  | 3.21661894980092  |
| C  | 8.30583186928100  | 9.19445811135092  | 2.42389949347568  |
| H  | 8.45470911386313  | 10.04931882143785 | 1.75948924545849  |
| C  | 7.06797531436866  | 8.57150057011805  | 2.51401906773528  |
| H  | 6.21504302290528  | 8.93536861302330  | 1.93678497172077  |
| C  | 6.90039244365456  | 7.46703483757276  | 3.37216326305946  |
| C  | 5.53655172501109  | 6.86366578100904  | 3.55442071065660  |
| H  | 5.57810432534270  | 5.95916113598696  | 4.17237484091583  |
| H  | 5.06357168180511  | 6.63654667544845  | 2.58572894058697  |
| H  | 4.88136402920629  | 7.59192298856882  | 4.06234779081227  |
| C  | 11.11114993252162 | 5.41663455709051  | 6.35311551439685  |
| H  | 10.54172218806225 | 5.88797125225023  | 7.16733880275413  |
| H  | 12.11593586249129 | 5.87467399685368  | 6.33319613909041  |
| C  | 11.21161625445119 | 3.94553728430955  | 6.65976470953827  |
| C  | 12.31950558409846 | 3.44306233785434  | 7.34649822700985  |
| H  | 13.15520483184194 | 4.09972124372045  | 7.59732285531914  |
| C  | 12.32267882479329 | 2.09812531586259  | 7.71245027521556  |
| H  | 13.16729706167846 | 1.66973708890963  | 8.25768536961992  |
| C  | 11.22614110489288 | 1.31183404431588  | 7.36851555908433  |
| H  | 11.18774331798151 | 0.25577272263897  | 7.64216094438281  |
| C  | 10.15850250369949 | 1.88055921183952  | 6.65857770864978  |
| C  | 8.97452019917310  | 1.04865698961233  | 6.26199036193280  |
| H  | 8.03878105667830  | 1.55312835221353  | 6.54311058320838  |
| H  | 9.00786458339120  | 0.05615178990937  | 6.73148911568082  |
| H  | 8.95716494311075  | 0.90391912672905  | 5.16928681264362  |
| C  | 7.45071253881806  | 5.40009463878861  | 9.08826048513495  |
| C  | 5.99100037751730  | 5.13354192799974  | 8.71931743908167  |
| H  | 5.69694813368373  | 5.70970919650445  | 7.83071038203432  |
| H  | 5.33268460026051  | 5.42814598014883  | 9.55157850811094  |
| H  | 5.82860025973333  | 4.06538762936658  | 8.51202194050300  |
| C  | 7.70746314281031  | 6.88555358546139  | 9.35561334865220  |
| H  | 8.76704548769545  | 7.05963349325586  | 9.60181924005029  |
| H  | 7.09848632223471  | 7.23126792420217  | 10.20546143831698 |
| H  | 7.44433662734328  | 7.49376316098227  | 8.47810007090171  |
| C  | 7.89340976235495  | 4.53557790865333  | 10.27277809120330 |
| H  | 7.74170062049744  | 3.46712327099623  | 10.05716059153020 |
| H  | 7.30211517457480  | 4.79480488096077  | 11.16418964302166 |
| H  | 8.95670089093741  | 4.69913165964788  | 10.50588902373014 |
| N  | 10.39151959988139 | 5.70296689587770  | 5.08524288685209  |
| N  | 8.50300341130419  | 3.55463052234867  | 3.46157663021033  |
| N  | 7.92941768706461  | 6.98267340326065  | 4.08727124234338  |
| N  | 10.16436366851634 | 3.18283878078155  | 6.31146090501226  |
| O  | 8.09681515633579  | 5.65266634747327  | 6.81346289621620  |
| O  | 8.34675956044925  | 4.92830833219086  | 8.03193534258154  |
| S  | 6.34564415154422  | 3.67479795715909  | 5.42074901692570  |
| Mn | 8.38321876585154  | 4.66155457704923  | 5.27914692879365  |

**[Mn<sup>III</sup>(OO'Bu)(N4S)]<sup>+</sup> -quintet reactant (M06-L)**

|   |                   |                  |                  |
|---|-------------------|------------------|------------------|
| C | 5.73003531926176  | 1.38127773831097 | 4.25765685677120 |
| H | 5.45092038113439  | 0.79964311114747 | 3.36760328724619 |
| H | 4.81734437243783  | 1.49927561614038 | 4.85508580560213 |
| H | 6.43389712457225  | 0.78676777095456 | 4.85314463572139 |
| C | 5.31322678222378  | 3.45299274660650 | 2.92660912281495 |
| H | 5.69509918580214  | 4.42818747481443 | 2.59858628173629 |
| H | 4.33894108307849  | 3.61031808279549 | 3.40802112108432 |
| H | 5.14452639010577  | 2.83558029489467 | 2.03059021178381 |
| C | 6.27757447166335  | 2.76546353734412 | 3.90642281880892 |
| C | 7.60797012550374  | 2.73208638586338 | 3.20086603961097 |
| C | 7.78309665034022  | 1.73561552355923 | 2.10153966013859 |
| H | 7.89935180868207  | 2.23072075319808 | 1.12618297260630 |
| H | 6.93472647233174  | 1.05079130647954 | 2.02646876128175 |
| H | 8.69339761315845  | 1.13801718580514 | 2.25295377093414 |
| C | 9.75822641447447  | 3.59391180160424 | 2.71008995094896 |
| H | 9.53567951224518  | 3.31140878584856 | 1.67195191664875 |
| H | 10.41538289442663 | 2.79973620315886 | 3.11062807214304 |

|    |                   |                  |                   |
|----|-------------------|------------------|-------------------|
| C  | 10.50563260004687 | 4.91150335577183 | 2.68398786499151  |
| H  | 11.25689731147503 | 4.82983058409065 | 1.88497775909947  |
| H  | 9.83420412096174  | 5.72196755655390 | 2.36164827680782  |
| C  | 11.24776217676254 | 5.26481061758231 | 3.95444936798075  |
| H  | 11.76308348998339 | 4.36477913229734 | 4.32073916228944  |
| H  | 12.03652366414835 | 6.01021038701201 | 3.75101593727312  |
| C  | 10.15699673356742 | 7.22573174583659 | 4.92535065934689  |
| H  | 11.09973452089589 | 7.75513036518678 | 4.70525590867420  |
| H  | 9.80505512598529  | 7.57919445061495 | 5.90685867400031  |
| C  | 9.09545556275964  | 7.57371570764200 | 3.93313287373274  |
| C  | 9.28703418744674  | 8.55101045305954 | 2.96350914014961  |
| H  | 10.26274465269989 | 9.02613276422500 | 2.84455030637553  |
| C  | 8.20530747430188  | 8.90499570439127 | 2.15914132059400  |
| H  | 8.32050657165921  | 9.65396501607121 | 1.37327996370843  |
| C  | 6.97480722311869  | 8.31492678012031 | 2.40101145055208  |
| H  | 6.09374775984015  | 8.60536463462777 | 1.82582496722856  |
| C  | 6.84680021751109  | 7.35383283578299 | 3.41646345436211  |
| C  | 5.50476719913940  | 6.84874157435785 | 3.81285578444378  |
| H  | 5.56073844855442  | 5.88489274305076 | 4.33168201104628  |
| H  | 4.81741739325864  | 6.78329165423600 | 2.96016294333710  |
| H  | 5.05701841819050  | 7.56019426224818 | 4.52446721325050  |
| C  | 11.08314344932853 | 5.54316518522917 | 6.34975319650844  |
| H  | 10.53100389882035 | 6.09778179076099 | 7.12394826214043  |
| H  | 12.10800858047197 | 5.95560314997909 | 6.32233445155027  |
| C  | 11.10230524757779 | 4.09770208428848 | 6.73120127323934  |
| C  | 12.03735941379144 | 3.62041637715946 | 7.64725149644220  |
| H  | 12.79942078454780 | 4.28894591707491 | 8.05178785384744  |
| C  | 11.96053593899711 | 2.29070937322473 | 8.03890458811897  |
| H  | 12.66802862210488 | 1.88248131744617 | 8.76319635062463  |
| C  | 10.97437800403380 | 1.48456719673101 | 7.48390622603315  |
| H  | 10.89143342571864 | 0.43263430365425 | 7.76075002794578  |
| C  | 10.08302485497433 | 2.02405763643372 | 6.55273562380361  |
| C  | 9.02689430010916  | 1.18837397134950 | 5.92183691414096  |
| H  | 8.04216024620704  | 1.66099465891866 | 6.05591282790637  |
| H  | 8.99801971869336  | 0.17914209397041 | 6.34720633698911  |
| H  | 9.19928380122086  | 1.08727398481071 | 4.83887178496316  |
| C  | 7.57849958900507  | 5.24803707160449 | 9.05930286697732  |
| C  | 6.12989855608618  | 5.00887218357083 | 8.68651285494590  |
| H  | 5.83609306122801  | 5.62730943629701 | 7.82773748976987  |
| H  | 5.47431392778581  | 5.27003490213573 | 9.52847100514674  |
| H  | 5.95122727144928  | 3.95539211021749 | 8.43287271906479  |
| C  | 7.83113478937996  | 6.69228179652086 | 9.44851365287308  |
| H  | 8.89437481521976  | 6.86081280598436 | 9.67047265927983  |
| H  | 7.25269941049427  | 6.96130348932881 | 10.34268518957372 |
| H  | 7.53407020794649  | 7.37118988950429 | 8.63894997749134  |
| C  | 8.05633056770565  | 4.28024491749326 | 10.12593750237193 |
| H  | 7.91074705242722  | 3.23862261294826 | 9.80912554045250  |
| H  | 7.49328829189432  | 4.43491939370160 | 11.05557119137597 |
| H  | 9.12155351886570  | 4.42972872117913 | 10.34909224225836 |
| N  | 10.39905797235273 | 5.77481251659822 | 5.06286927573433  |
| N  | 8.51962893541814  | 3.60169694669131 | 3.49712763380041  |
| N  | 7.91856971619825  | 6.94897885556740 | 4.12344863443116  |
| N  | 10.15059063180592 | 3.32215739926968 | 6.19271446330725  |
| O  | 8.16844268089743  | 5.74608941299186 | 6.82221391877596  |
| O  | 8.45902789264006  | 4.89912136672767 | 7.94635662367562  |
| S  | 6.38867201330726  | 3.71821186808817 | 5.47561585951885  |
| Mn | 8.39773035754395  | 4.75956961926223 | 5.26253015979393  |

**[Mn<sup>III</sup>(OO'Bu)(N4S)]<sup>+</sup> -quintet reactant (TPSS)**

|   |                  |                  |                  |
|---|------------------|------------------|------------------|
| C | 5.86831295073649 | 1.24781373868942 | 4.22540776205873 |
| H | 5.63960307390858 | 0.64480684960737 | 3.32857639831189 |
| H | 4.95044316745788 | 1.30211959045639 | 4.83315895404055 |
| H | 6.63615246744464 | 0.72810165952632 | 4.81675085562419 |
| C | 5.19733463983285 | 3.30513749739999 | 2.93771407226822 |
| H | 5.47065463607160 | 4.31684159821467 | 2.60262343765378 |
| H | 4.25287155220203 | 3.36678141323857 | 3.50255090461933 |
| H | 5.02489928723779 | 2.67142277495808 | 2.04902167035269 |
| C | 6.29478821947231 | 2.69171279181824 | 3.85416082911978 |

|    |                   |                  |                   |
|----|-------------------|------------------|-------------------|
| C  | 7.60295200220416  | 2.74493522975795 | 3.09248912130200  |
| C  | 7.73087057067332  | 1.85197814004122 | 1.87656779837530  |
| H  | 7.88030544528562  | 2.44785760672054 | 0.95820405778357  |
| H  | 6.83287139095661  | 1.23565083147657 | 1.73829466563034  |
| H  | 8.60112474230549  | 1.17821666583890 | 1.97140593766497  |
| C  | 9.77668194547182  | 3.60339763612686 | 2.62549276873241  |
| H  | 9.51487739770089  | 3.39617440955187 | 1.57630409843763  |
| H  | 10.43753159901615 | 2.78117426343652 | 2.96193440388315  |
| C  | 10.54361555523962 | 4.92691180153091 | 2.65818469948364  |
| H  | 11.30464029124061 | 4.86169582388544 | 1.85985695764907  |
| H  | 9.87948951993977  | 5.76189576666667 | 2.37845237691281  |
| C  | 11.28667643426088 | 5.21672919070685 | 3.96112654351042  |
| H  | 11.77955626468112 | 4.29299011321384 | 4.30630330366852  |
| H  | 12.08139755523287 | 5.96873968189874 | 3.79150195086880  |
| C  | 10.17258923001571 | 7.17022837128698 | 4.98186948066406  |
| H  | 11.12453862301385 | 7.69266796399150 | 4.77184511828617  |
| H  | 9.81715110108234  | 7.48756046728969 | 5.97627048473171  |
| C  | 9.10752065959577  | 7.57023070419148 | 3.99225280122749  |
| C  | 9.30213637444076  | 8.61715685418930 | 3.08514311153445  |
| H  | 10.28179911003793 | 9.09632370228488 | 2.99344655387294  |
| C  | 8.21022934309787  | 9.04068274717396 | 2.31378088972085  |
| H  | 8.32326436405447  | 9.84703937233015 | 1.58189767404247  |
| C  | 6.97060988014453  | 8.43695248702728 | 2.52286006088851  |
| H  | 6.08477214634054  | 8.77459221979416 | 1.97594102012901  |
| C  | 6.84485708712491  | 7.39439343537661 | 3.46685091030609  |
| C  | 5.49035982385733  | 6.84146984972824 | 3.81570974580772  |
| H  | 5.57631866338236  | 5.86814480573187 | 4.32170985881457  |
| H  | 4.84308614401527  | 6.76077650726941 | 2.92662029717958  |
| H  | 4.99329267641500  | 7.53785482575796 | 4.51756954606183  |
| C  | 11.10409795991476 | 5.45581023674718 | 6.38236670686468  |
| H  | 10.49861158086843 | 5.94988552657514 | 7.16028866508903  |
| H  | 12.11030460401449 | 5.91678890421812 | 6.37500661921468  |
| C  | 11.19132720923005 | 3.98856818086221 | 6.71499493061071  |
| C  | 12.25368776532802 | 3.48771451007795 | 7.47856925848482  |
| H  | 13.07113119014501 | 4.14779623988682 | 7.78445477726023  |
| C  | 12.23416700428155 | 2.13872366496983 | 7.84582640388059  |
| H  | 13.04161610244477 | 1.71181635039303 | 8.44925485383405  |
| C  | 11.16399829401370 | 1.34604503408715 | 7.42352095349820  |
| H  | 11.11179455027945 | 0.28658827605568 | 7.69098379537664  |
| C  | 10.14245458093753 | 1.91019053159466 | 6.63821194701103  |
| C  | 8.99316987955457  | 1.07524107991650 | 6.15009066166320  |
| H  | 8.03949270846043  | 1.59449163658685 | 6.34439974915203  |
| H  | 8.98492230185645  | 0.08712927254813 | 6.63502821012227  |
| H  | 9.07095434310421  | 0.91902439010171 | 5.05860250146231  |
| C  | 7.46093019324111  | 5.39323011736682 | 9.07528434662222  |
| C  | 5.99908284003584  | 5.15538026383079 | 8.68211389799088  |
| H  | 5.74323971100797  | 5.72453051128982 | 7.77387306901328  |
| H  | 5.33200763059286  | 5.48499300668952 | 9.49746162014851  |
| H  | 5.81580111824383  | 4.08544745317381 | 8.49012499752449  |
| C  | 7.75265620136517  | 6.87701318723410 | 9.33442348114881  |
| H  | 8.81454016876510  | 7.02573028152864 | 9.59693098433641  |
| H  | 7.13531476251573  | 7.24437235176309 | 10.17227785174746 |
| H  | 7.51711221952162  | 7.48040917050940 | 8.44253365788193  |
| C  | 7.87751412724069  | 4.51731665132837 | 10.26644635635641 |
| H  | 7.70604756383881  | 3.45042466038622 | 10.04659829710131 |
| H  | 7.27752099057859  | 4.79191125489316 | 11.15052775418426 |
| H  | 8.94324266261799  | 4.66373707149889 | 10.51027062472313 |
| N  | 10.41359677444994 | 5.69737284652478 | 5.07958054197033  |
| N  | 8.54664944278782  | 3.56615730280197 | 3.45732926139211  |
| N  | 7.92236203132637  | 6.93686864780544 | 4.14527658160970  |
| N  | 10.16424092111815 | 3.22146939658604 | 6.29425826862621  |
| O  | 8.14189915494548  | 5.63553100004846 | 6.79193479806664  |
| O  | 8.36614813035455  | 4.88507144658930 | 8.02810193438754  |
| S  | 6.42297815092546  | 3.66706612112216 | 5.41946344603489  |
| Mn | 8.43779219489925  | 4.66024703422152 | 5.25622207438830  |
